1           **Genetic variation at the *Cyp6m2* putative insecticide resistance locus in**

2                           ***Anopheles gambiae* and *Anopheles coluzzii***

3   **Authors**

4   Martin G. Wagah<sup>1,\*</sup>, Petra Korlević<sup>1,2</sup>, Christopher Clarkson<sup>1</sup>, Alistair Miles<sup>3</sup>, The *Anopheles gambiae*  
5   1000 Genomes Consortium<sup>1</sup>, Mara K. N. Lawniczak<sup>1</sup>, Alex Makunin<sup>1</sup>.

6   **Contact information**

7   \*Corresponding authors: mw21@sanger.ac.uk

8   **Affiliations**

9           1. Wellcome Sanger Institute, Hinxton, Cambridgeshire, CB10 1SD, United Kingdom

10          2. European Molecular Biology Laboratory, European Bioinformatics Institute, Hinxton,  
11           Cambridgeshire, CB10 1SD, United Kingdom.

12          3. University of Oxford, Wellcome Trust Centre for Human Genetics, Oxford, OX3 7BN, United  
13           Kingdom

14

15

16

17

18

19

20

## 21 **Abstract**

## 22 **Background**

23 The emergence of insecticide resistance is a major threat to malaria control programmes in Africa,  
24 with many different factors contributing to insecticide resistance in its vectors, *Anopheles* mosquitoes.  
25 *CYP6M2* has previously been recognized as an important candidate in cytochrome P450-mediated  
26 detoxification in *Anopheles* mosquitoes. As it has been implicated in resistance against pyrethroids,  
27 organochlorines and carbamates, its broad metabolic activity makes it a potential agent in insecticide  
28 cross-resistance. Currently, allelic variation within the *Cyp6m2* gene remains unknown.

## 29 **Results**

30 Here, we use Illumina whole-genome sequence data from Phase 2 of the *Anopheles gambiae* 1000  
31 Genomes Project (Ag1000G) to examine genetic variation in the *Cyp6m2* gene across 16 populations  
32 in 13 countries comprising *Anopheles gambiae* and *Anopheles coluzzii* mosquitoes. We find 15  
33 missense biallelic substitutions at high frequency (defined as >5% frequency in one or more  
34 populations), that fall into five distinct haplotype groups that carry the main high frequency variants:  
35 A13T, D65A, E328Q, Y347F, I359V and A468S. We examine whether these alleles show evidence of  
36 selection either through potentially modified enzymatic function or by being linked to variants that  
37 change the transcriptional profile of the gene. Despite consistent reports of *Cyp6m2* upregulation and  
38 metabolic activity in insecticide resistant Anophelines, we find no evidence of directional selection  
39 occurring on these variants or on the haplotype clusters in which they are found.

## 40 **Conclusion**

41 Our results imply that emerging resistance associated with *Cyp6m2* is potentially driven by distant  
42 regulatory loci such as transcriptional factors rather than by its missense variants, or that other genes  
43 are playing a more significant role in conferring metabolic resistance.

## 44 **Keywords**

45 Mosquito; *Cyp6m2*; metabolic resistance; allelic variants; selection

## 46 **Background**

47 Malaria remains a pernicious public health problem that plagues the African region, which has over  
48 90% of the world's malaria cases and deaths [1]. Although concerted vector control interventions such  
49 as long lasting insecticidal nets (LLINs) and indoor residual spraying (IRS) have led to the attainment  
50 of key milestones, global progress has stagnated and case numbers are stable or on the rise in many  
51 countries in Africa [1-3]. This is due to multiple factors, including the emergence of insecticide  
52 resistance, which threaten the effectiveness of vector control interventions [4].

53 The most well understood mechanisms of insecticide resistance are classified into two main functional  
54 categories depending on the underlying genes involved: target-site insensitivity and metabolic  
55 sequestration and detoxification. Both types may occur concurrently within a single population or even  
56 within a single mosquito [5-7]. These mechanisms have led to increasing resistance to all four  
57 common insecticide classes — pyrethroids, organochlorines, carbamates and organophosphates — in  
58 all major malaria vectors across Africa [7, 8].

59 Metabolic detoxification occurs mainly through the elevated activity of large and functionally diverse  
60 multigene enzyme families: glutathione S-transferases (GSTs), carboxylesterases (COEs) and  
61 cytochrome P450 monooxygenases (P450s) [7, 9]. Although a few candidates in these enzyme  
62 families have been directly associated with resistance, our understanding of metabolic resistance has  
63 lagged far behind that of pyrethroid target-site resistance, chiefly due to its complexity and the lack of  
64 associated causal mutations [10]. This is despite the fact that metabolic resistance is often considered  
65 a greater threat to mosquito control [9], especially since the only widely accepted occurrence of  
66 malaria vector control failure was attributed to the elevated expression of resistance-associated  
67 P450s in *An. funestus* [11-13]. A comprehensive understanding of metabolic resistance must  
68 therefore involve disambiguating the roles that individual enzymes play and the genetic backgrounds  
69 that underlie their significance in vector populations.

70 The CYP6M2 enzyme exhibits complex insecticide metabolism associated with multiple binding  
71 modes for insecticides [14]. Its gene is located within a cluster of 14 Cyp6 P450 genes on  
72 chromosome 3R of *An. gambiae* [15], and is among the 111 known P450 genes across the *An.*

73 *gambiae* genome [16, 17]. In this genomic region, *Cyp6m2* is nested within a sub-cluster of P450s  
74 containing *Cyp6m3* and *Cyp6m4* which have also been associated with xenobiotic detoxification[18].

75 *Cyp6m2* is notably one of the few specific P450s that have shown a consistent association with  
76 metabolic resistance [5]. Metabolic resistance is mainly assessed through transcriptional profiling of  
77 genes involved in xenobiotic detoxification. Transcriptomic experiments such as quantitative PCR and  
78 microarray assays have established a link between *Cyp6m2* overexpression and the resistance  
79 phenotype in field populations of *An. gambiae*, *An. coluzzii*, *An. arabiensis* and *An. sinensis*,  
80 irrespective of the presence of knock-down resistance (*kdr*) mutations such as L995F or L995S in the  
81 voltage gated sodium channel (VGSC) [5, 19-21]. In DDT resistant *An. gambiae* in Ghana, *Cyp6m2*  
82 has been found to be overexpressed 3.2 to 5.2-fold in combination with the upregulation of additional  
83 P450s like *Cyp6z2* [18]. In DDT resistant *An. coluzzii* collected in Benin, *Cyp6m2* was also found to  
84 be overexpressed 1.2 to 4.6-fold in combination with *Gste2* from the *GST* gene family and in the  
85 presence of fixed *kdr* alleles in the *Vgsc* gene [22]. In Nigeria, the 2.4 to 2.7-fold upregulation of  
86 *Cyp6m2* was found to be associated with high levels of permethrin resistance [5] and *An. gambiae*  
87 that exhibited a strong resistance to bendiocarb in Côte d'Ivoire also had an elevated (up to 8-fold)  
88 expression of the *Cyp6m2* gene [20]. In the same study, transgenic expression of *Cyp6m2* in  
89 *Drosophila melanogaster* was shown to produce resistance to both DDT and bendiocarb. *In vivo*  
90 functional analysis of multi-tissue overexpression induced by genetic modification has also shown  
91 *Cyp6m2* to be sufficient in conferring resistance to permethrin and deltamethrin [23]. However, this  
92 overexpression also increased the mosquitoes' susceptibility to the organophosphate malathion.  
93 Collectively, these studies indicate that *Cyp6m2* can confer metabolic resistance against insecticides  
94 in 3 of the 4 known classes: both type I and type II pyrethroids [14, 18, 23], organochlorines [24], and  
95 carbamates [20]. It therefore has a high potential for cross-resistance, which may make the problem  
96 of malaria vector control even more intractable by limiting the options available to malaria control  
97 programs for insecticide rotation or combination. The negative cross-resistance associated with  
98 malathion hereby points to potential mitigating strategies [23].

99 The frequent association of *Cyp6m2* with insecticide resistance described above warrants further  
100 investigation into whether there is evidence of copy number variation (CNV) or missense mutations at  
101 the locus. CNVs have been implicated in augmenting gene dosage leading to increased transcription

102 of metabolic enzymes [25, 26]. A genome-wide CNV analysis conducted on the Ag1000G dataset and  
103 described in detail elsewhere [25] found CNVs to be significantly enriched in metabolic resistance-  
104 associated gene families and to be undergoing positive selection. These CNVs were identified across  
105 P450s (such as *Cyp9k1* and at both the *Cyp6z3–Cyp6z1* and the *Cyp6aa1–Cyp6p2* gene clusters)  
106 and GSTs (at the *Gstu4–Gste3* cluster). However, CNVs across the *Cyp6m2* locus were found to be  
107 rare, even in populations that are known to exhibit *Cyp6m2*-mediated resistance [25]. This indicates  
108 that CNVs alone are not sufficient to explain the widespread occurrence of the *Cyp6m2*-associated  
109 resistance phenotype: additional factors such as allelic variation might contribute to resistance  
110 associated with *Cyp6m2* activity.

111 Allelic variation can play an additional role in P450-mediated resistance by modifying either enzyme  
112 catalytic activity or gene expression levels [27]. Allelic variation has been shown to be key in inducing  
113 high metabolic efficiency of *Cyp6P9b* and in conferring metabolic resistance to *An. funestus* [28].  
114 Allelic variants in metabolic genes have also been identified to reliably and reproducibly associate with  
115 resistance, such as in *Cyp4J5* and *Coeae1d* in *An. gambiae*, and can serve as diagnostic markers of  
116 phenotypic resistance [29]. However, there is still a paucity of information about allelic variation  
117 associated with metabolic resistance when compared to the well-characterized target-site mutations  
118 [29]. Mutations that may modulate metabolic resistance by either altering function or modifying  
119 expression in *Cyp6m2* are yet to be described.

120 Following the consistent association of *Cyp6m2* with insecticide resistance in many populations, we  
121 examine whole-genome Illumina sequence data from phase 2 of the *Anopheles gambiae* 1000  
122 Genomes Project (Ag1000G) [30] which consists of 1,142 wild-caught mosquitoes sequenced to a  
123 mean depth above 14x, and report a comprehensive analysis of genetic variation within the *Cyp6m2*  
124 gene. We also examine the wider haplotypes around *Cyp6m2* spanning across the *Cyp6m* sub cluster  
125 and the larger *Cyp6* supercluster for signatures of selection.

## 126 **Results**

### 127 ***Cyp6m2* non-synonymous nucleotide variation**

128 Short-read whole-genome sequence data from the Ag1000G phase 2 data resource [30] were used to  
129 investigate genetic variation at the *Cyp6m2* locus across 16 populations of *An. gambiae* and *An.*



|       |    |      |     |     |      |     |     |      |     |    |      |     |      |      |      |      |      |   |     |
|-------|----|------|-----|-----|------|-----|-----|------|-----|----|------|-----|------|------|------|------|------|---|-----|
| 69291 | A> | D65  | 6.0 | 0   | 0    | 0   | 0   | 0    | 0.5 | 0  | 1.9  | 4.2 | 2.7  | 3.8  | 42.8 | 2.7  | 0    | 0 | 52. |
| 02    | C  | A    |     |     |      |     |     |      |     |    |      |     |      |      |      |      |      |   | 1   |
| 69293 | A> | K156 | 0.4 | 0   | 0    | 0   | 0   | 0    | 0   | 0  | 0    | 0   | 0    | 0    | 1.4  | 0    | 44.4 | 0 | 0   |
| 75    | T  | I    |     |     |      |     |     |      |     |    |      |     |      |      |      |      |      |   |     |
| 69295 | A> | N20  | 0.4 | 0   | 0    | 0   | 0   | 0    | 0   | 0  | 0    | 0   | 0    | 0    | 1.4  | 0    | 44.4 | 0 | 0   |
| 06    | G  | 0D   |     |     |      |     |     |      |     |    |      |     |      |      |      |      |      |   |     |
| 69297 | T> | S288 | 1.1 | 0   | 5.5  | 0.7 | 0.7 | 0    | 0   | 0  | 0.8  | 4.2 | 2.7  | 1.3  | 0.7  | 1.3  | 0    | 0 | 0   |
| 70    | A  | T    |     |     |      |     |     |      |     |    |      |     |      |      |      |      |      |   |     |
| 69298 | G> | E325 | 1.2 | 0   | 7.3  | 3.3 | 2.1 | 0    | 3.8 | 2. | 0    | 0   | 0.5  | 0    | 0    | 0    | 0    | 0 | 0   |
| 81    | A  | K    |     |     |      |     |     |      |     | 3  |      |     |      |      |      |      |      |   |     |
| 69298 | G> | E328 | 2.9 | 0.6 | 13.6 | 7.3 | 7   | 12.5 | 9.9 | 6. | 0.3  | 0   | 0    | 0    | 0    | 0    | 0    | 0 | 0   |
| 90    | C  | Q    |     |     |      |     |     |      |     | 2  |      |     |      |      |      |      |      |   |     |
| 69299 | A> | Y347 | 2.4 | 0   | 0    | 0   | 0   | 0    | 0   | 0  | 0.2  | 0   | 0    | 0    | 0    | 1.8  | 0    | 0 | 52. |
| 48    | T  | F    |     |     |      |     |     |      |     |    |      |     |      |      |      |      |      |   | 1   |
| 69299 | A> | I359 | 16. | 0   | 4.5  | 0   | 7   | 37.5 | 16. | 20 | 19.4 | 25  | 17.4 | 16.3 | 48.6 | 19.6 | 0    | 0 | 0   |
| 83    | G  | V    | 0   |     |      |     |     |      | 5   |    |      |     |      |      |      |      |      |   |     |
| 69302 | C> | P407 | 0.7 | 0   | 2.7  | 0.7 | 7   | 0    | 0   | 0  | 0.2  | 0   | 0    | 0    | 0    | 0    | 0    | 0 | 0   |
| 06    | T  | L    |     |     |      |     |     |      |     |    |      |     |      |      |      |      |      |   |     |
| 69302 | A> | E419 | 0.4 | 5.1 | 0    | 0   | 0   | 0    | 0   | 0  | 0    | 0   | 0    | 0    | 0    | 0    | 0    | 0 | 0   |
| 42    | T  | V    |     |     |      |     |     |      |     |    |      |     |      |      |      |      |      |   |     |
| 69302 | A> | K428 | 2.0 | 0   | 0    | 0.7 | 0   | 0    | 0.5 | 0. | 3.5  | 0   | 2.7  | 2.5  | 0.7  | 6.3  | 0    | 0 | 0   |
| 69    | G  | R    |     |     |      |     |     |      | 8   |    |      |     |      |      |      |      |      |   |     |
| 69303 | G> | A468 | 2.6 | 0   | 0    | 0   | 0   | 0    | 0   | 0  | 0.3  | 0   | 0    | 0    | 42   | 0    | 0    | 0 | 0   |
| 88    | T  | S    |     |     |      |     |     |      |     |    |      |     |      |      |      |      |      |   |     |

154 <sup>1</sup>Position relative to the Agamp4 reference sequence, chromosome 3R.

155 <sup>2</sup>Codon numbering according to *Anopheles gambiae* AGAP008212-RA transcript in geneset Agamp4.12.

156 <sup>3</sup>AOcol=Angola *coluzzii*; GHcol=Ghana *coluzzii*; BFcol=Burkina Faso *coluzzii*; Cicol=Côte d'Ivoire *coluzzii*; GNcol=Guinea  
157 *coluzzii*; GW=Guinea Bissau; GM = The Gambia; CMgam=Cameroon; GHgam = Ghana *gambiae*; BFgam = Burkina Faso  
158 *gambiae*; NGgam = Guinea *gambiae*; GAgam=Gabon *gambiae*; UGgam=Uganda *gambiae*; GQgam = Equatorial Guinea  
159 *gambiae*; FRgam=Mayotte *gambiae*; KE=Kenya.

160

## 161 **Haplotypic backgrounds of non-synonymous alleles**

162 The Ag1000G data resource contains data that not only spans across exonic regions of any given  
163 gene, but also intronic and intergenic regions. This enables a comprehensive analysis of haplotypes

164 that contain putative insecticide resistance alleles, but is constrained by the fact that this resource  
165 does not contain samples whose resistance status or *Cyp6m2* expression levels are known.

166 Selection pressure acting upon missense variants or linked cis regulatory variants is likely to affect the  
167 haplotype structure of the gene. To study haplotype structure at *Cyp6m2*, we extracted biallelic SNPs  
168 across the entire 1689bp *Cyp6m2* gene to calculate the number of SNP differences between all pairs  
169 of 2,284 haplotypes derived from the mosquitoes. We identified a clustering threshold of seven SNPs

170 where the haplotype clusters corresponded to the haplotypes carrying the high frequency alleles  
171 [Table 1, Figure 1]. We found that these haplotypes could mostly be grouped into five distinct clusters  
172 (labelled C1-C5): C1 contained haplotypes carrying **A13T**; C2 contained most haplotypes carrying  
173 **D65A**, **A468S**, and some haplotypes carrying **I359V**; C3 contained most haplotypes carrying both  
174 **D65A** and **Y347F**, and C5 contained haplotypes carrying **E328Q**. **C4** contained haplotypes with no  
175 signature missense mutation [Figure 1].

176

### 177 **Figure 1. Hierarchical clustering of *Cyp6m2* haplotypes.**

178

179 Top: a dendrogram showing hierarchical clustering of haplotypes derived from wild-caught mosquitoes.

180 The colour bar indicates the population of origin for each haplotype.

181 Bottom: high frequency (>5%) alleles identified within each haplotype (white = reference allele; black = alternative allele). The

182 lowest margin labels the major haplotype clusters.

183 Overall, haplotype cluster distribution resembled the whole genome groupings of individuals described  
184 elsewhere using our dataset [30]: Cluster C5 contained haplotypes from West African *An. coluzzii*; C4  
185 contained *An. gambiae* from West, Central and near-East Africa; and the rest of the clusters  
186 contained haplotypes from samples from a single country and species [Figure 2]. The variation across  
187 the haplotypes largely showed no strict or systematic difference between the two species or across  
188 broad geographic regions, which is in line with recent whole genome sequencing reports [31].

### 189 **Figure 2. Map of haplotype cluster frequencies and distribution.**

190

191 Each pie chart indicates the haplotype group frequencies within specific sampling populations. The sizes of the wedges within  
192 the pies are proportional to haplotype group frequencies within the populations. Haplotypes in group C1 carry the **A13T** allele.

193 Haplotypes in group C2 carry **D65A**, **I359V** and **A468S** alleles. Haplotypes in group C3 carry **D65A** and **Y347F** alleles.

194 Haplotypes in group C5 carry the **E328Q** allele. Haplotypes in group C4 had no defining non-synonymous variant, and wild type  
195 (*wt*) haplotypes were all those that did not fall within the C1-C5 clusters.

196

197 We investigated patterns of association among these non-synonymous variants by computing the  
198 normalized coefficient of linkage disequilibrium ( $D'$ ) using haplotypes from the Ag1000G phase 2  
199 resource. Of the two highest frequency variants, **I359V** was found to be in perfect linkage with **A468S**  
200 but this was driven only by one population (Gabon) with most backgrounds carrying **I359V** not



201 showing linkage with any other missense mutations [*Figure 1 & Supplementary Figure 1*]. **D65A** was  
202 in perfect linkage with **A468S** and **Y347F**, showing that **D65A** was almost only ever found on  
203 haplotypes carrying either **A468S** or **Y347F**. **I359V** and **D65A**, the highest frequency mutations across  
204 all populations, were found to be only in moderate linkage disequilibrium (0.36) [*Supplementary*  
205 *Figure 1*]. Other variants were found to be in weak linkage disequilibrium with the six main high  
206 frequency alleles and segregated independently within their own populations. While we observed  
207 some strong associations through linkage disequilibrium analysis across all populations, a deeper  
208 investigation revealed that these associations were driven by population specific dynamics in  
209 populations (such as Kenya) where we know bottlenecking has been an issue [31]. It is therefore  
210 unlikely that the identified variants are conferring some selective advantage against existing  
211 insecticide pressures.

212

213 We next explored whether the surrounding genomic region showed a similar hierarchical clustering  
214 pattern to *Cyp6m2*, which might be indicative of either dominant demographic effects or selection  
215 acting at other linked loci that is having a major impact on variation within *Cyp6m2*. The downstream  
216 genes we selected coded for proteins that were 1-to-1 orthologs with *D. melanogaster* genes. We  
217 selected *ODR2* [32], *HAM* [33] and *SH2* [34], which were 81280 bases, 457164 bases and 1198636  
218 bases downstream of the *Cyp6m2* gene respectively. The distinctive haplotype clustering pattern  
219 observed for *Cyp6m2* in the Kenya, Angola and Gabon populations persisted across these genes,  
220 indicating that in these populations, the diversity reduction in and downstream of *Cyp6m2* is more  
221 likely driven by demography rather than by a selective sweep [*Supplementary Fig. 2-4*]. We also  
222 extracted biallelic SNPs across the *Cyp6m* sub cluster of 3 genes (*Cyp6m2*, *Cyp6m3* and *Cyp6m4*)  
223 and across the *Cyp6* supercluster of 14 genes within which the *Cyp6m* sub cluster is located (*Cyp6s2*,  
224 *Cyp6s1*, *Cyp6r1*, *Cyp6n2*, *Cyp6y2*, *Cyp6y1*, *Cyp6m1*, *Cyp6n1*, *Cyp6m2*, *Cyp6m3*, *Cyp6m4*, *Cyp6z3*,  
225 *Cyp6z2* and *Cyp6z1*), and performed hierarchical clustering across these regions as described above.  
226 The typical geographical stratification of haplotypes persisted, suggesting the absence of a selective  
227 sweep across this region [*Supplementary Fig.5 & 6*].

228

229 We examined the genetic backgrounds carrying these alleles further by constructing median joining  
230 networks (MJNs) [35] using the Ag1000G Phase 2 haplotype data. This enabled us to resolve the

231 radiation of DNA substitutions arising on haplotypes carrying the identified variants. It also allowed us  
232 to reconstruct and position intermediate haplotypes while revealing the non-hierarchical relationships  
233 between haplotypes that could not be resolved by hierarchical clustering alone. The MJNs were  
234 constructed with reference to a maximum edge distance of two SNPs. This ensured that the  
235 connected components captured only closely related haplotypes. The resulting MJNs had a close  
236 correspondence with the hierarchical clustering output in assignment of haplotypes to clusters (88%  
237 overall concordance across all clusters).

238 The median joining networks showed more clearly the distinctive demographic stratification of the high  
239 frequency variants that was highlighted by the hierarchical clustering networks [Figure 3]. Most nodes  
240 containing secondary variants arising from the main nodes were small, which is inconsistent with  
241 directional selection where larger nodes are expected. Only one of the **I359V** nodes contained  
242 haplotypes from mosquitoes of both species, however the secondary nodes did not contain  
243 haplotypes from more than one species. This indicates that although **I359V** is shared by both *An.*  
244 *gambiae* and *An. coluzzii*, it is unlikely that this is because of an introgression event across the  
245 *Cyp6m2* gene.

### 246 **Figure 3. Haplotype networks.**

247 Median joining network for haplotypes carrying **A13T**, **D65A**, **E328Q**, **Y347F**, **I359V** and **A468S**, with a maximum edge distance  
248 of two SNPs. Node size indicates haplotype counts and node colour indicates the population/species of haplotypes.  
249 AO=Angola; GH=; BF=Burkina Faso; CI=Côte d'Ivoire; GN=Guinea; CM=Cameroon; GW=Guinea Bissau; GM = The Gambia;  
250 GA=Gabon; UG=Uganda; FR=Mayotte; GQ=Equatorial Guinea; KE=Kenya.

251

### 252 **Positive selection of non-synonymous alleles**

253 Extended Haplotype Heterozygosity (EHH) decay [36] was calculated to explore evidence for  
254 directional selection on the haplotypes carrying high frequency non-synonymous variants. It is  
255 expected that the presence of ongoing or recent directional selection pressure would lead to the  
256 increase in frequency of haplotypes, which on average will have longer regions of haplotype  
257 homozygosity relative to haplotypes that are not under selection. This diversity reduction would  
258 produce signatures of selection that would be conspicuous across a large genomic region. EHH

259 analysis would therefore be able to detect diversity reduction caused by ongoing directional selection  
260 being driven either by amino acid substitutions identified within the gene or by mutations within *cis*-  
261 acting elements next to the gene that may be under selection.

262 To perform the EHH decay analysis, we defined a core region of 1689 bases that spans across the  
263 entire gene. This was identical to what was used to differentiate the identified haplotype groups  
264 though hierarchical clustering. This region contained multiple distinct haplotypes above 1% frequency  
265 within the cohort, including haplotypes corresponding to the C1-C5 haplotype clusters. All haplotypes  
266 that did not correspond to C1-C5 were considered to be wild type (wt). Although there were several  
267 different haplotypes in each population that fit this description, we do not distinguish between them  
268 and call all these wild type, as *Cyp6m2* has no known resistance alleles and a true wild type remains  
269 to be discovered. EHH decay was then computed for each core haplotype up to 200 kilobases  
270 upstream and downstream [*Supplementary Fig. 7*]: beyond 200 kb, the EHH had decayed to zero.

271 We noted that haplotype clusters containing high frequency variants (C1-C5) did not exhibit a  
272 significantly slower EHH decay relative to the wild types, showing no evidence of positive selection.  
273 However, one Kenyan wild type haplotype group had a dramatically slower EHH decay relative to wild  
274 type haplotypes from other populations. In order to account for this difference within wild type groups  
275 across multiple populations and to reveal potential signs of selection that would be obscured by a  
276 collective analysis across all populations, we separated the haplotypes by population and species and  
277 recomputed EHH decay for each core haplotype as above.

#### 278 **Figure 4. Extended haplotype homozygosity per population.**

279 No evidence for drastic difference in linkage disequilibrium within populations around core haplotypes across *Cyp6m2*.  
280 Extended Haplotype Heterozygosity (EHH) decay was calculated around cluster (C1 to C5) and non-cluster (wt) haplotypes  
281 using SNPs across and flanking the *Cyp6m2* region. KE=Kenya, GAgam=Gabon *An. gambiae*, AOcol= Angola *An. coluzzii*,  
282 GW=Guinea Bissau, Clcol=Côte d'Ivoire *An. coluzzii*, GHcol=Ghana *An. coluzzii*.

283 Kenyan mosquito populations are known to have an extreme demographic history, as they have  
284 experienced a severe recent bottleneck, and the Angola and Gabon populations are known to be  
285 geographically unique populations which are strongly differentiated from all other populations[31].  
286 Hence, their haplotypes exhibited a considerably slower decay than West African haplotypes [*first*  
287 *three panels: Figure 4*]. However, the putative resistance haplotypes C1-C5 did not experience a

288 slower EHH decay relative to their wild type haplotypes, showing no evidence of positive selection  
289 acting upon those haplotypes in those populations.

290 As expected, the West African *An. coluzzii* haplotypes exhibited a much faster decay of EHH than  
291 specimens from Kenya, Angola, or Gabon, highlighting the demographic differences previously  
292 observed for these collections [31] [*last three panels, Figure 4*]. The C5 haplotype was a promising  
293 candidate for potential selection as it occurred within a more diverse population, and it was interesting  
294 to note that some wild type haplotypes in Côte d'Ivoire's *An. coluzzii* had a slightly slower decay than  
295 others within West Africa [*fifth panel, Figure 4*]. However, these haplotypes were not part of the C5  
296 cluster, and did not carry the widespread **E328Q** mutation. The C5 haplotype did not exhibit a  
297 dramatically slower decay of EHH than wild type haplotypes in the populations in which it was found,  
298 suggesting that it is not under positive selection.

## 299 **Discussion**

300 *Cyp6m2* has been implicated in many *Anopheles* populations as a key P450 that contributes to the  
301 insecticide resistance phenotype [5, 14, 20, 24]. It has been reported that allelic variants across some  
302 P450s can affect enzyme conformational dynamics and substrate binding affinity [28], offering  
303 potential mechanisms that may modulate enzyme activity and efficiency, and thus account for  
304 additional *Cyp6m2* resistance where CNVs alone may not suffice. However, little is also known about  
305 *Cyp6m2* allelic variation across Africa.

306 In this study, we report a comprehensive account of the distribution of amino acid substitutions  
307 occurring within the *Cyp6m2* gene. We also examine the haplotype structure of the gene to probe for  
308 selective sweeps by performing hierarchical clustering of haplotypes. We also examine the genetic  
309 background upon which the missense variants are found by plotting both median joining networks and  
310 decay of extended haplotype homozygosity, which are useful for revealing signatures of selection. We  
311 note that the distinct haplotype groups therein are stratified demographically and largely correspond to  
312 signature missense variants found in specific populations. This is in contrast to the strong signals of  
313 recent positive selection at other cytochrome P450 gene loci such as at *Cyp6p3* [31] which is often  
314 upregulated in tandem with *Cyp6m2* in multiple pyrethroid resistant populations [5, 37, 38].

315 It is still unclear how the identified non-synonymous variants may modulate *Cyp6m2* binding activity,  
316 in either the presence or absence of multiple competitive substrates and metabolites. The two  
317 aromatic residues (Phe 108 and Phe 121) that have been previously identified to be vital in  
318 deltamethrin orientation in the *Cyp6m2* active site[14] were not found to contain high frequency  
319 variants in our dataset.

320 None of the haplotype groups identified that carried missense variants were found to be under  
321 directional selection. This is despite the existence of a widespread variant (**E328Q**) linked to a  
322 geographic region (West Africa) where *Cyp6m2* upregulation has been associated with emerging  
323 metabolic resistance [20, 37]. In *An. coluzzii* originating from both Côte d'Ivoire and Ghana, the C5  
324 haplotype that carried **E328Q** was shown to have an even faster decay of EHH than the wild type  
325 haplotypes, further indicating an absence of directional selection. The stratification of other main  
326 haplotype clusters from Angola (C1), Gabon (C2) and Kenya (C3) was also consistent with the strong  
327 demographic differentiation and overall reduced heterozygosity of these populations described  
328 elsewhere [31].

329 While the genomic data quality across the *Cyp6m2* gene and its putative promoter region was  
330 satisfactory, there was a ~10,000 base region of inaccessibility upstream of *Cyp6m2* that cut across  
331 the intergenic region into *Cyp6n1* [39]. A similar inaccessible region was also present 1 kb  
332 downstream of the gene in the intergenic region between *Cyp6m2* and *Cyp6m3*, which is likely  
333 caused by the presence of repeats that inhibit read mapping. Although it is possible that the upstream  
334 region of inaccessibility could contain a regulatory variant that is susceptible to selection, it is unlikely  
335 to obscure signatures of selection.

336 It has been shown in multiple studies that target-site resistance (i.e. VGSC-*kdI*) provides a strong  
337 persistent baseline of resistance as it rises towards fixation within populations [40]. In the presence of  
338 insecticide selection pressure, target-site mutations and metabolic resistance have also been shown  
339 to act synergistically to confer a stronger resistance phenotype to pyrethroids [29, 41]. While  
340 signatures of selection have previously been identified in some metabolic gene clusters within  
341 populations that have a high *kdI* frequency[31], further studies need to examine whether directional  
342 selection occurring on one locus can obscure selection on another locus. To resolve this conundrum,  
343 genomic analysis must be performed on populations sampled across generations and whose

344 transcriptomic and phenotypic characteristics are known, in order to tease out the individual  
345 contributions of specific sources of resistance.

346 Independent studies employing different experimental designs have also shown that metabolic  
347 resistance manifests as a cascade of multiple upregulated genes [42]. These genes, like *Cyp6m2*, are  
348 part of the normal cellular mechanism for xenobiotic detoxification that involves a linked, coordinated  
349 response of large multi-gene enzyme families in complicated pathways. Therefore, it is likely that  
350 identifying signatures of selection due to insecticide pressure will involve thorough analysis across this  
351 vast network. The Cap 'n' Collar isoform-C (CncC) transcription factor sub-family has been shown to  
352 work in tandem with other transcription factors to regulate the transcription of phase I, II and III  
353 detoxification loci of multiple insects such as *Culex quinquefasciatus* and *D. melanogaster* [43, 44].  
354 *CncC* knockdown or upregulation has been shown to directly affect phenotypic resistance in  
355 *Anopheles gambiae* as well, modulating the expression of key P450s enzymes such as *Cyp6z2*,  
356 *Cyp6z3* and *Cyp6m2* that are located in the same genomic region[43, 44]. Given that we have  
357 detected no evidence of selection on amino acid variants in the *Cyp6m2* gene, it is possible that the  
358 emergence of *Cyp6m2* associated resistance is being driven by selection pressures acting upon  
359 genes coding for distant regulatory proteins such as transcription factors. These transcription factors  
360 can regulate downstream gene expression across large genomic distances. These transcription  
361 factors have also been implicated in the differential expression of other detoxification enzyme families  
362 also associated with insecticide resistance (GSTs, COEs, UDP-glucuronosyltransferases (UGTs) and  
363 ABC transporters). It is therefore likely that the centre of selection leading to the *Cyp6m2* associated  
364 resistance phenotype will be identified through whole genome selection scans of susceptible and  
365 resistant populations rather than by single loci analysis. Further research on Anopheline epigenomics,  
366 transcriptomics, proteomics and systems biology will also be game changers in mapping the complex  
367 regulatory network of insecticide resistance, aiding the identification of critical targets and the  
368 development of new strategies to control the spread of metabolic insecticide resistance.

## 369 **Conclusion**

370 The scale up of insecticide-based interventions has caused increased selection pressure and higher  
371 levels of insecticide resistance across Africa. While the *CYP6M2* enzyme has been associated with  
372 emerging metabolic resistance in Africa, our data indicates that allelic variation within the *Cyp6m2*

373 gene itself or across its Cyp6 supercluster has not been subject to recent positive selection in any of  
374 the populations sampled. This is in contrast to other Cytochrome P450 genes where CNV alleles are  
375 clearly under strong selection. Our results do not rule out a role for *Cyp6m2* in insecticide resistance  
376 in natural populations, but highlight the need for a deeper understanding of the regulatory networks  
377 affecting Cytochrome P450 gene expression in malaria vectors. This will require large-scale, holistic  
378 experimental work that collects genomic, transcriptomic and phenotypic datasets which when  
379 juxtaposed can resolve the complexities of metabolic resistance.

## 380 **Methods**

### 381 **Data collection and analysis**

382 In this study, we followed the species nomenclature of Coetzee *et al* [45] where *An. gambiae* refers to  
383 *An. gambiae sensu stricto* (S form) and *An. coluzzii* refers to *An. gambiae sensu stricto* (M form). A  
384 detailed description of the Ag1000G sample collection, DNA extraction, sequencing, variant calling,  
385 quality control and phasing can be found here [31]. Briefly, Anopheline samples were collected from  
386 33 sampling sites across 16 populations in 13 countries in sub-Saharan Africa [*Table 1 & Additional*  
387 *file 1*]. The sampling procedure covered different ecosystems and aimed at collecting a minimum of  
388 30 specimens per country. The specimens consisted of *An. gambiae* and *An. coluzzii*: only *An.*  
389 *coluzzii* were sampled from Angola, both *An. gambiae* and *An. coluzzii* were sampled from Burkina  
390 Faso, while all other populations consisted of *An. gambiae*, except Kenya and Guinea Bissau where  
391 the species identity was indeterminate.

392 Whole genome sequencing of all mosquitoes was performed on the Illumina HiSeq 2000 platform.  
393 The generated 100 base paired-end reads were aligned to the *An. gambiae* AgamP3 reference  
394 genome assembly [46] and variants were called using GATK UnifiedGenotyper. Samples with mean  
395 coverage  $\leq 14\times$  and variants with attributes that correlated with Mendelian error in genetic crosses  
396 were removed during quality control.

397 The SnpEff v4.1b software was used for the functional annotation of Ag1000G variant data [47] using  
398 locations from geneset AgamP4.12. All variants in transcript AGAP008212-RA with a SnpEff



399 annotation of “missense” were regarded as nonsynonymous variants. The *Cyp6m2* gene has not  
400 been shown to exhibit alternative splicing, and no alternative transcripts have been reported.

#### 401 **Haplotype clustering, linkage disequilibrium and mapping of haplotype clusters**

402 To reveal the haplotype structure at *Cyp6m2*, *Cyp6m* sub-cluster, *Cyp6* supercluster, *HAM*, *ODR-2*  
403 and *SH2*, we computed the Hamming distance between all haplotype pairs and performed  
404 hierarchical clustering of haplotypes. We worked through arbitrary clustering threshold values to cut  
405 the dendrograms at genetic distances that would best highlight the most relevant clusters. We used  
406 Lewontin's  $D'$  [48] to compute the linkage disequilibrium (LD) between all pairs of missense *Cyp6m2*  
407 mutations. Image rendering for the haplotype clustering, linkage disequilibrium and haplotype cluster  
408 frequencies map was performed using the matplotlib Python package [49]. Geography handling for  
409 the haplotype cluster frequencies map was done using cartopy [50].

#### 410 **Haplotype Networks**

411 We constructed haplotype networks using the median-joining algorithm [35] implemented in Python  
412 [51]. Haplotypes carrying the main high frequency mutations were analysed with a maximum edge  
413 distance of two SNPs. The Graphviz library was used to render the networks and the composite figure  
414 was constructed in Inkscape [52].

#### 415 **Extended haplotype homozygosity**

416 We defined the core haplotype on a 1689 base region spanning the *Cyp6m2*, from chromosome arm  
417 3R, starting at position 6928858 and ending at position 6930547. We selected this region to ensure a  
418 1:1 haplotype correspondence with that used in the hierarchical clustering analysis. We computed  
419 extended haplotype homozygosity (EHH) across all core haplotypes in all populations as described in  
420 Sabeti et al. [36] using scikit-allel version 1.1.9 [53]. EHH composite plots were made using the  
421 matplotlib Python package [49].

#### 422 **List of abbreviations**

423 CncC: Cap 'n' Collar isoform-C  
424 CNV: Copy Number Variation



425 COEs: Carboxylesterases  
426 DDT: Dichlorodiphenyltrichloroethane  
427 EHH: Extended Haplotype Heterozygosity  
428 GSTs: Glutathione S-Transferases  
429 HAM: Transcription Factor Hamlet  
430 IRS: Indoor Residual Spraying  
431 *kdr*: Knock-Down Resistance  
432 LLINs: Long Lasting Insecticidal Nets  
433 MJNs: Median-Joining Networks  
434 ODR2: Odd-Skipped Related  
435 SH2: SRC Homology 2  
436 SNPs: Single Nucleotide Polymorphisms  
437 P450s: Cytochrome P450 Monooxygenases  
438 UGTs: UDP-glucuronosyltransferases  
439 VGSC: Voltage Gated Sodium Channel  
440 *wt*: wild type  
441

## 442 **Declarations**

## 443 **Acknowledgements**

444 The authors would like to thank the staff of the Wellcome Sanger Institute Sequencing and Informatics  
445 facilities for their contributions.

446

## 447 **Availability of data and materials**

448 Jupyter Notebooks and scripts containing all analyses, tables and figures can be found in the GitHub  
449 repository [51]. Variant calls and phased haplotype data from the Ag1000G Phase 2 AR3 data release  
450 were used, and can be found here [54].

451

452 **Authors contribution**

453 AM and MKNL designed the study. AM and CC developed the base code. MGW and AM performed  
454 all analyses. MGW drafted the manuscript. All authors read and approved the final manuscript.

455

456 **Competing interests statement**

457 The authors declare no competing interests.

458

459 **Consent for publication**

460 Not applicable

461

462 **Ethics approval and consent to participate**

463 Not applicable.

464

465 **Funding**

466 The Wellcome Sanger Institute is funded by the Wellcome Trust (grant 206194/Z/17/Z), which  
467 supports M.K.N.L. and part of the sequencing, analysis, informatics, and management of the  
468 *Anopheles gambiae* 1000 Genomes Project.

469

470

## 471 **Supplementary Figures**

### 472 **Supplementary Figure 1. Linkage disequilibrium ( $D'$ ) between non-synonymous variants.**

473

474 A value of 1 shows perfect linkage between the alleles. A value of -1 shows that the alleles are never found conjointly. The bar

475 plot indicates allele frequencies within the Ag1000G phase 2 cohort.

476

### 477 **Supplementary Figure 2. Hierarchical clustering and missense mutations for *ODR2*.**

478 Top: a dendrogram showing hierarchical clustering of haplotypes across the *ODR2* gene. The gene is located at position

479 7,059,422 to 7,119,244: 128,875 bases downstream of *Cyp6m2*.

480 The colour bar indicates the population of origin for each haplotype.

481 Bottom: high frequency (>5%) alleles identified within each haplotype (white = reference allele; black = alternative allele).

482

### 483 **Supplementary Figure 3. Hierarchical clustering and missense mutations for *HAM*.**

484 Top: a dendrogram showing hierarchical clustering of haplotypes across the *HAM* gene. The gene is located at position

485 7,435,306 to 7,485,012: 504,759 bases downstream of *Cyp6m2*.

486 The colour bar indicates the population of origin for each haplotype.

487 Bottom: high frequency (>5%) alleles identified within each haplotype (white = reference allele; black = alternative allele).

488

### 489 **Supplementary Figure 4. Hierarchical clustering and missense mutations for *SH2*.**

490 Top: a dendrogram showing hierarchical clustering of haplotypes across the *SH2* gene. The gene is located at position

491 8,176,778 to 8,183,084: 1,246,231 bases downstream of *Cyp6m2*.

492 The colour bar indicates the population of origin for each haplotype.

493 Bottom: high frequency (>5%) alleles identified within each haplotype (white = reference allele; black = alternative allele).

494

### 495 **Supplementary Figure 5. Hierarchical clustering and missense mutations for *Cyp6m* sub**

496 **cluster.**

497 Top: a dendrogram showing hierarchical clustering of haplotypes across the Cyp6m sub cluster of genes containing Cyp6m2,  
498 Cyp6m3 and Cyp6m4. The genes are located at position 6928858 to 6935721.  
499 The colour bar indicates the population of origin for each haplotype.  
500 Bottom: high frequency (>5%) alleles identified within each haplotype (white = reference allele; black = alternative allele).  
501

502 **Supplementary Figure 6. Hierarchical clustering and missense mutations for Cyp6**  
503 **supercluster.**

504 Top: a dendrogram showing hierarchical clustering of haplotypes across the Cyp6 supercluster of 14 P450 genes containing  
505 Cyp6s2, Cyp6s1, Cyp6r1, Cyp6n2, Cyp6y2, Cyp6y1, Cyp6m1, Cyp6n1, Cyp6m2, Cyp6m3, Cyp6m4, Cyp6z3, Cyp6z2 and  
506 Cyp6z1. The genes are located at position 6903106 to 6978142.  
507 The colour bar indicates the population of origin for each haplotype.  
508 Bottom: high frequency (>70%) alleles identified within each haplotype (white = reference allele; black = alternative allele).  
509

510 **Supplementary Figure 7. Extended haplotype homozygosity across all populations.**

511 A rapid decay of EHH in comparison to other haplotypes implies absence of positive selection.

512

513 **References**

- 514 1. WHO: **World Malaria Report 2019**. 2019.  
515 2. Bhatt S, Weiss DJ, Cameron E, Bisanzio D, Mappin B, Dalrymple U, Battle K, Moyes  
516 CL, Henry A, Eckhoff PA *et al*: **The effect of malaria control on Plasmodium**  
517 **falciparum in Africa between 2000 and 2015**. *Nature* 2015, **526**(7572):207-211.  
518 3. Cibulskis RE, Alonso P, Aponte J, Aregawi M, Barrette A, Bergeron L, Fergus CA,  
519 Knox T, Lynch M, Patouillard E *et al*: **Malaria: Global progress 2000 - 2015 and**  
520 **future challenges**. *Infect Dis Poverty* 2016, **5**(1):61.  
521 4. Ranson H, Lissenden N: **Insecticide Resistance in African Anopheles**  
522 **Mosquitoes: A Worsening Situation that Needs Urgent Action to Maintain**  
523 **Malaria Control**. *Trends Parasitol* 2016, **32**(3):187-196.  
524 5. Djouaka RF, Bakare AA, Coulibaly ON, Akogbeto MC, Ranson H, Hemingway J,  
525 Strode C: **Expression of the cytochrome P450s, CYP6P3 and CYP6M2 are**  
526 **significantly elevated in multiple pyrethroid resistant populations of Anopheles**  
527 **gambiae s.s. from Southern Benin and Nigeria**. *BMC Genomics* 2008, **9**:538.  
528 6. Djouaka R, Riveron JM, Yessoufou A, Tchigossou G, Akoton R, Irving H, Djegbe I,  
529 Moutairou K, Adeoti R, Tamò M *et al*: **Multiple insecticide resistance in an**  
530 **infected population of the malaria vector Anopheles funestus in Benin**. *Parasit*  
531 *Vectors* 2016, **9**:453.  
532 7. WHO: **Global report on insecticide resistance in malaria vectors: 2010--2016**.  
533 2018.

- 534 8. **WHO Malaria Threats Map**  
535 [\[https://apps.who.int/malaria/maps/threats/?theme=prevention&mapType=prevention%3A0&bounds=%5B%5B-54.61667525407141%2C-26.993804332606665%5D%2C%5B66.07511128112793%2C35.549094294064915%5D%5D&insecticideClass=PYRETHROIDS&insecticideTypes=&assayTypes=MOL-ECULAR\\_ASSAY%2CBIOCHEMICAL\\_ASSAY%2CSYNERGIST-INSECTICIDE\\_BIOASSAY&synergistTypes=&species=&vectorSpecies=&surveyTypes=&deletionType=HRP2\\_PROPORTION\\_DELETION&plasmodiumSpecies=P\\_FALCIPARUM&drug=DRUG\\_AL&mmType=1&endemicity=false&countryMode=false&storyMode=false&storyModeStep=0&filterOpen=false&filtersMode=filters&years=2010%2C2018\]](https://apps.who.int/malaria/maps/threats/?theme=prevention&mapType=prevention%3A0&bounds=%5B%5B-54.61667525407141%2C-26.993804332606665%5D%2C%5B66.07511128112793%2C35.549094294064915%5D%5D&insecticideClass=PYRETHROIDS&insecticideTypes=&assayTypes=MOL-ECULAR_ASSAY%2CBIOCHEMICAL_ASSAY%2CSYNERGIST-INSECTICIDE_BIOASSAY&synergistTypes=&species=&vectorSpecies=&surveyTypes=&deletionType=HRP2_PROPORTION_DELETION&plasmodiumSpecies=P_FALCIPARUM&drug=DRUG_AL&mmType=1&endemicity=false&countryMode=false&storyMode=false&storyModeStep=0&filterOpen=false&filtersMode=filters&years=2010%2C2018)  
545 9. Ranson H, N'Guessan R, Lines J, Moiroux N, Nkuni Z, Corbel V: **Pyrethroid resistance in African anopheline mosquitoes: what are the implications for malaria control?** *Trends Parasitol* 2011, **27**(2):91-98.  
546  
547 10. Wilding CS, Weetman D, Steen K, Donnelly MJ: **High, clustered, nucleotide diversity in the genome of *Anopheles gambiae* revealed through pooled-template sequencing: implications for high-throughput genotyping protocols.** *BMC Genomics* 2009, **10**:320.  
548  
549 11. Hargreaves K, Koekemoer LL, Brooke BD, Hunt RH, Mthembu J, Coetzee M: ***Anopheles funestus* resistant to pyrethroid insecticides in South Africa.** *Med Vet Entomol* 2000, **14**(2):181-189.  
550  
551 12. Wondji CS, Morgan J, Coetzee M, Hunt RH, Steen K, Black WCt, Hemingway J, Ranson H: **Mapping a quantitative trait locus (QTL) conferring pyrethroid resistance in the African malaria vector *Anopheles funestus*.** *BMC Genomics* 2007, **8**:34.  
552  
553 13. Wondji CS, Irving H, Morgan J, Lobo NF, Collins FH, Hunt RH, Coetzee M, Hemingway J, Ranson H: **Two duplicated P450 genes are associated with pyrethroid resistance in *Anopheles funestus*, a major malaria vector.** *Genome Res* 2009, **19**(3):452-459.  
554  
555 14. Stevenson BJ, Bibby J, Pignatelli P, Muangnoicharoen S, O'Neill PM, Lian L-Y, Müller P, Nikou D, Steven A, Hemingway J *et al*: **Cytochrome P450 6M2 from the malaria vector *Anopheles gambiae* metabolizes pyrethroids: Sequential metabolism of deltamethrin revealed.** *Insect Biochem Mol Biol* 2011, **41**(7):492-502.  
556  
557 15. **Chromosome 3R: 6,928,825-6,930,580 - Region in detail - *Anopheles gambiae* - VectorBase**  
558 [\[https://www.vectorbase.org/Anopheles\\_gambiae/Location/View?db=core:g=AGAP008212;r=3R:6928825-6930580;t=AGAP008212-RA\]](https://www.vectorbase.org/Anopheles_gambiae/Location/View?db=core:g=AGAP008212;r=3R:6928825-6930580;t=AGAP008212-RA)  
559  
560 16. Ranson H, Claudianos C, Orтели F, Abgrall C, Hemingway J, Sharakhova MV, Unger MF, Collins FH, Feyereisen R: **Evolution of supergene families associated with insecticide resistance.** *Science* 2002, **298**(5591):179-181.  
561  
562 17. Ranson H, Paton MG, Jensen B, McCarroll L, Vaughan A, Hogan JR, Hemingway J, Collins FH: **Genetic mapping of genes conferring permethrin resistance in the malaria vector, *Anopheles gambiae*.** *Insect Mol Biol* 2004, **13**(4):379-386.  
563  
564 18. Müller P, Donnelly MJ, Ranson H: **Transcription profiling of a recently colonised pyrethroid resistant *Anopheles gambiae* strain from Ghana.** *BMC Genomics* 2007, **8**:36.  
565  
566 19. Nardini L, Christian RN, Coetzer N, Ranson H, Coetzee M, Koekemoer LL: **Detoxification enzymes associated with insecticide resistance in laboratory strains of *Anopheles arabiensis* of different geographic origin.** *Parasit Vectors* 2012, **5**:113.  
567  
568 20. Edi CV, Djogbénu L, Jenkins AM, Regna K, Muskavitch MAT, Poupardin R, Jones CM, Essandoh J, Kétouh GK, Paine MJ *et al*: **CYP6 P450 enzymes and ACE-1 duplication produce extreme and multiple insecticide resistance in the malaria mosquito *Anopheles gambiae*.** *PLoS Genet* 2014, **10**(3):e1004236.  
569  
570  
571  
572  
573  
574  
575  
576  
577  
578  
579  
580  
581  
582  
583  
584  
585  
586  
587  
588

- 589 21. Yan Z-W, He Z-B, Yan Z-T, Si F-L, Zhou Y, Chen B: **Genome-wide and**  
590 **expression-profiling analyses suggest the main cytochrome P450 genes**  
591 **related to pyrethroid resistance in the malaria vector, *Anopheles sinensis***  
592 **(Diptera Culicidae). *Pest Manag Sci* 2018, **74**(8):1810-1820.**
- 593 22. Djègbè I, Agossa FR, Jones CM, Poupardin R, Cornelie S, Akogbéto M, Ranson H,  
594 Corbel V: **Molecular characterization of DDT resistance in *Anopheles gambiae***  
595 **from Benin. *Parasit Vectors* 2014, **7**:409.**
- 596 23. Adolphi A, Poulton B, Anthousi A, Macilwee S, Ranson H, Lycett GJ: **Functional**  
597 **genetic validation of key genes conferring insecticide resistance in the major**  
598 **African malaria vector, *Anopheles gambiae*. *Proc Natl Acad Sci U S A* 2019,**  
599 **116(51):25764-25772.**
- 600 24. Mitchell SN, Stevenson BJ, Müller P, Wilding CS, Egyir-Yawson A, Field SG,  
601 Hemingway J, Paine MJ, Ranson H, Donnelly MJ: **Identification and validation of**  
602 **a gene causing cross-resistance between insecticide classes in *Anopheles***  
603 ***gambiae* from Ghana. *Proc Natl Acad Sci U S A* 2012, **109**(16):6147-6152.**
- 604 25. Lucas ER, Miles A, Harding NJ, Clarkson CS, Lawniczak MKN, Kwiatkowski DP,  
605 Weetman D, Donnelly MJ, *Anopheles gambiae* Genomes C: **Whole-genome**  
606 **sequencing reveals high complexity of copy number variation at insecticide**  
607 **resistance loci in malaria mosquitoes. *Genome Res* 2019, **29**(8):1250-1261.**
- 608 26. Weetman D, Djogbenou LS, Lucas E: **Copy number variation (CNV) and**  
609 **insecticide resistance in mosquitoes: evolving knowledge or an evolving**  
610 **problem? *Curr Opin Insect Sci* 2018, **27**:82-88.**
- 611 27. Schuler MA, Berenbaum MR: **Structure and function of cytochrome P450s in**  
612 **insect adaptation to natural and synthetic toxins: insights gained from**  
613 **molecular modeling. *J Chem Ecol* 2013, **39**(9):1232-1245.**
- 614 28. Ibrahim SS, Riveron JM, Bibby J, Irving H, Yunta C, Paine MJ, Wondji CS: **Allelic**  
615 **Variation of Cytochrome P450s Drives Resistance to Bednet Insecticides in a**  
616 **Major Malaria Vector. *PLoS Genet* 2015, **11**(10):e1005618.**
- 617 29. Weetman D, Wilding CS, Neafsey DE, Müller P, Ochomo E, Isaacs AT, Steen K,  
618 Rippon EJ, Morgan JC, Mawejje HD *et al*: **Candidate-gene based GWAS identifies**  
619 **reproducible DNA markers for metabolic pyrethroid resistance from standing**  
620 **genetic variation in East African *Anopheles gambiae*. *Sci Rep* 2018, **8**(1):2920.**
- 621 30. Clarkson CS, Miles A, Harding NJ, Lucas ER, Battey CJ, Amaya-Romero JE, Cano  
622 J, Diabate A, Constant E, Nwakanma DC *et al*: **Genome variation and population**  
623 **structure among 1,142 mosquitoes of the African malaria vector species**  
624 **<em>*Anopheles gambiae*</em> and <em>*Anopheles coluzzii*</em>. *bioRxiv***  
625 **2019:864314.**
- 626 31. Consortium TAgG: **Genetic diversity of the African malaria vector *Anopheles***  
627 ***gambiae*. *Nature* 2017, **552**(7683):96-100.**
- 628 32. **Chromosome 3R: 7,059,422 - 7,119,244 - Region in detail - *Anopheles gambiae* -**  
629 **VectorBase [<https://vectorbase.org/vectorbase/app/record/gene/AGAP008222>]**
- 630 33. **Chromosome 3R:7,435,306 - 7,485,012 - *Anopheles gambiae* - VectorBase**  
631 **[<https://vectorbase.org/vectorbase/app/record/gene/AGAP008232>]**
- 632 34. **Chromosome 3R: 8,176,778 - 8,183,084 - Region in detail - *Anopheles gambiae* -**  
633 **VectorBase**  
634 **[<https://vectorbase.org/vectorbase/app/record/gene/AGAP008273>]**
- 635 35. Bandelt HJ, Forster P, Röhl A: **Median-joining networks for inferring intraspecific**  
636 **phylogenies. *Mol Biol Evol* 1999, **16**(1):37-48.**
- 637 36. Sabeti PC, Reich DE, Higgins JM, Levine HZP, Richter DJ, Schaffner SF, Gabriel  
638 SB, Platko JV, Patterson NJ, McDonald GJ *et al*: **Detecting recent positive**  
639 **selection in the human genome from haplotype structure. *Nature* 2002,**  
640 **419(6909):832-837.**
- 641 37. Müller P, Warr E, Stevenson BJ, Pignatelli PM, Morgan JC, Steven A, Yawson AE,  
642 Mitchell SN, Ranson H, Hemingway J *et al*: **Field-caught permethrin-resistant**



- 643 **Anopheles gambiae overexpress CYP6P3, a P450 that metabolises pyrethroids.**  
644 *PLoS Genet* 2008, **4**(11):e1000286.
- 645 38. Stica C, Jeffries CL, Irish SR, Barry Y, Camara D, Yansane I, Kristan M, Walker T,  
646 Messenger LA: **Characterizing the molecular and metabolic mechanisms of**  
647 **insecticide resistance in *Anopheles gambiae* in Faranah, Guinea.** *Malar J* 2019,  
648 **18**(1):244.
- 649 39. **Ag1000G - AR3 Panoptes genome browser**  
650 [[https://www.malariagen.net/apps/ag1000g/phase1-](https://www.malariagen.net/apps/ag1000g/phase1-AR3/index.html?dataset=Ag1000G&workspace=workspace_1&view=f6c6c7c8-23c9-11eb-a4f3-22000a6287ed&state=genomebrowser)  
651 [AR3/index.html?dataset=Ag1000G&workspace=workspace\\_1&view=f6c6c7c8-23c9-](https://www.malariagen.net/apps/ag1000g/phase1-AR3/index.html?dataset=Ag1000G&workspace=workspace_1&view=f6c6c7c8-23c9-11eb-a4f3-22000a6287ed&state=genomebrowser)  
652 [11eb-a4f3-22000a6287ed&state=genomebrowser](https://www.malariagen.net/apps/ag1000g/phase1-AR3/index.html?dataset=Ag1000G&workspace=workspace_1&view=f6c6c7c8-23c9-11eb-a4f3-22000a6287ed&state=genomebrowser)]
- 653 40. Clarkson CS, Miles A, Harding NJ, Weetman D, Kwiatkowski D, Donnelly M, The  
654 *Anopheles gambiae* Genomes C: **The genetic architecture of target-site**  
655 **resistance to pyrethroid insecticides in the African malaria vectors *Anopheles***  
656 ***gambiae* and *Anopheles coluzzii*.** 2018.
- 657 41. Hemingway J: **The role of vector control in stopping the transmission of**  
658 **malaria: threats and opportunities.** *Philos Trans R Soc Lond B Biol Sci* 2014,  
659 **369**(1645):20130431.
- 660 42. Liu N: **Insecticide resistance in mosquitoes: impact, mechanisms, and research**  
661 **directions.** *Annu Rev Entomol* 2015, **60**:537-559.
- 662 43. Ingham VA, Pignatelli P, Moore JD, Wagstaff S, Ranson H: **The transcription factor**  
663 **Maf-S regulates metabolic resistance to insecticides in the malaria vector**  
664 ***Anopheles gambiae*.** *BMC Genomics* 2017, **18**(1):669.
- 665 44. Wilding CS: **Regulating resistance: CncC:Maf, antioxidant response elements**  
666 **and the overexpression of detoxification genes in insecticide resistance.** *Curr*  
667 *Opin Insect Sci* 2018, **27**:89-96.
- 668 45. Coetzee M, Hunt RH, Wilkerson R, Della Torre A, Coulibaly MB, Besansky NJ:  
669 ***Anopheles coluzzii* and *Anopheles amharicus*, new members of the *Anopheles***  
670 ***gambiae* complex.** *Zootaxa* 2013, **3619**:246-274.
- 671 46. Holt RA, Subramanian GM, Halpern A, Sutton GG, Charlab R, Nusskern DR,  
672 Wincker P, Clark AG, Ribeiro JMC, Wides R *et al*: **The genome sequence of the**  
673 **malaria mosquito *Anopheles gambiae*.** *Science* 2002, **298**(5591):129-149.
- 674 47. Cingolani P, Platts A, Wang LL, Coon M, Nguyen T, Wang L, Land SJ, Lu X, Ruden  
675 DM: **A program for annotating and predicting the effects of single nucleotide**  
676 **polymorphisms, SnpEff: SNPs in the genome of *Drosophila melanogaster***  
677 **strain w1118; iso-2; iso-3.** *Fly* 2012, **6**(2):80-92.
- 678 48. Lewontin RC: **The Interaction of Selection and Linkage. I. General**  
679 **Considerations; Heterotic Models.** *Genetics* 1964, **49**(1):49-67.
- 680 49. Hunter JD: **Matplotlib: A 2D Graphics Environment.** *Comput Sci Eng* 2007,  
681 **9**(3):90-95.
- 682 50. Cartopy: **Using cartopy with matplotlib — cartopy 0.18.0 documentation.** In.,  
683 0.17.0 edn. <https://scitools.org.uk/>; 2020.
- 684 51. Wagah MG: **ag1000g-phase2-cyp6m2.** In., 9/11/2020 edn. <https://github.com/>;  
685 2020.
- 686 52. Harrington B: **Inkscape.** In., 1.0.1 edn; 2005.
- 687 53. Miles A: **scikit-allel - Explore and analyse genetic variation — scikit-allel 1.3.2**  
688 **documentation.** In. <https://github.com/>; 2018.
- 689 54. Consortium TAgG: **Ag1000G phase 2 AR1 data release.** In., 1 edn. MalariaGen  
690 Genomic Epidemiology Network; 2017.
- 691

## 692 Additional files

- 693 1. Additional file 1.

- 694 a. File name = Additional file 1
- 695 b. Title = List of *An. gambiae* and *An. coluzzii* genome samples and haplotypes from
- 696 Ag1000G Phase 2-AR3.
- 697 c. Format = csv
- 698 d. Description = Table showing Ag1000G Phase 2-AR3 sample properties such as
- 699 population, country, region, sex, species identity and haplotype cluster.
- 700 2. Additional file 2.
- 701 a. File name = Additional file 2
- 702 b. Title = List of synonymous and non-synonymous genetic variants in *Cyp6m2*.
- 703 c. Format = csv
- 704 d. Description = Table showing Ag1000G Phase 2-AR3 *Cyp6m2* variant calls and
- 705 variant properties stratified by population and effect.
- 706
- 707



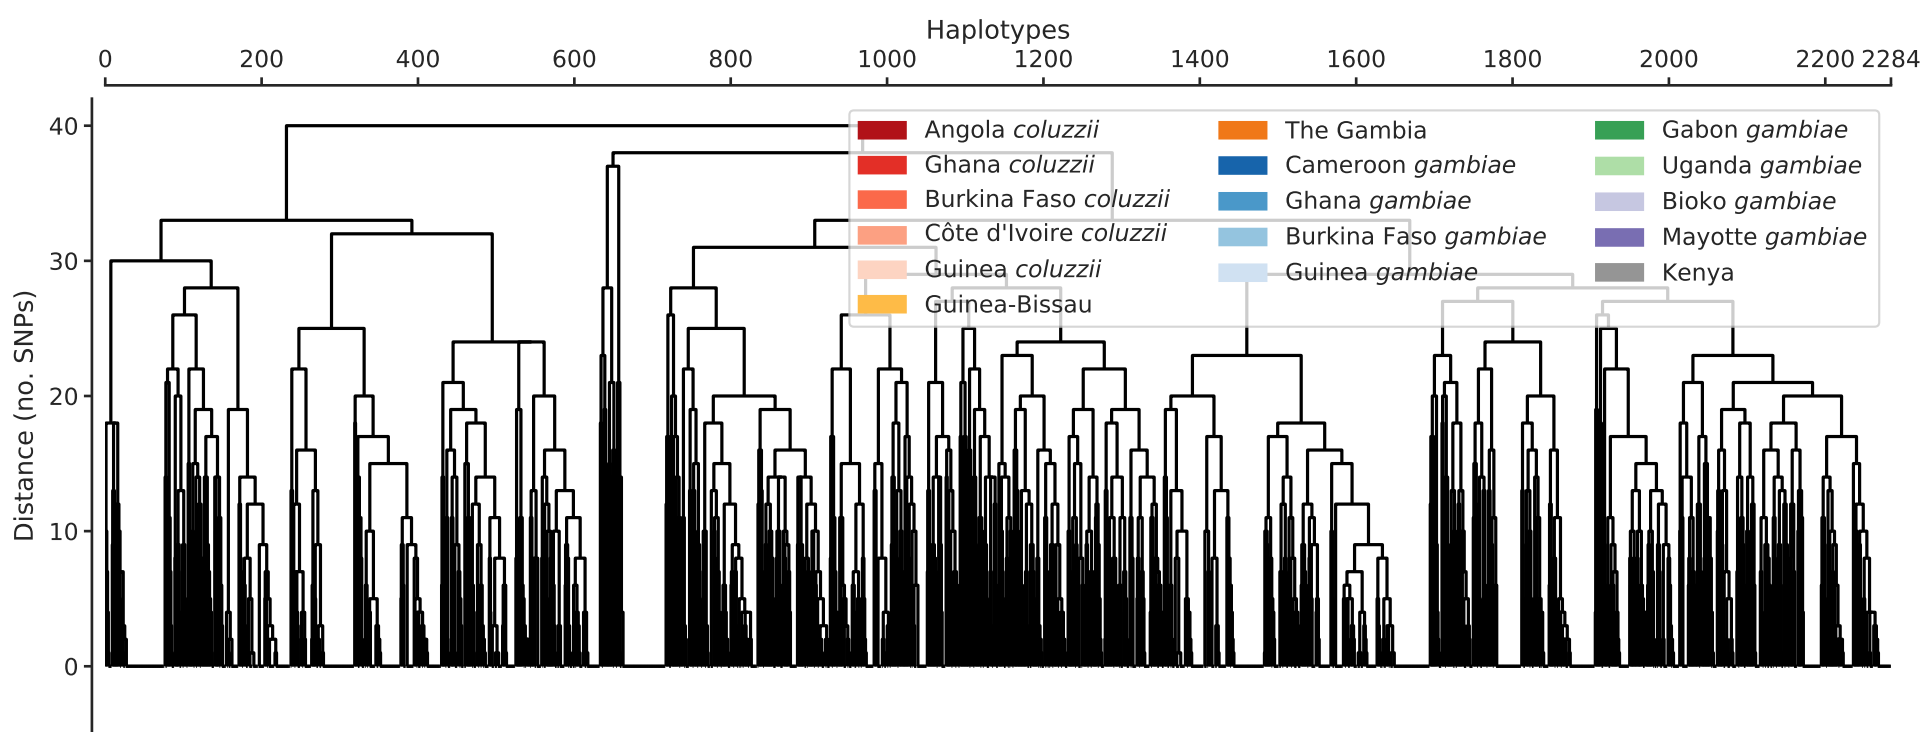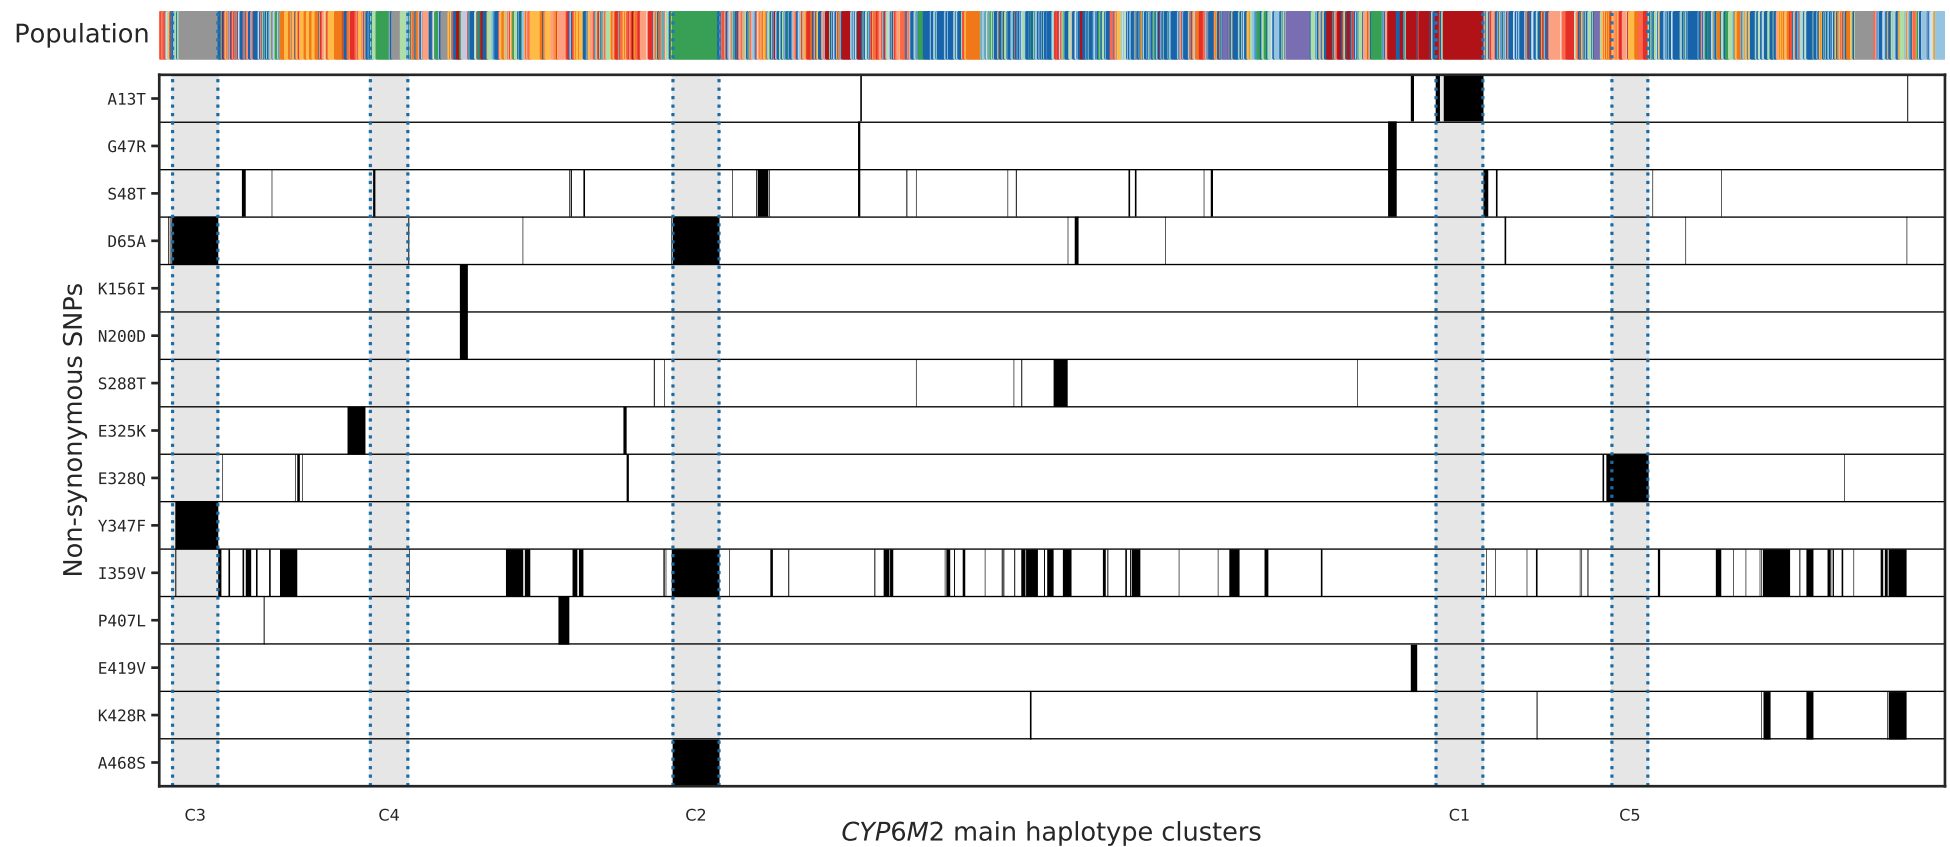

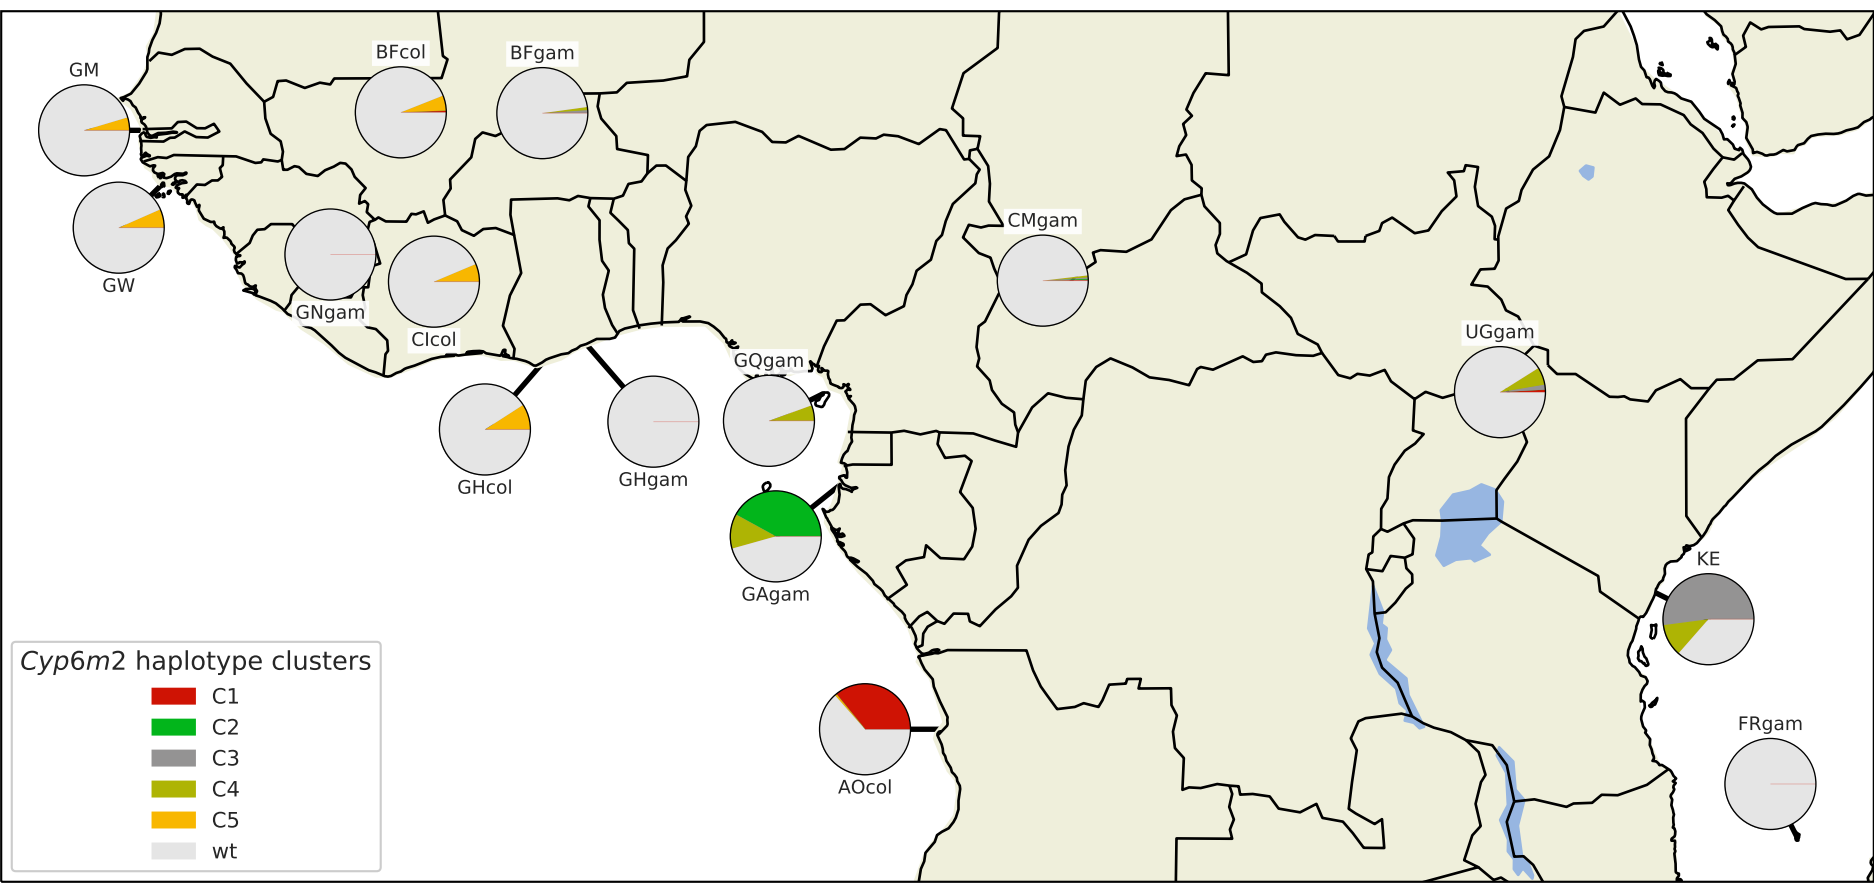

- AO coluzzii
- GH coluzzii
- BF coluzzii
- CI coluzzii
- GN coluzzii
- CM gambiae
- GH gambiae
- BF gambiae
- GN gambiae
- GW
- GM
- GA gambiae
- UG gambiae
- FR gambiae
- GQ gambiae
- KE

- 1
- 10
- 50
- 100

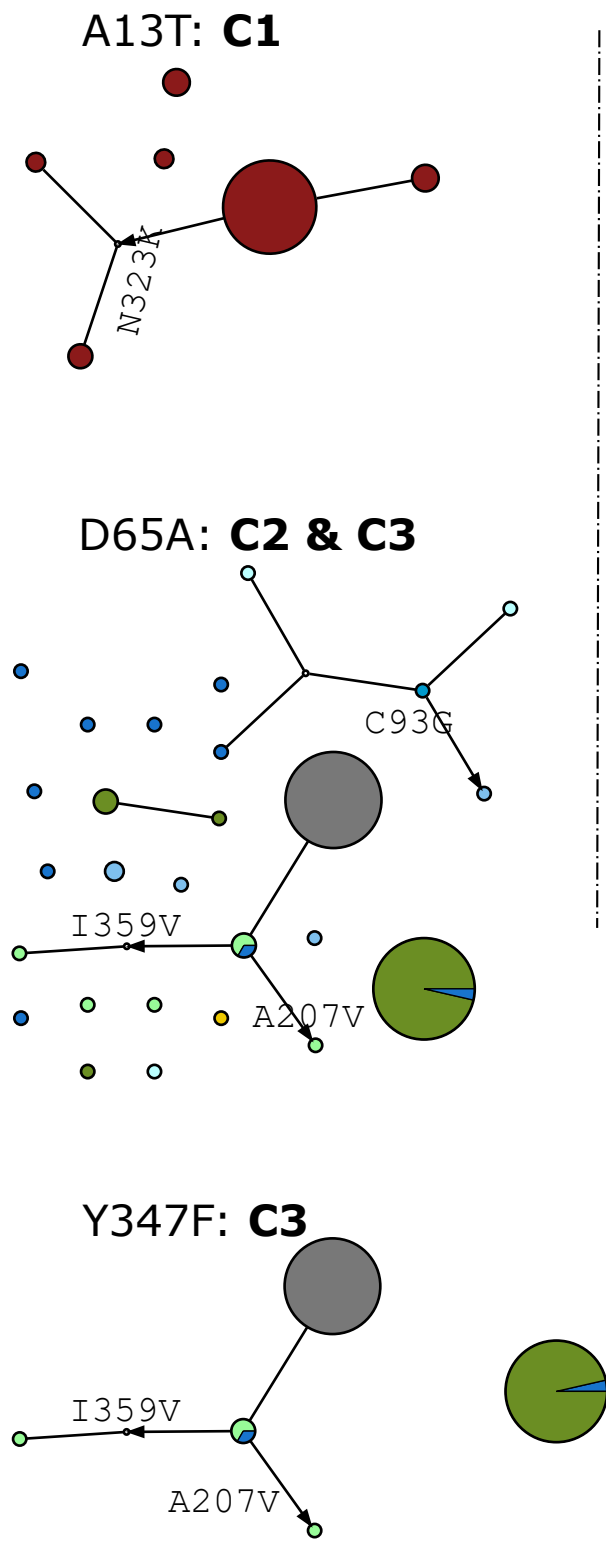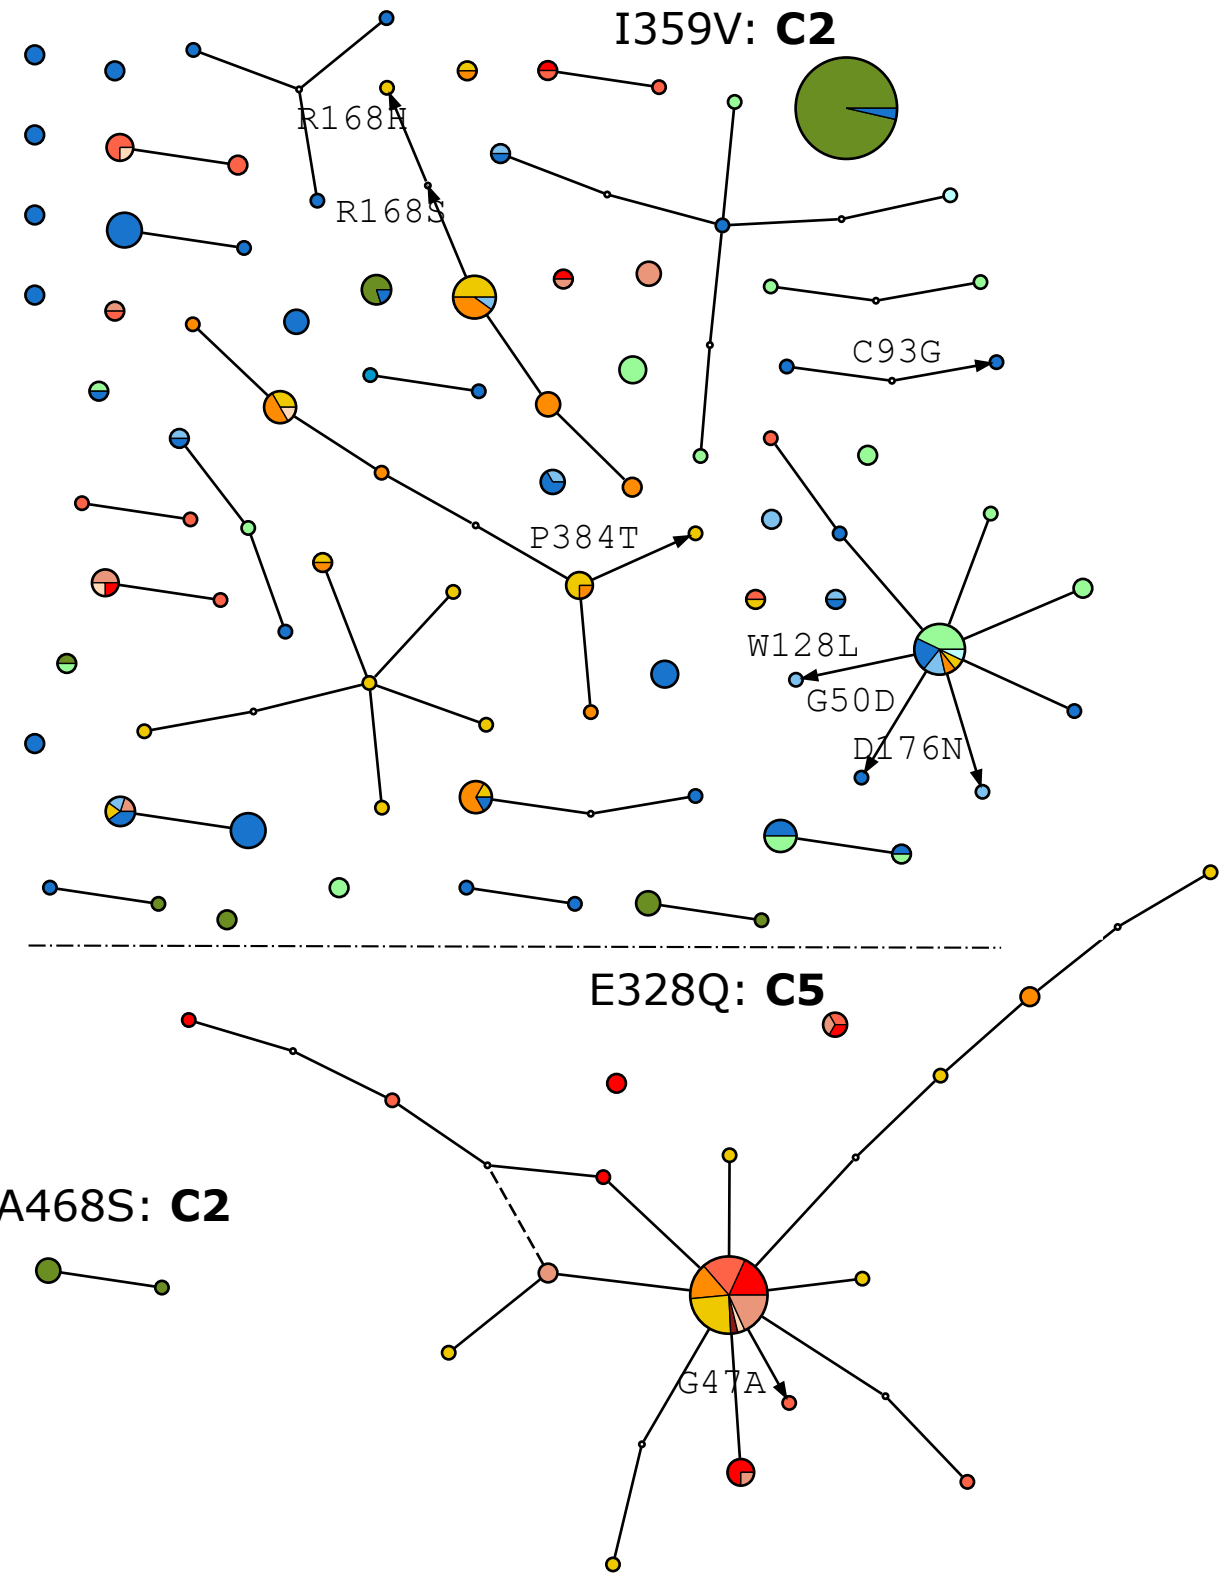

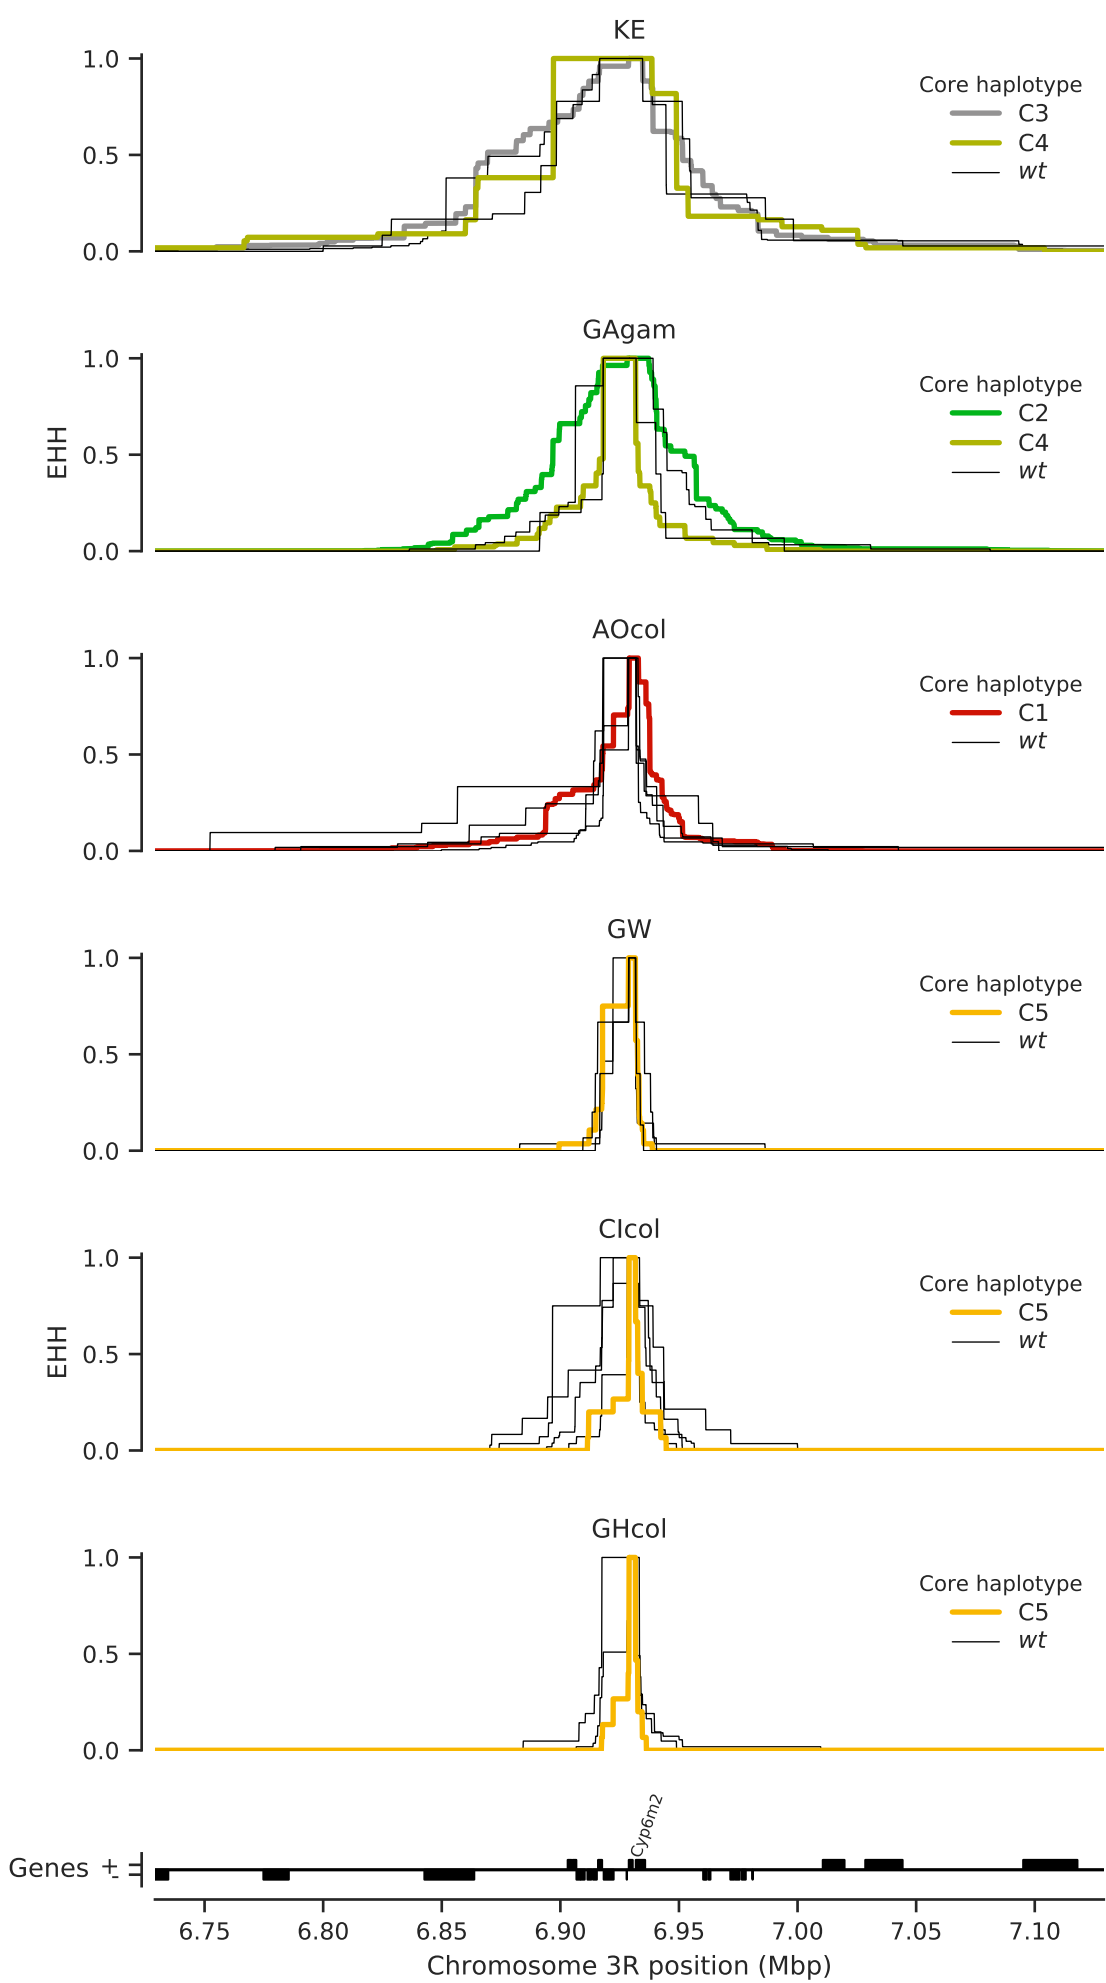

Source: http://biorxiv.org/content/10.1101/2020.11.12.378943v1.full.pdf
