# Supplementary material for: Genetic variation at the Cyp6m2 putative insecticide resistance locus in Anopheles gambiae and Anopheles coluzzii
Source: bioRxiv preprint, doi:10.1101/2020.11.12.378943, version 1 (2020-11-13)
Supplement: Additional file 1 [file 378943_file13.csv]

label	ox_code	population	label_aug	country	region	sex	m_s	Clusters
AA0040-Ca	AA0040-C	GHcol	AA0040-Ca [Ghana, Twifo_Praso, M F]	Ghana	Twifo_Praso	F	M	wt
AA0040-Cb	AA0040-C	GHcol	AA0040-Cb [Ghana, Twifo_Praso, M F]	Ghana	Twifo_Praso	F	M	wt
AA0041-Ca	AA0041-C	GHcol	AA0041-Ca [Ghana, Twifo_Praso, M F]	Ghana	Twifo_Praso	F	M	wt
AA0041-Cb	AA0041-C	GHcol	AA0041-Cb [Ghana, Twifo_Praso, M F]	Ghana	Twifo_Praso	F	M	wt
AA0042-Ca	AA0042-C	GHcol	AA0042-Ca [Ghana, Takoradi, M F]	Ghana	Takoradi	F	M	wt
AA0042-Cb	AA0042-C	GHcol	AA0042-Cb [Ghana, Takoradi, M F]	Ghana	Takoradi	F	M	wt
AA0043-Ca	AA0043-C	GHcol	AA0043-Ca [Ghana, Takoradi, M F]	Ghana	Takoradi	F	M	wt
AA0043-Cb	AA0043-C	GHcol	AA0043-Cb [Ghana, Takoradi, M F]	Ghana	Takoradi	F	M	wt
AA0044-Ca	AA0044-C	GHcol	AA0044-Ca [Ghana, Takoradi, M F]	Ghana	Takoradi	F	M	wt
AA0044-Cb	AA0044-C	GHcol	AA0044-Cb [Ghana, Takoradi, M F]	Ghana	Takoradi	F	M	wt
AA0048-Ca	AA0048-C	GHgam	AA0048-Ca [Ghana, Madina, S F]	Ghana	Madina	F	S	wt
AA0048-Cb	AA0048-C	GHgam	AA0048-Cb [Ghana, Madina, S F]	Ghana	Madina	F	S	wt
AA0049-Ca	AA0049-C	GHcol	AA0049-Ca [Ghana, Madina, M F]	Ghana	Madina	F	M	wt
AA0049-Cb	AA0049-C	GHcol	AA0049-Cb [Ghana, Madina, M F]	Ghana	Madina	F	M	wt
AA0050-Ca	AA0050-C	GHgam	AA0050-Ca [Ghana, Madina, S F]	Ghana	Madina	F	S	wt
AA0050-Cb	AA0050-C	GHgam	AA0050-Cb [Ghana, Madina, S F]	Ghana	Madina	F	S	wt
AA0051-Ca	AA0051-C	GHcol	AA0051-Ca [Ghana, Twifo_Praso, M F]	Ghana	Twifo_Praso	F	M	wt
AA0051-Cb	AA0051-C	GHcol	AA0051-Cb [Ghana, Twifo_Praso, M F]	Ghana	Twifo_Praso	F	M	wt
AA0052-Ca	AA0052-C	GHcol	AA0052-Ca [Ghana, Twifo_Praso, M F]	Ghana	Twifo_Praso	F	M	wt
AA0052-Cb	AA0052-C	GHcol	AA0052-Cb [Ghana, Twifo_Praso, M F]	Ghana	Twifo_Praso	F	M	wt
AA0053-Ca	AA0053-C	GHcol	AA0053-Ca [Ghana, Twifo_Praso, M F]	Ghana	Twifo_Praso	F	M	wt
AA0053-Cb	AA0053-C	GHcol	AA0053-Cb [Ghana, Twifo_Praso, M F]	Ghana	Twifo_Praso	F	M	wt
AA0054-Ca	AA0054-C	GHcol	AA0054-Ca [Ghana, Takoradi, M F]	Ghana	Takoradi	F	M	wt
AA0054-Cb	AA0054-C	GHcol	AA0054-Cb [Ghana, Takoradi, M F]	Ghana	Takoradi	F	M	wt
AA0055-Ca	AA0055-C	GHcol	AA0055-Ca [Ghana, Takoradi, M F]	Ghana	Takoradi	F	M	wt
AA0055-Cb	AA0055-C	GHcol	AA0055-Cb [Ghana, Takoradi, M F]	Ghana	Takoradi	F	M	wt
AA0056-Ca	AA0056-C	GHcol	AA0056-Ca [Ghana, Takoradi, M F]	Ghana	Takoradi	F	M	wt
AA0056-Cb	AA0056-C	GHcol	AA0056-Cb [Ghana, Takoradi, M F]	Ghana	Takoradi	F	M	wt
AA0060-Ca	AA0060-C	GHgam	AA0060-Ca [Ghana, Madina, S F]	Ghana	Madina	F	S	wt
AA0060-Cb	AA0060-C	GHgam	AA0060-Cb [Ghana, Madina, S F]	Ghana	Madina	F	S	wt
AA0061-Ca	AA0061-C	GHgam	AA0061-Ca [Ghana, Madina, S F]	Ghana	Madina	F	S	wt
AA0061-Cb	AA0061-C	GHgam	AA0061-Cb [Ghana, Madina, S F]	Ghana	Madina	F	S	wt
AA0063-Ca	AA0063-C	GHcol	AA0063-Ca [Ghana, Twifo_Praso, M F]	Ghana	Twifo_Praso	F	M	wt
AA0063-Cb	AA0063-C	GHcol	AA0063-Cb [Ghana, Twifo_Praso, M F]	Ghana	Twifo_Praso	F	M	wt
AA0064-Ca	AA0064-C	GHcol	AA0064-Ca [Ghana, Twifo_Praso, M F]	Ghana	Twifo_Praso	F	M	C5
AA0064-Cb	AA0064-C	GHcol	AA0064-Cb [Ghana, Twifo_Praso, M F]	Ghana	Twifo_Praso	F	M	wt
AA0066-Ca	AA0066-C	GHcol	AA0066-Ca [Ghana, Takoradi, M F]	Ghana	Takoradi	F	M	wt
AA0066-Cb	AA0066-C	GHcol	AA0066-Cb [Ghana, Takoradi, M F]	Ghana	Takoradi	F	M	wt
AA0067-Ca	AA0067-C	GHcol	AA0067-Ca [Ghana, Takoradi, M F]	Ghana	Takoradi	F	M	wt
AA0067-Cb	AA0067-C	GHcol	AA0067-Cb [Ghana, Takoradi, M F]	Ghana	Takoradi	F	M	wt
AA0068-Ca	AA0068-C	GHcol	AA0068-Ca [Ghana, Takoradi, M F]	Ghana	Takoradi	F	M	wt
AA0068-Cb	AA0068-C	GHcol	AA0068-Cb [Ghana, Takoradi, M F]	Ghana	Takoradi	F	M	wt
AA0072-Ca	AA0072-C	GHgam	AA0072-Ca [Ghana, Madina, S F]	Ghana	Madina	F	S	wt
AA0072-Cb	AA0072-C	GHgam	AA0072-Cb [Ghana, Madina, S F]	Ghana	Madina	F	S	wt
AA0073-Ca	AA0073-C	GHcol	AA0073-Ca [Ghana, Madina, M F]	Ghana	Madina	F	M	wt
AA0073-Cb	AA0073-C	GHcol	AA0073-Cb [Ghana, Madina, M F]	Ghana	Madina	F	M	wt
AA0074-Ca	AA0074-C	GHcol	AA0074-Ca [Ghana, Madina, M F]	Ghana	Madina	F	M	wt
AA0074-Cb	AA0074-C	GHcol	AA0074-Cb [Ghana, Madina, M F]	Ghana	Madina	F	M	wt
AA0075-Ca	AA0075-C	GHcol	AA0075-Ca [Ghana, Twifo_Praso, M F]	Ghana	Twifo_Praso	F	M	wt
AA0075-Cb	AA0075-C	GHcol	AA0075-Cb [Ghana, Twifo_Praso, M F]	Ghana	Twifo_Praso	F	M	wt
AA0076-Ca	AA0076-C	GHcol	AA0076-Ca [Ghana, Twifo_Praso, M F]	Ghana	Twifo_Praso	F	M	wt
AA0076-Cb	AA0076-C	GHcol	AA0076-Cb [Ghana, Twifo_Praso, M F]	Ghana	Twifo_Praso	F	M	wt
AA0077-Ca	AA0077-C	GHcol	AA0077-Ca [Ghana, Twifo_Praso, M F]	Ghana	Twifo_Praso	F	M	wt
AA0077-Cb	AA0077-C	GHcol	AA0077-Cb [Ghana, Twifo_Praso, M F]	Ghana	Twifo_Praso	F	M	wt
AA0080-Ca	AA0080-C	GHcol	AA0080-Ca [Ghana, Takoradi, M F]	Ghana	Takoradi	F	M	wt
AA0080-Cb	AA0080-C	GHcol	AA0080-Cb [Ghana, Takoradi, M F]	Ghana	Takoradi	F	M	wt
AA0084-Ca	AA0084-C	GHgam	AA0084-Ca [Ghana, Madina, S F]	Ghana	Madina	F	S	wt
AA0084-Cb	AA0084-C	GHgam	AA0084-Cb [Ghana, Madina, S F]	Ghana	Madina	F	S	wt
AA0085-Ca	AA0085-C	GHgam	AA0085-Ca [Ghana, Madina, S F]	Ghana	Madina	F	S	wt
AA0085-Cb	AA0085-C	GHgam	AA0085-Cb [Ghana, Madina, S F]	Ghana	Madina	F	S	wt
AA0086-Ca	AA0086-C	GHgam	AA0086-Ca [Ghana, Madina, S F]	Ghana	Madina	F	S	wt
AA0086-Cb	AA0086-C	GHgam	AA0086-Cb [Ghana, Madina, S F]	Ghana	Madina	F	S	wt
AA0087-Ca	AA0087-C	GHcol	AA0087-Ca [Ghana, Twifo_Praso, M F]	Ghana	Twifo_Praso	F	M	C5
AA0087-Cb	AA0087-C	GHcol	AA0087-Cb [Ghana, Twifo_Praso, M F]	Ghana	Twifo_Praso	F	M	wt
AA0088-Ca	AA0088-C	GHcol	AA0088-Ca [Ghana, Twifo_Praso, M F]	Ghana	Twifo_Praso	F	M	wt
AA0088-Cb	AA0088-C	GHcol	AA0088-Cb [Ghana, Twifo_Praso, M F]	Ghana	Twifo_Praso	F	M	wt
AA0089-Ca	AA0089-C	GHcol	AA0089-Ca [Ghana, Twifo_Praso, M F]	Ghana	Twifo_Praso	F	M	wt
AA0089-Cb	AA0089-C	GHcol	AA0089-Cb [Ghana, Twifo_Praso, M F]	Ghana	Twifo_Praso	F	M	wt
AA0090-Ca	AA0090-C	GHcol	AA0090-Ca [Ghana, Takoradi, M F]	Ghana	Takoradi	F	M	wt
AA0090-Cb	AA0090-C	GHcol	AA0090-Cb [Ghana, Takoradi, M F]	Ghana	Takoradi	F	M	wt
AA0091-Ca	AA0091-C	GHcol	AA0091-Ca [Ghana, Takoradi, M F]	Ghana	Takoradi	F	M	wt
AA0091-Cb	AA0091-C	GHcol	AA0091-Cb [Ghana, Takoradi, M F]	Ghana	Takoradi	F	M	wt
AA0096-Ca	AA0096-C	GHgam	AA0096-Ca [Ghana, Madina, S F]	Ghana	Madina	F	S	wt
AA0096-Cb	AA0096-C	GHgam	AA0096-Cb [Ghana, Madina, S F]	Ghana	Madina	F	S	wt
AA0097-Ca	AA0097-C	GHcol	AA0097-Ca [Ghana, Madina, M F]	Ghana	Madina	F	M	wt
AA0097-Cb	AA0097-C	GHcol	AA0097-Cb [Ghana, Madina, M F]	Ghana	Madina	F	M	wt
AA0098-Ca	AA0098-C	GHcol	AA0098-Ca [Ghana, Madina, M F]	Ghana	Madina	F	M	wt
AA0098-Cb	AA0098-C	GHcol	AA0098-Cb [Ghana, Madina, M F]	Ghana	Madina	F	M	wt
AA0099-Ca	AA0099-C	GHcol	AA0099-Ca [Ghana, Twifo_Praso, M F]	Ghana	Twifo_Praso	F	M	wt
AA0099-Cb	AA0099-C	GHcol	AA0099-Cb [Ghana, Twifo_Praso, M F]	Ghana	Twifo_Praso	F	M	wt
AA0100-Ca	AA0100-C	GHcol	AA0100-Ca [Ghana, Twifo_Praso, M F]	Ghana	Twifo_Praso	F	M	wt
AA0100-Cb	AA0100-C	GHcol	AA0100-Cb [Ghana, Twifo_Praso, M F]	Ghana	Twifo_Praso	F	M	wt
AA0101-Ca	AA0101-C	GHcol	AA0101-Ca [Ghana, Twifo_Praso, M F]	Ghana	Twifo_Praso	F	M	C5
AA0101-Cb	AA0101-C	GHcol	AA0101-Cb [Ghana, Twifo_Praso, M F]	Ghana	Twifo_Praso	F	M	C5
AA0102-Ca	AA0102-C	GHcol	AA0102-Ca [Ghana, Takoradi, M F]	Ghana	Takoradi	F	M	wt
AA0102-Cb	AA0102-C	GHcol	AA0102-Cb [Ghana, Takoradi, M F]	Ghana	Takoradi	F	M	wt
AA0103-Ca	AA0103-C	GHcol	AA0103-Ca [Ghana, Takoradi, M F]	Ghana	Takoradi	F	M	wt
AA0103-Cb	AA0103-C	GHcol	AA0103-Cb [Ghana, Takoradi, M F]	Ghana	Takoradi	F	M	wt
AA0104-Ca	AA0104-C	GHcol	AA0104-Ca [Ghana, Takoradi, M F]	Ghana	Takoradi	F	M	wt
AA0104-Cb	AA0104-C	GHcol	AA0104-Cb [Ghana, Takoradi, M F]	Ghana	Takoradi	F	M	wt
AA0107-Ca	AA0107-C	GHcol	AA0107-Ca [Ghana, Koforidua, M F]	Ghana	Koforidua	F	M	wt
AA0107-Cb	AA0107-C	GHcol	AA0107-Cb [Ghana, Koforidua, M F]	Ghana	Koforidua	F	M	wt
AA0108-Ca	AA0108-C	GHgam	AA0108-Ca [Ghana, Madina, S F]	Ghana	Madina	F	S	wt
AA0108-Cb	AA0108-C	GHgam	AA0108-Cb [Ghana, Madina, S F]	Ghana	Madina	F	S	wt
AA0109-Ca	AA0109-C	GHcol	AA0109-Ca [Ghana, Madina, M F]	Ghana	Madina	F	M	wt
AA0109-Cb	AA0109-C	GHcol	AA0109-Cb [Ghana, Madina, M F]	Ghana	Madina	F	M	wt
AA0110-Ca	AA0110-C	GHcol	AA0110-Ca [Ghana, Madina, M F]	Ghana	Madina	F	M	wt
AA0110-Cb	AA0110-C	GHcol	AA0110-Cb [Ghana, Madina, M F]	Ghana	Madina	F	M	wt
AA0111-Ca	AA0111-C	GHcol	AA0111-Ca [Ghana, Twifo_Praso, M F]	Ghana	Twifo_Praso	F	M	wt
AA0111-Cb	AA0111-C	GHcol	AA0111-Cb [Ghana, Twifo_Praso, M F]	Ghana	Twifo_Praso	F	M	C5
AA0113-Ca	AA0113-C	GHcol	AA0113-Ca [Ghana, Twifo_Praso, M F]	Ghana	Twifo_Praso	F	M	wt
AA0113-Cb	AA0113-C	GHcol	AA0113-Cb [Ghana, Twifo_Praso, M F]	Ghana	Twifo_Praso	F	M	C5
AA0114-Ca	AA0114-C	GHcol	AA0114-Ca [Ghana, Takoradi, M F]	Ghana	Takoradi	F	M	wt
AA0114-Cb	AA0114-C	GHcol	AA0114-Cb [Ghana, Takoradi, M F]	Ghana	Takoradi	F	M	wt
AA0115-Ca	AA0115-C	GHcol	AA0115-Ca [Ghana, Takoradi, M F]	Ghana	Takoradi	F	M	C5
AA0115-Cb	AA0115-C	GHcol	AA0115-Cb [Ghana, Takoradi, M F]	Ghana	Takoradi	F	M	wt
AA0116-Ca	AA0116-C	GHcol	AA0116-Ca [Ghana, Takoradi, M F]	Ghana	Takoradi	F	M	wt
AA0116-Cb	AA0116-C	GHcol	AA0116-Cb [Ghana, Takoradi, M F]	Ghana	Takoradi	F	M	wt
AA0122-Ca	AA0122-C	GHgam	AA0122-Ca [Ghana, Madina, S F]	Ghana	Madina	F	S	wt
AA0122-Cb	AA0122-C	GHgam	AA0122-Cb [Ghana, Madina, S F]	Ghana	Madina	F	S	wt
AA0123-Ca	AA0123-C	GHcol	AA0123-Ca [Ghana, Twifo_Praso, M F]	Ghana	Twifo_Praso	F	M	wt
AA0123-Cb	AA0123-C	GHcol	AA0123-Cb [Ghana, Twifo_Praso, M F]	Ghana	Twifo_Praso	F	M	wt
AA0124-Ca	AA0124-C	GHcol	AA0124-Ca [Ghana, Twifo_Praso, M F]	Ghana	Twifo_Praso	F	M	wt
AA0124-Cb	AA0124-C	GHcol	AA0124-Cb [Ghana, Twifo_Praso, M F]	Ghana	Twifo_Praso	F	M	wt
AA0125-Ca	AA0125-C	GHcol	AA0125-Ca [Ghana, Twifo_Praso, M F]	Ghana	Twifo_Praso	F	M	wt
AA0125-Cb	AA0125-C	GHcol	AA0125-Cb [Ghana, Twifo_Praso, M F]	Ghana	Twifo_Praso	F	M	wt
AA0127-Ca	AA0127-C	GHcol	AA0127-Ca [Ghana, Takoradi, M F]	Ghana	Takoradi	F	M	wt
AA0127-Cb	AA0127-C	GHcol	AA0127-Cb [Ghana, Takoradi, M F]	Ghana	Takoradi	F	M	wt
AA0132-Ca	AA0132-C	GHcol	AA0132-Ca [Ghana, Madina, M F]	Ghana	Madina	F	M	wt
AA0132-Cb	AA0132-C	GHcol	AA0132-Cb [Ghana, Madina, M F]	Ghana	Madina	F	M	wt
AA0133-Ca	AA0133-C	GHgam	AA0133-Ca [Ghana, Madina, S F]	Ghana	Madina	F	S	wt
AA0133-Cb	AA0133-C	GHgam	AA0133-Cb [Ghana, Madina, S F]	Ghana	Madina	F	S	wt
AA0134-Ca	AA0134-C	GHcol	AA0134-Ca [Ghana, Madina, M F]	Ghana	Madina	F	M	wt
AA0134-Cb	AA0134-C	GHcol	AA0134-Cb [Ghana, Madina, M F]	Ghana	Madina	F	M	wt
AA0135-Ca	AA0135-C	GHcol	AA0135-Ca [Ghana, Twifo_Praso, M F]	Ghana	Twifo_Praso	F	M	C5
AA0135-Cb	AA0135-C	GHcol	AA0135-Cb [Ghana, Twifo_Praso, M F]	Ghana	Twifo_Praso	F	M	wt
AA0136-Ca	AA0136-C	GHcol	AA0136-Ca [Ghana, Takoradi, M F]	Ghana	Takoradi	F	M	C5
AA0136-Cb	AA0136-C	GHcol	AA0136-Cb [Ghana, Takoradi, M F]	Ghana	Takoradi	F	M	C5
AA0139-Ca	AA0139-C	GHcol	AA0139-Ca [Ghana, Madina, M F]	Ghana	Madina	F	M	wt
AA0139-Cb	AA0139-C	GHcol	AA0139-Cb [Ghana, Madina, M F]	Ghana	Madina	F	M	wt
AA0140-Ca	AA0140-C	GHcol	AA0140-Ca [Ghana, Madina, M F]	Ghana	Madina	F	M	wt
AA0140-Cb	AA0140-C	GHcol	AA0140-Cb [Ghana, Madina, M F]	Ghana	Madina	F	M	wt
AA0141-Ca	AA0141-C	GHcol	AA0141-Ca [Ghana, Madina, M F]	Ghana	Madina	F	M	wt
AA0141-Cb	AA0141-C	GHcol	AA0141-Cb [Ghana, Madina, M F]	Ghana	Madina	F	M	wt
AB0085-Ca	AB0085-C	BFgam	AB0085-Ca [Burkina Faso, Pala, S F]	Burkina Faso	Pala	F	S	wt
AB0085-Cb	AB0085-C	BFgam	AB0085-Cb [Burkina Faso, Pala, S F]	Burkina Faso	Pala	F	S	wt
AB0087-Ca	AB0087-C	BFcol	AB0087-Ca [Burkina Faso, Bana M, M F]	Burkina Faso	Bana M	F	M	wt
AB0087-Cb	AB0087-C	BFcol	AB0087-Cb [Burkina Faso, Bana M, M F]	Burkina Faso	Bana M	F	M	wt
AB0088-Ca	AB0088-C	BFcol	AB0088-Ca [Burkina Faso, Bana M, M F]	Burkina Faso	Bana M	F	M	wt
AB0088-Cb	AB0088-C	BFcol	AB0088-Cb [Burkina Faso, Bana M, M F]	Burkina Faso	Bana M	F	M	wt
AB0089-Ca	AB0089-C	BFcol	AB0089-Ca [Burkina Faso, Bana M, M F]	Burkina Faso	Bana M	F	M	wt
AB0089-Cb	AB0089-C	BFcol	AB0089-Cb [Burkina Faso, Bana M, M F]	Burkina Faso	Bana M	F	M	wt
AB0090-Ca	AB0090-C	BFcol	AB0090-Ca [Burkina Faso, Bana, M F]	Burkina Faso	Bana	F	M	wt
AB0090-Cb	AB0090-C	BFcol	AB0090-Cb [Burkina Faso, Bana, M F]	Burkina Faso	Bana	F	M	wt
AB0091-Ca	AB0091-C	BFcol	AB0091-Ca [Burkina Faso, Bana, M F]	Burkina Faso	Bana	F	M	wt
AB0091-Cb	AB0091-C	BFcol	AB0091-Cb [Burkina Faso, Bana, M F]	Burkina Faso	Bana	F	M	wt
AB0092-Ca	AB0092-C	BFcol	AB0092-Ca [Burkina Faso, Bana M, M F]	Burkina Faso	Bana M	F	M	wt
AB0092-Cb	AB0092-C	BFcol	AB0092-Cb [Burkina Faso, Bana M, M F]	Burkina Faso	Bana M	F	M	wt
AB0094-Ca	AB0094-C	BFcol	AB0094-Ca [Burkina Faso, Bana M, M F]	Burkina Faso	Bana M	F	M	wt
AB0094-Cb	AB0094-C	BFcol	AB0094-Cb [Burkina Faso, Bana M, M F]	Burkina Faso	Bana M	F	M	wt
AB0095-Ca	AB0095-C	BFcol	AB0095-Ca [Burkina Faso, Bana M, M F]	Burkina Faso	Bana M	F	M	wt
AB0095-Cb	AB0095-C	BFcol	AB0095-Cb [Burkina Faso, Bana M, M F]	Burkina Faso	Bana M	F	M	wt
AB0097-Ca	AB0097-C	BFcol	AB0097-Ca [Burkina Faso, Bana M, M F]	Burkina Faso	Bana M	F	M	wt
AB0097-Cb	AB0097-C	BFcol	AB0097-Cb [Burkina Faso, Bana M, M F]	Burkina Faso	Bana M	F	M	wt
AB0098-Ca	AB0098-C	BFcol	AB0098-Ca [Burkina Faso, Bana V, M F]	Burkina Faso	Bana V	F	M	wt
AB0098-Cb	AB0098-C	BFcol	AB0098-Cb [Burkina Faso, Bana V, M F]	Burkina Faso	Bana V	F	M	wt
AB0099-Ca	AB0099-C	BFcol	AB0099-Ca [Burkina Faso, Bana V, M F]	Burkina Faso	Bana V	F	M	wt
AB0099-Cb	AB0099-C	BFcol	AB0099-Cb [Burkina Faso, Bana V, M F]	Burkina Faso	Bana V	F	M	wt
AB0100-Ca	AB0100-C	BFcol	AB0100-Ca [Burkina Faso, Bana V, M F]	Burkina Faso	Bana V	F	M	wt
AB0100-Cb	AB0100-C	BFcol	AB0100-Cb [Burkina Faso, Bana V, M F]	Burkina Faso	Bana V	F	M	wt
AB0101-Ca	AB0101-C	BFcol	AB0101-Ca [Burkina Faso, Bana V, M F]	Burkina Faso	Bana V	F	M	wt
AB0101-Cb	AB0101-C	BFcol	AB0101-Cb [Burkina Faso, Bana V, M F]	Burkina Faso	Bana V	F	M	wt
AB0103-Ca	AB0103-C	BFgam	AB0103-Ca [Burkina Faso, Bana M, S F]	Burkina Faso	Bana M	F	S	wt
AB0103-Cb	AB0103-C	BFgam	AB0103-Cb [Burkina Faso, Bana M, S F]	Burkina Faso	Bana M	F	S	wt
AB0104-Ca	AB0104-C	BFgam	AB0104-Ca [Burkina Faso, Bana M, S F]	Burkina Faso	Bana M	F	S	wt
AB0104-Cb	AB0104-C	BFgam	AB0104-Cb [Burkina Faso, Bana M, S F]	Burkina Faso	Bana M	F	S	wt
AB0108-Ca	AB0108-C	BFgam	AB0108-Ca [Burkina Faso, Pala, S F]	Burkina Faso	Pala	F	S	wt
AB0108-Cb	AB0108-C	BFgam	AB0108-Cb [Burkina Faso, Pala, S F]	Burkina Faso	Pala	F	S	wt
AB0109-Ca	AB0109-C	BFcol	AB0109-Ca [Burkina Faso, Bana V, M F]	Burkina Faso	Bana V	F	M	wt
AB0109-Cb	AB0109-C	BFcol	AB0109-Cb [Burkina Faso, Bana V, M F]	Burkina Faso	Bana V	F	M	C5
AB0110-Ca	AB0110-C	BFcol	AB0110-Ca [Burkina Faso, Bana V, M F]	Burkina Faso	Bana V	F	M	C5
AB0110-Cb	AB0110-C	BFcol	AB0110-Cb [Burkina Faso, Bana V, M F]	Burkina Faso	Bana V	F	M	wt
AB0111-Ca	AB0111-C	BFcol	AB0111-Ca [Burkina Faso, Bana M, M F]	Burkina Faso	Bana M	F	M	wt
AB0111-Cb	AB0111-C	BFcol	AB0111-Cb [Burkina Faso, Bana M, M F]	Burkina Faso	Bana M	F	M	wt
AB0112-Ca	AB0112-C	BFcol	AB0112-Ca [Burkina Faso, Bana, M F]	Burkina Faso	Bana	F	M	wt
AB0112-Cb	AB0112-C	BFcol	AB0112-Cb [Burkina Faso, Bana, M F]	Burkina Faso	Bana	F	M	wt
AB0113-Ca	AB0113-C	BFcol	AB0113-Ca [Burkina Faso, Bana V, M F]	Burkina Faso	Bana V	F	M	wt
AB0113-Cb	AB0113-C	BFcol	AB0113-Cb [Burkina Faso, Bana V, M F]	Burkina Faso	Bana V	F	M	wt
AB0114-Ca	AB0114-C	BFcol	AB0114-Ca [Burkina Faso, Bana V, M F]	Burkina Faso	Bana V	F	M	wt
AB0114-Cb	AB0114-C	BFcol	AB0114-Cb [Burkina Faso, Bana V, M F]	Burkina Faso	Bana V	F	M	wt
AB0115-Ca	AB0115-C	BFcol	AB0115-Ca [Burkina Faso, Bana V, M F]	Burkina Faso	Bana V	F	M	wt
AB0115-Cb	AB0115-C	BFcol	AB0115-Cb [Burkina Faso, Bana V, M F]	Burkina Faso	Bana V	F	M	wt
AB0117-Ca	AB0117-C	BFgam	AB0117-Ca [Burkina Faso, Bana, S M]	Burkina Faso	Bana	M	S	wt
AB0117-Cb	AB0117-C	BFgam	AB0117-Cb [Burkina Faso, Bana, S M]	Burkina Faso	Bana	M	S	wt
AB0118-Ca	AB0118-C	BFgam	AB0118-Ca [Burkina Faso, Bana, S M]	Burkina Faso	Bana	M	S	wt
AB0118-Cb	AB0118-C	BFgam	AB0118-Cb [Burkina Faso, Bana, S M]	Burkina Faso	Bana	M	S	wt
AB0119-Ca	AB0119-C	BFgam	AB0119-Ca [Burkina Faso, Bana, S M]	Burkina Faso	Bana	M	S	wt
AB0119-Cb	AB0119-C	BFgam	AB0119-Cb [Burkina Faso, Bana, S M]	Burkina Faso	Bana	M	S	wt
AB0122-Ca	AB0122-C	BFcol	AB0122-Ca [Burkina Faso, Bana, M M]	Burkina Faso	Bana	M	M	wt
AB0122-Cb	AB0122-C	BFcol	AB0122-Cb [Burkina Faso, Bana, M M]	Burkina Faso	Bana	M	M	wt
AB0123-Ca	AB0123-C	BFcol	AB0123-Ca [Burkina Faso, Bana, M M]	Burkina Faso	Bana	M	M	wt
AB0123-Cb	AB0123-C	BFcol	AB0123-Cb [Burkina Faso, Bana, M M]	Burkina Faso	Bana	M	M	wt
AB0124-Ca	AB0124-C	BFcol	AB0124-Ca [Burkina Faso, Bana, M M]	Burkina Faso	Bana	M	M	wt
AB0124-Cb	AB0124-C	BFcol	AB0124-Cb [Burkina Faso, Bana, M M]	Burkina Faso	Bana	M	M	wt
AB0126-Ca	AB0126-C	BFgam	AB0126-Ca [Burkina Faso, Bana, S M]	Burkina Faso	Bana	M	S	wt
AB0126-Cb	AB0126-C	BFgam	AB0126-Cb [Burkina Faso, Bana, S M]	Burkina Faso	Bana	M	S	wt
AB0127-Ca	AB0127-C	BFgam	AB0127-Ca [Burkina Faso, Bana, S M]	Burkina Faso	Bana	M	S	wt
AB0127-Cb	AB0127-C	BFgam	AB0127-Cb [Burkina Faso, Bana, S M]	Burkina Faso	Bana	M	S	wt
AB0128-Ca	AB0128-C	BFgam	AB0128-Ca [Burkina Faso, Bana, S M]	Burkina Faso	Bana	M	S	wt
AB0128-Cb	AB0128-C	BFgam	AB0128-Cb [Burkina Faso, Bana, S M]	Burkina Faso	Bana	M	S	wt
AB0129-Ca	AB0129-C	BFgam	AB0129-Ca [Burkina Faso, Bana, S M]	Burkina Faso	Bana	M	S	wt
AB0129-Cb	AB0129-C	BFgam	AB0129-Cb [Burkina Faso, Bana, S M]	Burkina Faso	Bana	M	S	wt
AB0130-Ca	AB0130-C	BFgam	AB0130-Ca [Burkina Faso, Bana, S M]	Burkina Faso	Bana	M	S	wt
AB0130-Cb	AB0130-C	BFgam	AB0130-Cb [Burkina Faso, Bana, S M]	Burkina Faso	Bana	M	S	wt
AB0133-Ca	AB0133-C	BFgam	AB0133-Ca [Burkina Faso, Sour, S F]	Burkina Faso	Sour	F	S	wt
AB0133-Cb	AB0133-C	BFgam	AB0133-Cb [Burkina Faso, Sour, S F]	Burkina Faso	Sour	F	S	wt
AB0134-Ca	AB0134-C	BFgam	AB0134-Ca [Burkina Faso, Sour, S F]	Burkina Faso	Sour	F	S	wt
AB0134-Cb	AB0134-C	BFgam	AB0134-Cb [Burkina Faso, Sour, S F]	Burkina Faso	Sour	F	S	wt
AB0135-Ca	AB0135-C	BFgam	AB0135-Ca [Burkina Faso, Sour, S F]	Burkina Faso	Sour	F	S	wt
AB0135-Cb	AB0135-C	BFgam	AB0135-Cb [Burkina Faso, Sour, S F]	Burkina Faso	Sour	F	S	wt
AB0136-Ca	AB0136-C	BFgam	AB0136-Ca [Burkina Faso, Sour, S F]	Burkina Faso	Sour	F	S	wt
AB0136-Cb	AB0136-C	BFgam	AB0136-Cb [Burkina Faso, Sour, S F]	Burkina Faso	Sour	F	S	wt
AB0137-Ca	AB0137-C	BFcol	AB0137-Ca [Burkina Faso, Sour, M F]	Burkina Faso	Sour	F	M	wt
AB0137-Cb	AB0137-C	BFcol	AB0137-Cb [Burkina Faso, Sour, M F]	Burkina Faso	Sour	F	M	wt
AB0138-Ca	AB0138-C	BFcol	AB0138-Ca [Burkina Faso, Sour, M F]	Burkina Faso	Sour	F	M	wt
AB0138-Cb	AB0138-C	BFcol	AB0138-Cb [Burkina Faso, Sour, M F]	Burkina Faso	Sour	F	M	wt
AB0139-Ca	AB0139-C	BFcol	AB0139-Ca [Burkina Faso, Sour, M F]	Burkina Faso	Sour	F	M	C5
AB0139-Cb	AB0139-C	BFcol	AB0139-Cb [Burkina Faso, Sour, M F]	Burkina Faso	Sour	F	M	wt
AB0140-Ca	AB0140-C	BFcol	AB0140-Ca [Burkina Faso, Sour, M F]	Burkina Faso	Sour	F	M	wt
AB0140-Cb	AB0140-C	BFcol	AB0140-Cb [Burkina Faso, Sour, M F]	Burkina Faso	Sour	F	M	wt
AB0142-Ca	AB0142-C	BFcol	AB0142-Ca [Burkina Faso, Sour, M F]	Burkina Faso	Sour	F	M	wt
AB0142-Cb	AB0142-C	BFcol	AB0142-Cb [Burkina Faso, Sour, M F]	Burkina Faso	Sour	F	M	wt
AB0143-Ca	AB0143-C	BFgam	AB0143-Ca [Burkina Faso, Sour, S F]	Burkina Faso	Sour	F	S	wt
AB0143-Cb	AB0143-C	BFgam	AB0143-Cb [Burkina Faso, Sour, S F]	Burkina Faso	Sour	F	S	wt
AB0145-Ca	AB0145-C	BFgam	AB0145-Ca [Burkina Faso, Sour, S F]	Burkina Faso	Sour	F	S	wt
AB0145-Cb	AB0145-C	BFgam	AB0145-Cb [Burkina Faso, Sour, S F]	Burkina Faso	Sour	F	S	wt
AB0146-Ca	AB0146-C	BFgam	AB0146-Ca [Burkina Faso, Sour, S F]	Burkina Faso	Sour	F	S	C4
AB0146-Cb	AB0146-C	BFgam	AB0146-Cb [Burkina Faso, Sour, S F]	Burkina Faso	Sour	F	S	wt
AB0147-Ca	AB0147-C	BFgam	AB0147-Ca [Burkina Faso, Sour, S F]	Burkina Faso	Sour	F	S	wt
AB0147-Cb	AB0147-C	BFgam	AB0147-Cb [Burkina Faso, Sour, S F]	Burkina Faso	Sour	F	S	wt
AB0148-Ca	AB0148-C	BFgam	AB0148-Ca [Burkina Faso, Sour, S F]	Burkina Faso	Sour	F	S	wt
AB0148-Cb	AB0148-C	BFgam	AB0148-Cb [Burkina Faso, Sour, S F]	Burkina Faso	Sour	F	S	wt
AB0150-Ca	AB0150-C	BFgam	AB0150-Ca [Burkina Faso, Bana, S M]	Burkina Faso	Bana	M	S	wt
AB0150-Cb	AB0150-C	BFgam	AB0150-Cb [Burkina Faso, Bana, S M]	Burkina Faso	Bana	M	S	wt
AB0151-Ca	AB0151-C	BFgam	AB0151-Ca [Burkina Faso, Bana, S M]	Burkina Faso	Bana	M	S	wt
AB0151-Cb	AB0151-C	BFgam	AB0151-Cb [Burkina Faso, Bana, S M]	Burkina Faso	Bana	M	S	wt
AB0153-Ca	AB0153-C	BFgam	AB0153-Ca [Burkina Faso, Bana, S M]	Burkina Faso	Bana	M	S	wt
AB0153-Cb	AB0153-C	BFgam	AB0153-Cb [Burkina Faso, Bana, S M]	Burkina Faso	Bana	M	S	wt
AB0155-Ca	AB0155-C	BFgam	AB0155-Ca [Burkina Faso, Bana, S M]	Burkina Faso	Bana	M	S	wt
AB0155-Cb	AB0155-C	BFgam	AB0155-Cb [Burkina Faso, Bana, S M]	Burkina Faso	Bana	M	S	wt
AB0157-Ca	AB0157-C	BFgam	AB0157-Ca [Burkina Faso, Bana, S M]	Burkina Faso	Bana	M	S	wt
AB0157-Cb	AB0157-C	BFgam	AB0157-Cb [Burkina Faso, Bana, S M]	Burkina Faso	Bana	M	S	wt
AB0158-Ca	AB0158-C	BFgam	AB0158-Ca [Burkina Faso, Bana, S M]	Burkina Faso	Bana	M	S	wt
AB0158-Cb	AB0158-C	BFgam	AB0158-Cb [Burkina Faso, Bana, S M]	Burkina Faso	Bana	M	S	wt
AB0159-Ca	AB0159-C	BFgam	AB0159-Ca [Burkina Faso, Bana, S M]	Burkina Faso	Bana	M	S	wt
AB0159-Cb	AB0159-C	BFgam	AB0159-Cb [Burkina Faso, Bana, S M]	Burkina Faso	Bana	M	S	wt
AB0160-Ca	AB0160-C	BFgam	AB0160-Ca [Burkina Faso, Bana, S M]	Burkina Faso	Bana	M	S	wt
AB0160-Cb	AB0160-C	BFgam	AB0160-Cb [Burkina Faso, Bana, S M]	Burkina Faso	Bana	M	S	wt
AB0161-Ca	AB0161-C	BFgam	AB0161-Ca [Burkina Faso, Bana, S M]	Burkina Faso	Bana	M	S	wt
AB0161-Cb	AB0161-C	BFgam	AB0161-Cb [Burkina Faso, Bana, S M]	Burkina Faso	Bana	M	S	wt
AB0162-Ca	AB0162-C	BFgam	AB0162-Ca [Burkina Faso, Pala, S M]	Burkina Faso	Pala	M	S	wt
AB0162-Cb	AB0162-C	BFgam	AB0162-Cb [Burkina Faso, Pala, S M]	Burkina Faso	Pala	M	S	wt
AB0164-Ca	AB0164-C	BFgam	AB0164-Ca [Burkina Faso, Pala, S M]	Burkina Faso	Pala	M	S	wt
AB0164-Cb	AB0164-C	BFgam	AB0164-Cb [Burkina Faso, Pala, S M]	Burkina Faso	Pala	M	S	wt
AB0165-Ca	AB0165-C	BFgam	AB0165-Ca [Burkina Faso, Pala, S M]	Burkina Faso	Pala	M	S	wt
AB0165-Cb	AB0165-C	BFgam	AB0165-Cb [Burkina Faso, Pala, S M]	Burkina Faso	Pala	M	S	wt
AB0166-Ca	AB0166-C	BFgam	AB0166-Ca [Burkina Faso, Pala, S M]	Burkina Faso	Pala	M	S	wt
AB0166-Cb	AB0166-C	BFgam	AB0166-Cb [Burkina Faso, Pala, S M]	Burkina Faso	Pala	M	S	wt
AB0167-Ca	AB0167-C	BFgam	AB0167-Ca [Burkina Faso, Pala, S M]	Burkina Faso	Pala	M	S	wt
AB0167-Cb	AB0167-C	BFgam	AB0167-Cb [Burkina Faso, Pala, S M]	Burkina Faso	Pala	M	S	wt
AB0169-Ca	AB0169-C	BFgam	AB0169-Ca [Burkina Faso, Pala, S M]	Burkina Faso	Pala	M	S	wt
AB0169-Cb	AB0169-C	BFgam	AB0169-Cb [Burkina Faso, Pala, S M]	Burkina Faso	Pala	M	S	wt
AB0170-Ca	AB0170-C	BFgam	AB0170-Ca [Burkina Faso, Pala, S M]	Burkina Faso	Pala	M	S	wt
AB0170-Cb	AB0170-C	BFgam	AB0170-Cb [Burkina Faso, Pala, S M]	Burkina Faso	Pala	M	S	wt
AB0171-Ca	AB0171-C	BFgam	AB0171-Ca [Burkina Faso, Pala, S M]	Burkina Faso	Pala	M	S	wt
AB0171-Cb	AB0171-C	BFgam	AB0171-Cb [Burkina Faso, Pala, S M]	Burkina Faso	Pala	M	S	wt
AB0172-Ca	AB0172-C	BFgam	AB0172-Ca [Burkina Faso, Pala, S F]	Burkina Faso	Pala	F	S	wt
AB0172-Cb	AB0172-C	BFgam	AB0172-Cb [Burkina Faso, Pala, S F]	Burkina Faso	Pala	F	S	wt
AB0173-Ca	AB0173-C	BFgam	AB0173-Ca [Burkina Faso, Pala, S F]	Burkina Faso	Pala	F	S	wt
AB0173-Cb	AB0173-C	BFgam	AB0173-Cb [Burkina Faso, Pala, S F]	Burkina Faso	Pala	F	S	wt
AB0174-Ca	AB0174-C	BFgam	AB0174-Ca [Burkina Faso, Pala, S F]	Burkina Faso	Pala	F	S	wt
AB0174-Cb	AB0174-C	BFgam	AB0174-Cb [Burkina Faso, Pala, S F]	Burkina Faso	Pala	F	S	wt
AB0175-Ca	AB0175-C	BFgam	AB0175-Ca [Burkina Faso, Pala, S F]	Burkina Faso	Pala	F	S	wt
AB0175-Cb	AB0175-C	BFgam	AB0175-Cb [Burkina Faso, Pala, S F]	Burkina Faso	Pala	F	S	wt
AB0176-Ca	AB0176-C	BFgam	AB0176-Ca [Burkina Faso, Pala, S F]	Burkina Faso	Pala	F	S	wt
AB0176-Cb	AB0176-C	BFgam	AB0176-Cb [Burkina Faso, Pala, S F]	Burkina Faso	Pala	F	S	wt
AB0177-Ca	AB0177-C	BFgam	AB0177-Ca [Burkina Faso, Pala, S F]	Burkina Faso	Pala	F	S	C3
AB0177-Cb	AB0177-C	BFgam	AB0177-Cb [Burkina Faso, Pala, S F]	Burkina Faso	Pala	F	S	wt
AB0178-Ca	AB0178-C	BFgam	AB0178-Ca [Burkina Faso, Pala, S F]	Burkina Faso	Pala	F	S	wt
AB0178-Cb	AB0178-C	BFgam	AB0178-Cb [Burkina Faso, Pala, S F]	Burkina Faso	Pala	F	S	wt
AB0179-Ca	AB0179-C	BFgam	AB0179-Ca [Burkina Faso, Pala, S F]	Burkina Faso	Pala	F	S	wt
AB0179-Cb	AB0179-C	BFgam	AB0179-Cb [Burkina Faso, Pala, S F]	Burkina Faso	Pala	F	S	wt
AB0181-Ca	AB0181-C	BFcol	AB0181-Ca [Burkina Faso, Bana M, M F]	Burkina Faso	Bana M	F	M	wt
AB0181-Cb	AB0181-C	BFcol	AB0181-Cb [Burkina Faso, Bana M, M F]	Burkina Faso	Bana M	F	M	wt
AB0182-Ca	AB0182-C	BFcol	AB0182-Ca [Burkina Faso, Bana M, M F]	Burkina Faso	Bana M	F	M	C5
AB0182-Cb	AB0182-C	BFcol	AB0182-Cb [Burkina Faso, Bana M, M F]	Burkina Faso	Bana M	F	M	wt
AB0183-Ca	AB0183-C	BFcol	AB0183-Ca [Burkina Faso, Bana M, M F]	Burkina Faso	Bana M	F	M	wt
AB0183-Cb	AB0183-C	BFcol	AB0183-Cb [Burkina Faso, Bana M, M F]	Burkina Faso	Bana M	F	M	wt
AB0184-Ca	AB0184-C	BFcol	AB0184-Ca [Burkina Faso, Bana M, M F]	Burkina Faso	Bana M	F	M	C5
AB0184-Cb	AB0184-C	BFcol	AB0184-Cb [Burkina Faso, Bana M, M F]	Burkina Faso	Bana M	F	M	wt
AB0185-Ca	AB0185-C	BFcol	AB0185-Ca [Burkina Faso, Bana M, M F]	Burkina Faso	Bana M	F	M	wt
AB0185-Cb	AB0185-C	BFcol	AB0185-Cb [Burkina Faso, Bana M, M F]	Burkina Faso	Bana M	F	M	wt
AB0186-Ca	AB0186-C	BFcol	AB0186-Ca [Burkina Faso, Bana M, M F]	Burkina Faso	Bana M	F	M	wt
AB0186-Cb	AB0186-C	BFcol	AB0186-Cb [Burkina Faso, Bana M, M F]	Burkina Faso	Bana M	F	M	wt
AB0187-Ca	AB0187-C	BFcol	AB0187-Ca [Burkina Faso, Bana M, M F]	Burkina Faso	Bana M	F	M	wt
AB0187-Cb	AB0187-C	BFcol	AB0187-Cb [Burkina Faso, Bana M, M F]	Burkina Faso	Bana M	F	M	wt
AB0188-Ca	AB0188-C	BFcol	AB0188-Ca [Burkina Faso, Bana M, M F]	Burkina Faso	Bana M	F	M	wt
AB0188-Cb	AB0188-C	BFcol	AB0188-Cb [Burkina Faso, Bana M, M F]	Burkina Faso	Bana M	F	M	wt
AB0189-Ca	AB0189-C	BFcol	AB0189-Ca [Burkina Faso, Bana M, M F]	Burkina Faso	Bana M	F	M	wt
AB0189-Cb	AB0189-C	BFcol	AB0189-Cb [Burkina Faso, Bana M, M F]	Burkina Faso	Bana M	F	M	wt
AB0190-Ca	AB0190-C	BFcol	AB0190-Ca [Burkina Faso, Bana M, M F]	Burkina Faso	Bana M	F	M	wt
AB0190-Cb	AB0190-C	BFcol	AB0190-Cb [Burkina Faso, Bana M, M F]	Burkina Faso	Bana M	F	M	wt
AB0191-Ca	AB0191-C	BFcol	AB0191-Ca [Burkina Faso, Bana V, M F]	Burkina Faso	Bana V	F	M	wt
AB0191-Cb	AB0191-C	BFcol	AB0191-Cb [Burkina Faso, Bana V, M F]	Burkina Faso	Bana V	F	M	wt
AB0192-Ca	AB0192-C	BFcol	AB0192-Ca [Burkina Faso, Bana V, M F]	Burkina Faso	Bana V	F	M	wt
AB0192-Cb	AB0192-C	BFcol	AB0192-Cb [Burkina Faso, Bana V, M F]	Burkina Faso	Bana V	F	M	wt
AB0195-Ca	AB0195-C	BFcol	AB0195-Ca [Burkina Faso, Bana V, M F]	Burkina Faso	Bana V	F	M	wt
AB0195-Cb	AB0195-C	BFcol	AB0195-Cb [Burkina Faso, Bana V, M F]	Burkina Faso	Bana V	F	M	wt
AB0196-Ca	AB0196-C	BFcol	AB0196-Ca [Burkina Faso, Bana V, M F]	Burkina Faso	Bana V	F	M	wt
AB0196-Cb	AB0196-C	BFcol	AB0196-Cb [Burkina Faso, Bana V, M F]	Burkina Faso	Bana V	F	M	wt
AB0197-Ca	AB0197-C	BFgam	AB0197-Ca [Burkina Faso, Pala, S F]	Burkina Faso	Pala	F	S	C3
AB0197-Cb	AB0197-C	BFgam	AB0197-Cb [Burkina Faso, Pala, S F]	Burkina Faso	Pala	F	S	wt
AB0198-Ca	AB0198-C	BFgam	AB0198-Ca [Burkina Faso, Pala, S F]	Burkina Faso	Pala	F	S	wt
AB0198-Cb	AB0198-C	BFgam	AB0198-Cb [Burkina Faso, Pala, S F]	Burkina Faso	Pala	F	S	wt
AB0199-Ca	AB0199-C	BFgam	AB0199-Ca [Burkina Faso, Pala, S F]	Burkina Faso	Pala	F	S	wt
AB0199-Cb	AB0199-C	BFgam	AB0199-Cb [Burkina Faso, Pala, S F]	Burkina Faso	Pala	F	S	wt
AB0200-Ca	AB0200-C	BFgam	AB0200-Ca [Burkina Faso, Pala, S F]	Burkina Faso	Pala	F	S	wt
AB0200-Cb	AB0200-C	BFgam	AB0200-Cb [Burkina Faso, Pala, S F]	Burkina Faso	Pala	F	S	wt
AB0201-Ca	AB0201-C	BFgam	AB0201-Ca [Burkina Faso, Pala, S F]	Burkina Faso	Pala	F	S	wt
AB0201-Cb	AB0201-C	BFgam	AB0201-Cb [Burkina Faso, Pala, S F]	Burkina Faso	Pala	F	S	wt
AB0202-Ca	AB0202-C	BFgam	AB0202-Ca [Burkina Faso, Pala, S F]	Burkina Faso	Pala	F	S	wt
AB0202-Cb	AB0202-C	BFgam	AB0202-Cb [Burkina Faso, Pala, S F]	Burkina Faso	Pala	F	S	wt
AB0203-Ca	AB0203-C	BFgam	AB0203-Ca [Burkina Faso, Pala, S F]	Burkina Faso	Pala	F	S	wt
AB0203-Cb	AB0203-C	BFgam	AB0203-Cb [Burkina Faso, Pala, S F]	Burkina Faso	Pala	F	S	wt
AB0204-Ca	AB0204-C	BFcol	AB0204-Ca [Burkina Faso, Pala, M F]	Burkina Faso	Pala	F	M	wt
AB0204-Cb	AB0204-C	BFcol	AB0204-Cb [Burkina Faso, Pala, M F]	Burkina Faso	Pala	F	M	wt
AB0205-Ca	AB0205-C	BFgam	AB0205-Ca [Burkina Faso, Pala, S F]	Burkina Faso	Pala	F	S	wt
AB0205-Cb	AB0205-C	BFgam	AB0205-Cb [Burkina Faso, Pala, S F]	Burkina Faso	Pala	F	S	wt
AB0206-Ca	AB0206-C	BFgam	AB0206-Ca [Burkina Faso, Pala, S F]	Burkina Faso	Pala	F	S	wt
AB0206-Cb	AB0206-C	BFgam	AB0206-Cb [Burkina Faso, Pala, S F]	Burkina Faso	Pala	F	S	wt
AB0207-Ca	AB0207-C	BFgam	AB0207-Ca [Burkina Faso, Sour, S F]	Burkina Faso	Sour	F	S	wt
AB0207-Cb	AB0207-C	BFgam	AB0207-Cb [Burkina Faso, Sour, S F]	Burkina Faso	Sour	F	S	wt
AB0208-Ca	AB0208-C	BFgam	AB0208-Ca [Burkina Faso, Sour, S F]	Burkina Faso	Sour	F	S	wt
AB0208-Cb	AB0208-C	BFgam	AB0208-Cb [Burkina Faso, Sour, S F]	Burkina Faso	Sour	F	S	wt
AB0209-Ca	AB0209-C	BFcol	AB0209-Ca [Burkina Faso, Bana V, M F]	Burkina Faso	Bana V	F	M	wt
AB0209-Cb	AB0209-C	BFcol	AB0209-Cb [Burkina Faso, Bana V, M F]	Burkina Faso	Bana V	F	M	wt
AB0210-Ca	AB0210-C	BFcol	AB0210-Ca [Burkina Faso, Bana V, M F]	Burkina Faso	Bana V	F	M	wt
AB0210-Cb	AB0210-C	BFcol	AB0210-Cb [Burkina Faso, Bana V, M F]	Burkina Faso	Bana V	F	M	wt
AB0211-Ca	AB0211-C	BFgam	AB0211-Ca [Burkina Faso, Bana V, S F]	Burkina Faso	Bana V	F	S	wt
AB0211-Cb	AB0211-C	BFgam	AB0211-Cb [Burkina Faso, Bana V, S F]	Burkina Faso	Bana V	F	S	wt
AB0212-Ca	AB0212-C	BFcol	AB0212-Ca [Burkina Faso, Bana V, M F]	Burkina Faso	Bana V	F	M	wt
AB0212-Cb	AB0212-C	BFcol	AB0212-Cb [Burkina Faso, Bana V, M F]	Burkina Faso	Bana V	F	M	wt
AB0213-Ca	AB0213-C	BFcol	AB0213-Ca [Burkina Faso, Sour, M F]	Burkina Faso	Sour	F	M	C1
AB0213-Cb	AB0213-C	BFcol	AB0213-Cb [Burkina Faso, Sour, M F]	Burkina Faso	Sour	F	M	wt
AB0215-Ca	AB0215-C	BFcol	AB0215-Ca [Burkina Faso, Sour, M F]	Burkina Faso	Sour	F	M	wt
AB0215-Cb	AB0215-C	BFcol	AB0215-Cb [Burkina Faso, Sour, M F]	Burkina Faso	Sour	F	M	wt
AB0217-Ca	AB0217-C	BFgam	AB0217-Ca [Burkina Faso, Sour, S F]	Burkina Faso	Sour	F	S	wt
AB0217-Cb	AB0217-C	BFgam	AB0217-Cb [Burkina Faso, Sour, S F]	Burkina Faso	Sour	F	S	wt
AB0218-Ca	AB0218-C	BFgam	AB0218-Ca [Burkina Faso, Sour, S F]	Burkina Faso	Sour	F	S	wt
AB0218-Cb	AB0218-C	BFgam	AB0218-Cb [Burkina Faso, Sour, S F]	Burkina Faso	Sour	F	S	wt
AB0219-Ca	AB0219-C	BFcol	AB0219-Ca [Burkina Faso, Sour, M F]	Burkina Faso	Sour	F	M	wt
AB0219-Cb	AB0219-C	BFcol	AB0219-Cb [Burkina Faso, Sour, M F]	Burkina Faso	Sour	F	M	wt
AB0221-Ca	AB0221-C	BFcol	AB0221-Ca [Burkina Faso, Sour, M F]	Burkina Faso	Sour	F	M	wt
AB0221-Cb	AB0221-C	BFcol	AB0221-Cb [Burkina Faso, Sour, M F]	Burkina Faso	Sour	F	M	wt
AB0222-Ca	AB0222-C	BFcol	AB0222-Ca [Burkina Faso, Sour, M F]	Burkina Faso	Sour	F	M	wt
AB0222-Cb	AB0222-C	BFcol	AB0222-Cb [Burkina Faso, Sour, M F]	Burkina Faso	Sour	F	M	wt
AB0223-Ca	AB0223-C	BFcol	AB0223-Ca [Burkina Faso, Sour, M F]	Burkina Faso	Sour	F	M	wt
AB0223-Cb	AB0223-C	BFcol	AB0223-Cb [Burkina Faso, Sour, M F]	Burkina Faso	Sour	F	M	wt
AB0224-Ca	AB0224-C	BFcol	AB0224-Ca [Burkina Faso, Sour, M F]	Burkina Faso	Sour	F	M	wt
AB0224-Cb	AB0224-C	BFcol	AB0224-Cb [Burkina Faso, Sour, M F]	Burkina Faso	Sour	F	M	wt
AB0226-Ca	AB0226-C	BFcol	AB0226-Ca [Burkina Faso, Sour, M F]	Burkina Faso	Sour	F	M	wt
AB0226-Cb	AB0226-C	BFcol	AB0226-Cb [Burkina Faso, Sour, M F]	Burkina Faso	Sour	F	M	wt
AB0227-Ca	AB0227-C	BFcol	AB0227-Ca [Burkina Faso, Sour, M F]	Burkina Faso	Sour	F	M	wt
AB0227-Cb	AB0227-C	BFcol	AB0227-Cb [Burkina Faso, Sour, M F]	Burkina Faso	Sour	F	M	wt
AB0228-Ca	AB0228-C	BFgam	AB0228-Ca [Burkina Faso, Sour, S F]	Burkina Faso	Sour	F	S	wt
AB0228-Cb	AB0228-C	BFgam	AB0228-Cb [Burkina Faso, Sour, S F]	Burkina Faso	Sour	F	S	wt
AB0229-Ca	AB0229-C	BFcol	AB0229-Ca [Burkina Faso, Sour, M F]	Burkina Faso	Sour	F	M	wt
AB0229-Cb	AB0229-C	BFcol	AB0229-Cb [Burkina Faso, Sour, M F]	Burkina Faso	Sour	F	M	wt
AB0231-Ca	AB0231-C	BFgam	AB0231-Ca [Burkina Faso, Sour, S F]	Burkina Faso	Sour	F	S	wt
AB0231-Cb	AB0231-C	BFgam	AB0231-Cb [Burkina Faso, Sour, S F]	Burkina Faso	Sour	F	S	wt
AB0232-Ca	AB0232-C	BFgam	AB0232-Ca [Burkina Faso, Sour, S F]	Burkina Faso	Sour	F	S	wt
AB0232-Cb	AB0232-C	BFgam	AB0232-Cb [Burkina Faso, Sour, S F]	Burkina Faso	Sour	F	S	wt
AB0233-Ca	AB0233-C	BFgam	AB0233-Ca [Burkina Faso, Sour, S F]	Burkina Faso	Sour	F	S	wt
AB0233-Cb	AB0233-C	BFgam	AB0233-Cb [Burkina Faso, Sour, S F]	Burkina Faso	Sour	F	S	wt
AB0234-Ca	AB0234-C	BFcol	AB0234-Ca [Burkina Faso, Sour, M F]	Burkina Faso	Sour	F	M	wt
AB0234-Cb	AB0234-C	BFcol	AB0234-Cb [Burkina Faso, Sour, M F]	Burkina Faso	Sour	F	M	wt
AB0235-Ca	AB0235-C	BFgam	AB0235-Ca [Burkina Faso, Sour, S F]	Burkina Faso	Sour	F	S	wt
AB0235-Cb	AB0235-C	BFgam	AB0235-Cb [Burkina Faso, Sour, S F]	Burkina Faso	Sour	F	S	wt
AB0236-Ca	AB0236-C	BFgam	AB0236-Ca [Burkina Faso, Sour, S F]	Burkina Faso	Sour	F	S	wt
AB0236-Cb	AB0236-C	BFgam	AB0236-Cb [Burkina Faso, Sour, S F]	Burkina Faso	Sour	F	S	wt
AB0237-Ca	AB0237-C	BFcol	AB0237-Ca [Burkina Faso, Sour, M F]	Burkina Faso	Sour	F	M	wt
AB0237-Cb	AB0237-C	BFcol	AB0237-Cb [Burkina Faso, Sour, M F]	Burkina Faso	Sour	F	M	wt
AB0238-Ca	AB0238-C	BFgam	AB0238-Ca [Burkina Faso, Sour, S F]	Burkina Faso	Sour	F	S	wt
AB0238-Cb	AB0238-C	BFgam	AB0238-Cb [Burkina Faso, Sour, S F]	Burkina Faso	Sour	F	S	C4
AB0239-Ca	AB0239-C	BFgam	AB0239-Ca [Burkina Faso, Sour, S F]	Burkina Faso	Sour	F	S	wt
AB0239-Cb	AB0239-C	BFgam	AB0239-Cb [Burkina Faso, Sour, S F]	Burkina Faso	Sour	F	S	wt
AB0240-Ca	AB0240-C	BFcol	AB0240-Ca [Burkina Faso, Sour, M F]	Burkina Faso	Sour	F	M	wt
AB0240-Cb	AB0240-C	BFcol	AB0240-Cb [Burkina Faso, Sour, M F]	Burkina Faso	Sour	F	M	wt
AB0241-Ca	AB0241-C	BFgam	AB0241-Ca [Burkina Faso, Sour, S F]	Burkina Faso	Sour	F	S	wt
AB0241-Cb	AB0241-C	BFgam	AB0241-Cb [Burkina Faso, Sour, S F]	Burkina Faso	Sour	F	S	wt
AB0242-Ca	AB0242-C	BFcol	AB0242-Ca [Burkina Faso, Sour, M F]	Burkina Faso	Sour	F	M	wt
AB0242-Cb	AB0242-C	BFcol	AB0242-Cb [Burkina Faso, Sour, M F]	Burkina Faso	Sour	F	M	C5
AB0243-Ca	AB0243-C	BFcol	AB0243-Ca [Burkina Faso, Sour, M F]	Burkina Faso	Sour	F	M	wt
AB0243-Cb	AB0243-C	BFcol	AB0243-Cb [Burkina Faso, Sour, M F]	Burkina Faso	Sour	F	M	wt
AB0244-Ca	AB0244-C	BFgam	AB0244-Ca [Burkina Faso, Sour, S F]	Burkina Faso	Sour	F	S	wt
AB0244-Cb	AB0244-C	BFgam	AB0244-Cb [Burkina Faso, Sour, S F]	Burkina Faso	Sour	F	S	wt
AB0246-Ca	AB0246-C	BFcol	AB0246-Ca [Burkina Faso, Sour, M F]	Burkina Faso	Sour	F	M	wt
AB0246-Cb	AB0246-C	BFcol	AB0246-Cb [Burkina Faso, Sour, M F]	Burkina Faso	Sour	F	M	wt
AB0247-Ca	AB0247-C	BFcol	AB0247-Ca [Burkina Faso, Sour, M F]	Burkina Faso	Sour	F	M	wt
AB0247-Cb	AB0247-C	BFcol	AB0247-Cb [Burkina Faso, Sour, M F]	Burkina Faso	Sour	F	M	wt
AB0248-Ca	AB0248-C	BFcol	AB0248-Ca [Burkina Faso, Sour, M F]	Burkina Faso	Sour	F	M	wt
AB0248-Cb	AB0248-C	BFcol	AB0248-Cb [Burkina Faso, Sour, M F]	Burkina Faso	Sour	F	M	wt
AB0249-Ca	AB0249-C	BFcol	AB0249-Ca [Burkina Faso, Sour, M F]	Burkina Faso	Sour	F	M	wt
AB0249-Cb	AB0249-C	BFcol	AB0249-Cb [Burkina Faso, Sour, M F]	Burkina Faso	Sour	F	M	wt
AB0250-Ca	AB0250-C	BFcol	AB0250-Ca [Burkina Faso, Sour, M F]	Burkina Faso	Sour	F	M	wt
AB0250-Cb	AB0250-C	BFcol	AB0250-Cb [Burkina Faso, Sour, M F]	Burkina Faso	Sour	F	M	wt
AB0251-Ca	AB0251-C	BFgam	AB0251-Ca [Burkina Faso, Sour, S F]	Burkina Faso	Sour	F	S	wt
AB0251-Cb	AB0251-C	BFgam	AB0251-Cb [Burkina Faso, Sour, S F]	Burkina Faso	Sour	F	S	wt
AB0252-Ca	AB0252-C	BFgam	AB0252-Ca [Burkina Faso, Sour, S F]	Burkina Faso	Sour	F	S	wt
AB0252-Cb	AB0252-C	BFgam	AB0252-Cb [Burkina Faso, Sour, S F]	Burkina Faso	Sour	F	S	wt
AB0253-Ca	AB0253-C	BFgam	AB0253-Ca [Burkina Faso, Sour, S F]	Burkina Faso	Sour	F	S	wt
AB0253-Cb	AB0253-C	BFgam	AB0253-Cb [Burkina Faso, Sour, S F]	Burkina Faso	Sour	F	S	wt
AB0255-Ca	AB0255-C	BFgam	AB0255-Ca [Burkina Faso, Pala, S F]	Burkina Faso	Pala	F	S	wt
AB0255-Cb	AB0255-C	BFgam	AB0255-Cb [Burkina Faso, Pala, S F]	Burkina Faso	Pala	F	S	wt
AB0256-Ca	AB0256-C	BFgam	AB0256-Ca [Burkina Faso, Pala, S F]	Burkina Faso	Pala	F	S	wt
AB0256-Cb	AB0256-C	BFgam	AB0256-Cb [Burkina Faso, Pala, S F]	Burkina Faso	Pala	F	S	wt
AB0257-Ca	AB0257-C	BFcol	AB0257-Ca [Burkina Faso, Pala, M F]	Burkina Faso	Pala	F	M	wt
AB0257-Cb	AB0257-C	BFcol	AB0257-Cb [Burkina Faso, Pala, M F]	Burkina Faso	Pala	F	M	wt
AB0258-Ca	AB0258-C	BFcol	AB0258-Ca [Burkina Faso, Pala, M F]	Burkina Faso	Pala	F	M	C5
AB0258-Cb	AB0258-C	BFcol	AB0258-Cb [Burkina Faso, Pala, M F]	Burkina Faso	Pala	F	M	wt
AB0260-Ca	AB0260-C	BFgam	AB0260-Ca [Burkina Faso, Pala, S F]	Burkina Faso	Pala	F	S	wt
AB0260-Cb	AB0260-C	BFgam	AB0260-Cb [Burkina Faso, Pala, S F]	Burkina Faso	Pala	F	S	wt
AB0261-Ca	AB0261-C	BFgam	AB0261-Ca [Burkina Faso, Pala, S F]	Burkina Faso	Pala	F	S	wt
AB0261-Cb	AB0261-C	BFgam	AB0261-Cb [Burkina Faso, Pala, S F]	Burkina Faso	Pala	F	S	wt
AB0262-Ca	AB0262-C	BFcol	AB0262-Ca [Burkina Faso, Pala, M F]	Burkina Faso	Pala	F	M	wt
AB0262-Cb	AB0262-C	BFcol	AB0262-Cb [Burkina Faso, Pala, M F]	Burkina Faso	Pala	F	M	wt
AB0263-Ca	AB0263-C	BFcol	AB0263-Ca [Burkina Faso, Pala, M F]	Burkina Faso	Pala	F	M	wt
AB0263-Cb	AB0263-C	BFcol	AB0263-Cb [Burkina Faso, Pala, M F]	Burkina Faso	Pala	F	M	wt
AB0264-Ca	AB0264-C	BFgam	AB0264-Ca [Burkina Faso, Pala, S F]	Burkina Faso	Pala	F	S	wt
AB0264-Cb	AB0264-C	BFgam	AB0264-Cb [Burkina Faso, Pala, S F]	Burkina Faso	Pala	F	S	wt
AB0265-Ca	AB0265-C	BFgam	AB0265-Ca [Burkina Faso, Pala, S F]	Burkina Faso	Pala	F	S	wt
AB0265-Cb	AB0265-C	BFgam	AB0265-Cb [Burkina Faso, Pala, S F]	Burkina Faso	Pala	F	S	wt
AB0266-Ca	AB0266-C	BFcol	AB0266-Ca [Burkina Faso, Pala, M F]	Burkina Faso	Pala	F	M	wt
AB0266-Cb	AB0266-C	BFcol	AB0266-Cb [Burkina Faso, Pala, M F]	Burkina Faso	Pala	F	M	wt
AB0267-Ca	AB0267-C	BFcol	AB0267-Ca [Burkina Faso, Pala, M F]	Burkina Faso	Pala	F	M	wt
AB0267-Cb	AB0267-C	BFcol	AB0267-Cb [Burkina Faso, Pala, M F]	Burkina Faso	Pala	F	M	wt
AB0268-Ca	AB0268-C	BFgam	AB0268-Ca [Burkina Faso, Pala, S F]	Burkina Faso	Pala	F	S	wt
AB0268-Cb	AB0268-C	BFgam	AB0268-Cb [Burkina Faso, Pala, S F]	Burkina Faso	Pala	F	S	wt
AB0270-Ca	AB0270-C	BFgam	AB0270-Ca [Burkina Faso, Pala, S F]	Burkina Faso	Pala	F	S	wt
AB0270-Cb	AB0270-C	BFgam	AB0270-Cb [Burkina Faso, Pala, S F]	Burkina Faso	Pala	F	S	wt
AB0271-Ca	AB0271-C	BFgam	AB0271-Ca [Burkina Faso, Pala, S F]	Burkina Faso	Pala	F	S	wt
AB0271-Cb	AB0271-C	BFgam	AB0271-Cb [Burkina Faso, Pala, S F]	Burkina Faso	Pala	F	S	wt
AB0272-Ca	AB0272-C	BFgam	AB0272-Ca [Burkina Faso, Pala, S F]	Burkina Faso	Pala	F	S	wt
AB0272-Cb	AB0272-C	BFgam	AB0272-Cb [Burkina Faso, Pala, S F]	Burkina Faso	Pala	F	S	wt
AB0273-Ca	AB0273-C	BFgam	AB0273-Ca [Burkina Faso, Pala, S F]	Burkina Faso	Pala	F	S	wt
AB0273-Cb	AB0273-C	BFgam	AB0273-Cb [Burkina Faso, Pala, S F]	Burkina Faso	Pala	F	S	wt
AB0274-Ca	AB0274-C	BFgam	AB0274-Ca [Burkina Faso, Pala, S F]	Burkina Faso	Pala	F	S	wt
AB0274-Cb	AB0274-C	BFgam	AB0274-Cb [Burkina Faso, Pala, S F]	Burkina Faso	Pala	F	S	wt
AB0275-Ca	AB0275-C	BFgam	AB0275-Ca [Burkina Faso, Pala, S F]	Burkina Faso	Pala	F	S	wt
AB0275-Cb	AB0275-C	BFgam	AB0275-Cb [Burkina Faso, Pala, S F]	Burkina Faso	Pala	F	S	wt
AB0276-Ca	AB0276-C	BFcol	AB0276-Ca [Burkina Faso, Pala, M F]	Burkina Faso	Pala	F	M	C5
AB0276-Cb	AB0276-C	BFcol	AB0276-Cb [Burkina Faso, Pala, M F]	Burkina Faso	Pala	F	M	wt
AB0277-Ca	AB0277-C	BFgam	AB0277-Ca [Burkina Faso, Pala, S F]	Burkina Faso	Pala	F	S	wt
AB0277-Cb	AB0277-C	BFgam	AB0277-Cb [Burkina Faso, Pala, S F]	Burkina Faso	Pala	F	S	wt
AB0278-Ca	AB0278-C	BFgam	AB0278-Ca [Burkina Faso, Pala, S F]	Burkina Faso	Pala	F	S	wt
AB0278-Cb	AB0278-C	BFgam	AB0278-Cb [Burkina Faso, Pala, S F]	Burkina Faso	Pala	F	S	wt
AB0279-Ca	AB0279-C	BFcol	AB0279-Ca [Burkina Faso, Pala, M F]	Burkina Faso	Pala	F	M	wt
AB0279-Cb	AB0279-C	BFcol	AB0279-Cb [Burkina Faso, Pala, M F]	Burkina Faso	Pala	F	M	wt
AB0280-Ca	AB0280-C	BFgam	AB0280-Ca [Burkina Faso, Pala, S F]	Burkina Faso	Pala	F	S	wt
AB0280-Cb	AB0280-C	BFgam	AB0280-Cb [Burkina Faso, Pala, S F]	Burkina Faso	Pala	F	S	wt
AB0281-Ca	AB0281-C	BFgam	AB0281-Ca [Burkina Faso, Pala, S F]	Burkina Faso	Pala	F	S	wt
AB0281-Cb	AB0281-C	BFgam	AB0281-Cb [Burkina Faso, Pala, S F]	Burkina Faso	Pala	F	S	wt
AB0282-Ca	AB0282-C	BFcol	AB0282-Ca [Burkina Faso, Pala, M F]	Burkina Faso	Pala	F	M	wt
AB0282-Cb	AB0282-C	BFcol	AB0282-Cb [Burkina Faso, Pala, M F]	Burkina Faso	Pala	F	M	wt
AB0283-Ca	AB0283-C	BFgam	AB0283-Ca [Burkina Faso, Pala, S F]	Burkina Faso	Pala	F	S	wt
AB0283-Cb	AB0283-C	BFgam	AB0283-Cb [Burkina Faso, Pala, S F]	Burkina Faso	Pala	F	S	wt
AB0284-Ca	AB0284-C	BFgam	AB0284-Ca [Burkina Faso, Pala, S F]	Burkina Faso	Pala	F	S	wt
AB0284-Cb	AB0284-C	BFgam	AB0284-Cb [Burkina Faso, Pala, S F]	Burkina Faso	Pala	F	S	wt
AC0089-Ca	AC0089-C	UGgam	AC0089-Ca [Uganda, Nagongera, Tororo, S F]	Uganda	Nagongera, Tororo	F	S	wt
AC0089-Cb	AC0089-C	UGgam	AC0089-Cb [Uganda, Nagongera, Tororo, S F]	Uganda	Nagongera, Tororo	F	S	wt
AC0090-Ca	AC0090-C	UGgam	AC0090-Ca [Uganda, Nagongera, Tororo, S F]	Uganda	Nagongera, Tororo	F	S	wt
AC0090-Cb	AC0090-C	UGgam	AC0090-Cb [Uganda, Nagongera, Tororo, S F]	Uganda	Nagongera, Tororo	F	S	wt
AC0091-Ca	AC0091-C	UGgam	AC0091-Ca [Uganda, Nagongera, Tororo, S F]	Uganda	Nagongera, Tororo	F	S	wt
AC0091-Cb	AC0091-C	UGgam	AC0091-Cb [Uganda, Nagongera, Tororo, S F]	Uganda	Nagongera, Tororo	F	S	wt
AC0092-Ca	AC0092-C	UGgam	AC0092-Ca [Uganda, Nagongera, Tororo, S F]	Uganda	Nagongera, Tororo	F	S	wt
AC0092-Cb	AC0092-C	UGgam	AC0092-Cb [Uganda, Nagongera, Tororo, S F]	Uganda	Nagongera, Tororo	F	S	wt
AC0093-Ca	AC0093-C	UGgam	AC0093-Ca [Uganda, Nagongera, Tororo, S F]	Uganda	Nagongera, Tororo	F	S	wt
AC0093-Cb	AC0093-C	UGgam	AC0093-Cb [Uganda, Nagongera, Tororo, S F]	Uganda	Nagongera, Tororo	F	S	wt
AC0094-Ca	AC0094-C	UGgam	AC0094-Ca [Uganda, Nagongera, Tororo, S F]	Uganda	Nagongera, Tororo	F	S	wt
AC0094-Cb	AC0094-C	UGgam	AC0094-Cb [Uganda, Nagongera, Tororo, S F]	Uganda	Nagongera, Tororo	F	S	wt
AC0095-Ca	AC0095-C	UGgam	AC0095-Ca [Uganda, Nagongera, Tororo, S F]	Uganda	Nagongera, Tororo	F	S	wt
AC0095-Cb	AC0095-C	UGgam	AC0095-Cb [Uganda, Nagongera, Tororo, S F]	Uganda	Nagongera, Tororo	F	S	wt
AC0096-Ca	AC0096-C	UGgam	AC0096-Ca [Uganda, Nagongera, Tororo, S F]	Uganda	Nagongera, Tororo	F	S	wt
AC0096-Cb	AC0096-C	UGgam	AC0096-Cb [Uganda, Nagongera, Tororo, S F]	Uganda	Nagongera, Tororo	F	S	wt
AC0097-Ca	AC0097-C	UGgam	AC0097-Ca [Uganda, Nagongera, Tororo, S F]	Uganda	Nagongera, Tororo	F	S	wt
AC0097-Cb	AC0097-C	UGgam	AC0097-Cb [Uganda, Nagongera, Tororo, S F]	Uganda	Nagongera, Tororo	F	S	wt
AC0098-Ca	AC0098-C	UGgam	AC0098-Ca [Uganda, Nagongera, Tororo, S F]	Uganda	Nagongera, Tororo	F	S	wt
AC0098-Cb	AC0098-C	UGgam	AC0098-Cb [Uganda, Nagongera, Tororo, S F]	Uganda	Nagongera, Tororo	F	S	wt
AC0099-Ca	AC0099-C	UGgam	AC0099-Ca [Uganda, Nagongera, Tororo, S F]	Uganda	Nagongera, Tororo	F	S	wt
AC0099-Cb	AC0099-C	UGgam	AC0099-Cb [Uganda, Nagongera, Tororo, S F]	Uganda	Nagongera, Tororo	F	S	wt
AC0100-Ca	AC0100-C	UGgam	AC0100-Ca [Uganda, Nagongera, Tororo, S F]	Uganda	Nagongera, Tororo	F	S	wt
AC0100-Cb	AC0100-C	UGgam	AC0100-Cb [Uganda, Nagongera, Tororo, S F]	Uganda	Nagongera, Tororo	F	S	wt
AC0101-Ca	AC0101-C	UGgam	AC0101-Ca [Uganda, Nagongera, Tororo, S F]	Uganda	Nagongera, Tororo	F	S	wt
AC0101-Cb	AC0101-C	UGgam	AC0101-Cb [Uganda, Nagongera, Tororo, S F]	Uganda	Nagongera, Tororo	F	S	wt
AC0102-Ca	AC0102-C	UGgam	AC0102-Ca [Uganda, Nagongera, Tororo, S F]	Uganda	Nagongera, Tororo	F	S	wt
AC0102-Cb	AC0102-C	UGgam	AC0102-Cb [Uganda, Nagongera, Tororo, S F]	Uganda	Nagongera, Tororo	F	S	wt
AC0103-Ca	AC0103-C	UGgam	AC0103-Ca [Uganda, Nagongera, Tororo, S F]	Uganda	Nagongera, Tororo	F	S	wt
AC0103-Cb	AC0103-C	UGgam	AC0103-Cb [Uganda, Nagongera, Tororo, S F]	Uganda	Nagongera, Tororo	F	S	wt
AC0104-Ca	AC0104-C	UGgam	AC0104-Ca [Uganda, Nagongera, Tororo, S F]	Uganda	Nagongera, Tororo	F	S	wt
AC0104-Cb	AC0104-C	UGgam	AC0104-Cb [Uganda, Nagongera, Tororo, S F]	Uganda	Nagongera, Tororo	F	S	wt
AC0105-Ca	AC0105-C	UGgam	AC0105-Ca [Uganda, Nagongera, Tororo, S F]	Uganda	Nagongera, Tororo	F	S	wt
AC0105-Cb	AC0105-C	UGgam	AC0105-Cb [Uganda, Nagongera, Tororo, S F]	Uganda	Nagongera, Tororo	F	S	C4
AC0106-Ca	AC0106-C	UGgam	AC0106-Ca [Uganda, Nagongera, Tororo, S F]	Uganda	Nagongera, Tororo	F	S	wt
AC0106-Cb	AC0106-C	UGgam	AC0106-Cb [Uganda, Nagongera, Tororo, S F]	Uganda	Nagongera, Tororo	F	S	wt
AC0107-Ca	AC0107-C	UGgam	AC0107-Ca [Uganda, Nagongera, Tororo, S F]	Uganda	Nagongera, Tororo	F	S	wt
AC0107-Cb	AC0107-C	UGgam	AC0107-Cb [Uganda, Nagongera, Tororo, S F]	Uganda	Nagongera, Tororo	F	S	wt
AC0108-Ca	AC0108-C	UGgam	AC0108-Ca [Uganda, Nagongera, Tororo, S F]	Uganda	Nagongera, Tororo	F	S	wt
AC0108-Cb	AC0108-C	UGgam	AC0108-Cb [Uganda, Nagongera, Tororo, S F]	Uganda	Nagongera, Tororo	F	S	wt
AC0109-Ca	AC0109-C	UGgam	AC0109-Ca [Uganda, Nagongera, Tororo, S F]	Uganda	Nagongera, Tororo	F	S	wt
AC0109-Cb	AC0109-C	UGgam	AC0109-Cb [Uganda, Nagongera, Tororo, S F]	Uganda	Nagongera, Tororo	F	S	C3
AC0110-Ca	AC0110-C	UGgam	AC0110-Ca [Uganda, Nagongera, Tororo, S F]	Uganda	Nagongera, Tororo	F	S	wt
AC0110-Cb	AC0110-C	UGgam	AC0110-Cb [Uganda, Nagongera, Tororo, S F]	Uganda	Nagongera, Tororo	F	S	wt
AC0111-Ca	AC0111-C	UGgam	AC0111-Ca [Uganda, Nagongera, Tororo, S F]	Uganda	Nagongera, Tororo	F	S	C4
AC0111-Cb	AC0111-C	UGgam	AC0111-Cb [Uganda, Nagongera, Tororo, S F]	Uganda	Nagongera, Tororo	F	S	wt
AC0112-Ca	AC0112-C	UGgam	AC0112-Ca [Uganda, Nagongera, Tororo, S F]	Uganda	Nagongera, Tororo	F	S	wt
AC0112-Cb	AC0112-C	UGgam	AC0112-Cb [Uganda, Nagongera, Tororo, S F]	Uganda	Nagongera, Tororo	F	S	C3
AC0113-Ca	AC0113-C	UGgam	AC0113-Ca [Uganda, Nagongera, Tororo, S F]	Uganda	Nagongera, Tororo	F	S	wt
AC0113-Cb	AC0113-C	UGgam	AC0113-Cb [Uganda, Nagongera, Tororo, S F]	Uganda	Nagongera, Tororo	F	S	wt
AC0114-Ca	AC0114-C	UGgam	AC0114-Ca [Uganda, Nagongera, Tororo, S F]	Uganda	Nagongera, Tororo	F	S	wt
AC0114-Cb	AC0114-C	UGgam	AC0114-Cb [Uganda, Nagongera, Tororo, S F]	Uganda	Nagongera, Tororo	F	S	wt
AC0115-Ca	AC0115-C	UGgam	AC0115-Ca [Uganda, Nagongera, Tororo, S F]	Uganda	Nagongera, Tororo	F	S	wt
AC0115-Cb	AC0115-C	UGgam	AC0115-Cb [Uganda, Nagongera, Tororo, S F]	Uganda	Nagongera, Tororo	F	S	wt
AC0116-Ca	AC0116-C	UGgam	AC0116-Ca [Uganda, Nagongera, Tororo, S F]	Uganda	Nagongera, Tororo	F	S	wt
AC0116-Cb	AC0116-C	UGgam	AC0116-Cb [Uganda, Nagongera, Tororo, S F]	Uganda	Nagongera, Tororo	F	S	wt
AC0117-Ca	AC0117-C	UGgam	AC0117-Ca [Uganda, Nagongera, Tororo, S F]	Uganda	Nagongera, Tororo	F	S	wt
AC0117-Cb	AC0117-C	UGgam	AC0117-Cb [Uganda, Nagongera, Tororo, S F]	Uganda	Nagongera, Tororo	F	S	wt
AC0118-Ca	AC0118-C	UGgam	AC0118-Ca [Uganda, Nagongera, Tororo, S F]	Uganda	Nagongera, Tororo	F	S	wt
AC0118-Cb	AC0118-C	UGgam	AC0118-Cb [Uganda, Nagongera, Tororo, S F]	Uganda	Nagongera, Tororo	F	S	wt
AC0119-Ca	AC0119-C	UGgam	AC0119-Ca [Uganda, Nagongera, Tororo, S F]	Uganda	Nagongera, Tororo	F	S	wt
AC0119-Cb	AC0119-C	UGgam	AC0119-Cb [Uganda, Nagongera, Tororo, S F]	Uganda	Nagongera, Tororo	F	S	wt
AC0120-Ca	AC0120-C	UGgam	AC0120-Ca [Uganda, Nagongera, Tororo, S F]	Uganda	Nagongera, Tororo	F	S	wt
AC0120-Cb	AC0120-C	UGgam	AC0120-Cb [Uganda, Nagongera, Tororo, S F]	Uganda	Nagongera, Tororo	F	S	wt
AC0121-Ca	AC0121-C	UGgam	AC0121-Ca [Uganda, Nagongera, Tororo, S F]	Uganda	Nagongera, Tororo	F	S	wt
AC0121-Cb	AC0121-C	UGgam	AC0121-Cb [Uganda, Nagongera, Tororo, S F]	Uganda	Nagongera, Tororo	F	S	wt
AC0122-Ca	AC0122-C	UGgam	AC0122-Ca [Uganda, Nagongera, Tororo, S F]	Uganda	Nagongera, Tororo	F	S	wt
AC0122-Cb	AC0122-C	UGgam	AC0122-Cb [Uganda, Nagongera, Tororo, S F]	Uganda	Nagongera, Tororo	F	S	C4
AC0123-Ca	AC0123-C	UGgam	AC0123-Ca [Uganda, Nagongera, Tororo, S F]	Uganda	Nagongera, Tororo	F	S	C4
AC0123-Cb	AC0123-C	UGgam	AC0123-Cb [Uganda, Nagongera, Tororo, S F]	Uganda	Nagongera, Tororo	F	S	wt
AC0124-Ca	AC0124-C	UGgam	AC0124-Ca [Uganda, Nagongera, Tororo, S F]	Uganda	Nagongera, Tororo	F	S	wt
AC0124-Cb	AC0124-C	UGgam	AC0124-Cb [Uganda, Nagongera, Tororo, S F]	Uganda	Nagongera, Tororo	F	S	wt
AC0125-Ca	AC0125-C	UGgam	AC0125-Ca [Uganda, Nagongera, Tororo, S F]	Uganda	Nagongera, Tororo	F	S	wt
AC0125-Cb	AC0125-C	UGgam	AC0125-Cb [Uganda, Nagongera, Tororo, S F]	Uganda	Nagongera, Tororo	F	S	wt
AC0126-Ca	AC0126-C	UGgam	AC0126-Ca [Uganda, Nagongera, Tororo, S F]	Uganda	Nagongera, Tororo	F	S	wt
AC0126-Cb	AC0126-C	UGgam	AC0126-Cb [Uganda, Nagongera, Tororo, S F]	Uganda	Nagongera, Tororo	F	S	wt
AC0127-Ca	AC0127-C	UGgam	AC0127-Ca [Uganda, Nagongera, Tororo, S F]	Uganda	Nagongera, Tororo	F	S	C3
AC0127-Cb	AC0127-C	UGgam	AC0127-Cb [Uganda, Nagongera, Tororo, S F]	Uganda	Nagongera, Tororo	F	S	wt
AC0128-Ca	AC0128-C	UGgam	AC0128-Ca [Uganda, Nagongera, Tororo, S F]	Uganda	Nagongera, Tororo	F	S	wt
AC0128-Cb	AC0128-C	UGgam	AC0128-Cb [Uganda, Nagongera, Tororo, S F]	Uganda	Nagongera, Tororo	F	S	wt
AC0129-Ca	AC0129-C	UGgam	AC0129-Ca [Uganda, Nagongera, Tororo, S F]	Uganda	Nagongera, Tororo	F	S	wt
AC0129-Cb	AC0129-C	UGgam	AC0129-Cb [Uganda, Nagongera, Tororo, S F]	Uganda	Nagongera, Tororo	F	S	wt
AC0130-Ca	AC0130-C	UGgam	AC0130-Ca [Uganda, Nagongera, Tororo, S F]	Uganda	Nagongera, Tororo	F	S	wt
AC0130-Cb	AC0130-C	UGgam	AC0130-Cb [Uganda, Nagongera, Tororo, S F]	Uganda	Nagongera, Tororo	F	S	wt
AC0131-Ca	AC0131-C	UGgam	AC0131-Ca [Uganda, Nagongera, Tororo, S F]	Uganda	Nagongera, Tororo	F	S	wt
AC0131-Cb	AC0131-C	UGgam	AC0131-Cb [Uganda, Nagongera, Tororo, S F]	Uganda	Nagongera, Tororo	F	S	wt
AC0132-Ca	AC0132-C	UGgam	AC0132-Ca [Uganda, Nagongera, Tororo, S F]	Uganda	Nagongera, Tororo	F	S	wt
AC0132-Cb	AC0132-C	UGgam	AC0132-Cb [Uganda, Nagongera, Tororo, S F]	Uganda	Nagongera, Tororo	F	S	wt
AC0133-Ca	AC0133-C	UGgam	AC0133-Ca [Uganda, Nagongera, Tororo, S F]	Uganda	Nagongera, Tororo	F	S	wt
AC0133-Cb	AC0133-C	UGgam	AC0133-Cb [Uganda, Nagongera, Tororo, S F]	Uganda	Nagongera, Tororo	F	S	wt
AC0134-Ca	AC0134-C	UGgam	AC0134-Ca [Uganda, Nagongera, Tororo, S F]	Uganda	Nagongera, Tororo	F	S	wt
AC0134-Cb	AC0134-C	UGgam	AC0134-Cb [Uganda, Nagongera, Tororo, S F]	Uganda	Nagongera, Tororo	F	S	wt
AC0135-Ca	AC0135-C	UGgam	AC0135-Ca [Uganda, Nagongera, Tororo, S F]	Uganda	Nagongera, Tororo	F	S	wt
AC0135-Cb	AC0135-C	UGgam	AC0135-Cb [Uganda, Nagongera, Tororo, S F]	Uganda	Nagongera, Tororo	F	S	wt
AC0136-Ca	AC0136-C	UGgam	AC0136-Ca [Uganda, Nagongera, Tororo, S F]	Uganda	Nagongera, Tororo	F	S	wt
AC0136-Cb	AC0136-C	UGgam	AC0136-Cb [Uganda, Nagongera, Tororo, S F]	Uganda	Nagongera, Tororo	F	S	wt
AC0137-Ca	AC0137-C	UGgam	AC0137-Ca [Uganda, Nagongera, Tororo, S F]	Uganda	Nagongera, Tororo	F	S	C4
AC0137-Cb	AC0137-C	UGgam	AC0137-Cb [Uganda, Nagongera, Tororo, S F]	Uganda	Nagongera, Tororo	F	S	wt
AC0138-Ca	AC0138-C	UGgam	AC0138-Ca [Uganda, Nagongera, Tororo, S F]	Uganda	Nagongera, Tororo	F	S	wt
AC0138-Cb	AC0138-C	UGgam	AC0138-Cb [Uganda, Nagongera, Tororo, S F]	Uganda	Nagongera, Tororo	F	S	wt
AC0139-Ca	AC0139-C	UGgam	AC0139-Ca [Uganda, Nagongera, Tororo, S F]	Uganda	Nagongera, Tororo	F	S	wt
AC0139-Cb	AC0139-C	UGgam	AC0139-Cb [Uganda, Nagongera, Tororo, S F]	Uganda	Nagongera, Tororo	F	S	wt
AC0140-Ca	AC0140-C	UGgam	AC0140-Ca [Uganda, Nagongera, Tororo, S F]	Uganda	Nagongera, Tororo	F	S	wt
AC0140-Cb	AC0140-C	UGgam	AC0140-Cb [Uganda, Nagongera, Tororo, S F]	Uganda	Nagongera, Tororo	F	S	wt
AC0141-Ca	AC0141-C	UGgam	AC0141-Ca [Uganda, Nagongera, Tororo, S F]	Uganda	Nagongera, Tororo	F	S	wt
AC0141-Cb	AC0141-C	UGgam	AC0141-Cb [Uganda, Nagongera, Tororo, S F]	Uganda	Nagongera, Tororo	F	S	wt
AC0142-Ca	AC0142-C	UGgam	AC0142-Ca [Uganda, Nagongera, Tororo, S F]	Uganda	Nagongera, Tororo	F	S	wt
AC0142-Cb	AC0142-C	UGgam	AC0142-Cb [Uganda, Nagongera, Tororo, S F]	Uganda	Nagongera, Tororo	F	S	wt
AC0143-Ca	AC0143-C	UGgam	AC0143-Ca [Uganda, Nagongera, Tororo, S F]	Uganda	Nagongera, Tororo	F	S	wt
AC0143-Cb	AC0143-C	UGgam	AC0143-Cb [Uganda, Nagongera, Tororo, S F]	Uganda	Nagongera, Tororo	F	S	wt
AC0144-Ca	AC0144-C	UGgam	AC0144-Ca [Uganda, Nagongera, Tororo, S F]	Uganda	Nagongera, Tororo	F	S	wt
AC0144-Cb	AC0144-C	UGgam	AC0144-Cb [Uganda, Nagongera, Tororo, S F]	Uganda	Nagongera, Tororo	F	S	wt
AC0145-Ca	AC0145-C	UGgam	AC0145-Ca [Uganda, Nagongera, Tororo, S F]	Uganda	Nagongera, Tororo	F	S	wt
AC0145-Cb	AC0145-C	UGgam	AC0145-Cb [Uganda, Nagongera, Tororo, S F]	Uganda	Nagongera, Tororo	F	S	wt
AC0146-Ca	AC0146-C	UGgam	AC0146-Ca [Uganda, Nagongera, Tororo, S F]	Uganda	Nagongera, Tororo	F	S	wt
AC0146-Cb	AC0146-C	UGgam	AC0146-Cb [Uganda, Nagongera, Tororo, S F]	Uganda	Nagongera, Tororo	F	S	wt
AC0147-Ca	AC0147-C	UGgam	AC0147-Ca [Uganda, Nagongera, Tororo, S F]	Uganda	Nagongera, Tororo	F	S	wt
AC0147-Cb	AC0147-C	UGgam	AC0147-Cb [Uganda, Nagongera, Tororo, S F]	Uganda	Nagongera, Tororo	F	S	wt
AC0148-Ca	AC0148-C	UGgam	AC0148-Ca [Uganda, Nagongera, Tororo, S F]	Uganda	Nagongera, Tororo	F	S	wt
AC0148-Cb	AC0148-C	UGgam	AC0148-Cb [Uganda, Nagongera, Tororo, S F]	Uganda	Nagongera, Tororo	F	S	wt
AC0149-Ca	AC0149-C	UGgam	AC0149-Ca [Uganda, Nagongera, Tororo, S F]	Uganda	Nagongera, Tororo	F	S	wt
AC0149-Cb	AC0149-C	UGgam	AC0149-Cb [Uganda, Nagongera, Tororo, S F]	Uganda	Nagongera, Tororo	F	S	wt
AC0150-Ca	AC0150-C	UGgam	AC0150-Ca [Uganda, Nagongera, Tororo, S F]	Uganda	Nagongera, Tororo	F	S	wt
AC0150-Cb	AC0150-C	UGgam	AC0150-Cb [Uganda, Nagongera, Tororo, S F]	Uganda	Nagongera, Tororo	F	S	wt
AC0151-Ca	AC0151-C	UGgam	AC0151-Ca [Uganda, Nagongera, Tororo, S F]	Uganda	Nagongera, Tororo	F	S	wt
AC0151-Cb	AC0151-C	UGgam	AC0151-Cb [Uganda, Nagongera, Tororo, S F]	Uganda	Nagongera, Tororo	F	S	wt
AC0152-Ca	AC0152-C	UGgam	AC0152-Ca [Uganda, Nagongera, Tororo, S F]	Uganda	Nagongera, Tororo	F	S	wt
AC0152-Cb	AC0152-C	UGgam	AC0152-Cb [Uganda, Nagongera, Tororo, S F]	Uganda	Nagongera, Tororo	F	S	wt
AC0153-Ca	AC0153-C	UGgam	AC0153-Ca [Uganda, Nagongera, Tororo, S F]	Uganda	Nagongera, Tororo	F	S	wt
AC0153-Cb	AC0153-C	UGgam	AC0153-Cb [Uganda, Nagongera, Tororo, S F]	Uganda	Nagongera, Tororo	F	S	wt
AC0154-Ca	AC0154-C	UGgam	AC0154-Ca [Uganda, Nagongera, Tororo, S F]	Uganda	Nagongera, Tororo	F	S	wt
AC0154-Cb	AC0154-C	UGgam	AC0154-Cb [Uganda, Nagongera, Tororo, S F]	Uganda	Nagongera, Tororo	F	S	wt
AC0155-Ca	AC0155-C	UGgam	AC0155-Ca [Uganda, Nagongera, Tororo, S F]	Uganda	Nagongera, Tororo	F	S	wt
AC0155-Cb	AC0155-C	UGgam	AC0155-Cb [Uganda, Nagongera, Tororo, S F]	Uganda	Nagongera, Tororo	F	S	wt
AC0156-Ca	AC0156-C	UGgam	AC0156-Ca [Uganda, Nagongera, Tororo, S F]	Uganda	Nagongera, Tororo	F	S	wt
AC0156-Cb	AC0156-C	UGgam	AC0156-Cb [Uganda, Nagongera, Tororo, S F]	Uganda	Nagongera, Tororo	F	S	wt
AC0157-Ca	AC0157-C	UGgam	AC0157-Ca [Uganda, Nagongera, Tororo, S F]	Uganda	Nagongera, Tororo	F	S	wt
AC0157-Cb	AC0157-C	UGgam	AC0157-Cb [Uganda, Nagongera, Tororo, S F]	Uganda	Nagongera, Tororo	F	S	wt
AC0158-Ca	AC0158-C	UGgam	AC0158-Ca [Uganda, Nagongera, Tororo, S F]	Uganda	Nagongera, Tororo	F	S	wt
AC0158-Cb	AC0158-C	UGgam	AC0158-Cb [Uganda, Nagongera, Tororo, S F]	Uganda	Nagongera, Tororo	F	S	wt
AC0159-Ca	AC0159-C	UGgam	AC0159-Ca [Uganda, Nagongera, Tororo, S F]	Uganda	Nagongera, Tororo	F	S	wt
AC0159-Cb	AC0159-C	UGgam	AC0159-Cb [Uganda, Nagongera, Tororo, S F]	Uganda	Nagongera, Tororo	F	S	wt
AC0160-Ca	AC0160-C	UGgam	AC0160-Ca [Uganda, Nagongera, Tororo, S F]	Uganda	Nagongera, Tororo	F	S	wt
AC0160-Cb	AC0160-C	UGgam	AC0160-Cb [Uganda, Nagongera, Tororo, S F]	Uganda	Nagongera, Tororo	F	S	wt
AC0161-Ca	AC0161-C	UGgam	AC0161-Ca [Uganda, Nagongera, Tororo, S F]	Uganda	Nagongera, Tororo	F	S	wt
AC0161-Cb	AC0161-C	UGgam	AC0161-Cb [Uganda, Nagongera, Tororo, S F]	Uganda	Nagongera, Tororo	F	S	C3
AC0162-Ca	AC0162-C	UGgam	AC0162-Ca [Uganda, Nagongera, Tororo, S F]	Uganda	Nagongera, Tororo	F	S	wt
AC0162-Cb	AC0162-C	UGgam	AC0162-Cb [Uganda, Nagongera, Tororo, S F]	Uganda	Nagongera, Tororo	F	S	wt
AC0163-Ca	AC0163-C	UGgam	AC0163-Ca [Uganda, Nagongera, Tororo, S F]	Uganda	Nagongera, Tororo	F	S	wt
AC0163-Cb	AC0163-C	UGgam	AC0163-Cb [Uganda, Nagongera, Tororo, S F]	Uganda	Nagongera, Tororo	F	S	C1
AC0164-Ca	AC0164-C	UGgam	AC0164-Ca [Uganda, Nagongera, Tororo, S F]	Uganda	Nagongera, Tororo	F	S	wt
AC0164-Cb	AC0164-C	UGgam	AC0164-Cb [Uganda, Nagongera, Tororo, S F]	Uganda	Nagongera, Tororo	F	S	wt
AC0166-Ca	AC0166-C	UGgam	AC0166-Ca [Uganda, Nagongera, Tororo, S F]	Uganda	Nagongera, Tororo	F	S	wt
AC0166-Cb	AC0166-C	UGgam	AC0166-Cb [Uganda, Nagongera, Tororo, S F]	Uganda	Nagongera, Tororo	F	S	wt
AC0167-Ca	AC0167-C	UGgam	AC0167-Ca [Uganda, Nagongera, Tororo, S F]	Uganda	Nagongera, Tororo	F	S	wt
AC0167-Cb	AC0167-C	UGgam	AC0167-Cb [Uganda, Nagongera, Tororo, S F]	Uganda	Nagongera, Tororo	F	S	wt
AC0168-Ca	AC0168-C	UGgam	AC0168-Ca [Uganda, Nagongera, Tororo, S F]	Uganda	Nagongera, Tororo	F	S	wt
AC0168-Cb	AC0168-C	UGgam	AC0168-Cb [Uganda, Nagongera, Tororo, S F]	Uganda	Nagongera, Tororo	F	S	wt
AC0169-Ca	AC0169-C	UGgam	AC0169-Ca [Uganda, Nagongera, Tororo, S F]	Uganda	Nagongera, Tororo	F	S	wt
AC0169-Cb	AC0169-C	UGgam	AC0169-Cb [Uganda, Nagongera, Tororo, S F]	Uganda	Nagongera, Tororo	F	S	wt
AC0170-Ca	AC0170-C	UGgam	AC0170-Ca [Uganda, Nagongera, Tororo, S F]	Uganda	Nagongera, Tororo	F	S	wt
AC0170-Cb	AC0170-C	UGgam	AC0170-Cb [Uganda, Nagongera, Tororo, S F]	Uganda	Nagongera, Tororo	F	S	wt
AC0171-Ca	AC0171-C	UGgam	AC0171-Ca [Uganda, Nagongera, Tororo, S F]	Uganda	Nagongera, Tororo	F	S	wt
AC0171-Cb	AC0171-C	UGgam	AC0171-Cb [Uganda, Nagongera, Tororo, S F]	Uganda	Nagongera, Tororo	F	S	wt
AC0172-Ca	AC0172-C	UGgam	AC0172-Ca [Uganda, Nagongera, Tororo, S F]	Uganda	Nagongera, Tororo	F	S	wt
AC0172-Cb	AC0172-C	UGgam	AC0172-Cb [Uganda, Nagongera, Tororo, S F]	Uganda	Nagongera, Tororo	F	S	wt
AC0173-Ca	AC0173-C	UGgam	AC0173-Ca [Uganda, Nagongera, Tororo, S F]	Uganda	Nagongera, Tororo	F	S	wt
AC0173-Cb	AC0173-C	UGgam	AC0173-Cb [Uganda, Nagongera, Tororo, S F]	Uganda	Nagongera, Tororo	F	S	C4
AC0174-Ca	AC0174-C	UGgam	AC0174-Ca [Uganda, Nagongera, Tororo, S F]	Uganda	Nagongera, Tororo	F	S	wt
AC0174-Cb	AC0174-C	UGgam	AC0174-Cb [Uganda, Nagongera, Tororo, S F]	Uganda	Nagongera, Tororo	F	S	wt
AC0176-Ca	AC0176-C	UGgam	AC0176-Ca [Uganda, Nagongera, Tororo, S F]	Uganda	Nagongera, Tororo	F	S	wt
AC0176-Cb	AC0176-C	UGgam	AC0176-Cb [Uganda, Nagongera, Tororo, S F]	Uganda	Nagongera, Tororo	F	S	wt
AC0177-Ca	AC0177-C	UGgam	AC0177-Ca [Uganda, Nagongera, Tororo, S F]	Uganda	Nagongera, Tororo	F	S	wt
AC0177-Cb	AC0177-C	UGgam	AC0177-Cb [Uganda, Nagongera, Tororo, S F]	Uganda	Nagongera, Tororo	F	S	wt
AC0178-Ca	AC0178-C	UGgam	AC0178-Ca [Uganda, Nagongera, Tororo, S F]	Uganda	Nagongera, Tororo	F	S	wt
AC0178-Cb	AC0178-C	UGgam	AC0178-Cb [Uganda, Nagongera, Tororo, S F]	Uganda	Nagongera, Tororo	F	S	wt
AC0179-Ca	AC0179-C	UGgam	AC0179-Ca [Uganda, Nagongera, Tororo, S F]	Uganda	Nagongera, Tororo	F	S	wt
AC0179-Cb	AC0179-C	UGgam	AC0179-Cb [Uganda, Nagongera, Tororo, S F]	Uganda	Nagongera, Tororo	F	S	wt
AC0180-Ca	AC0180-C	UGgam	AC0180-Ca [Uganda, Nagongera, Tororo, S F]	Uganda	Nagongera, Tororo	F	S	wt
AC0180-Cb	AC0180-C	UGgam	AC0180-Cb [Uganda, Nagongera, Tororo, S F]	Uganda	Nagongera, Tororo	F	S	wt
AC0181-Ca	AC0181-C	UGgam	AC0181-Ca [Uganda, Nagongera, Tororo, S F]	Uganda	Nagongera, Tororo	F	S	wt
AC0181-Cb	AC0181-C	UGgam	AC0181-Cb [Uganda, Nagongera, Tororo, S F]	Uganda	Nagongera, Tororo	F	S	wt
AC0182-Ca	AC0182-C	UGgam	AC0182-Ca [Uganda, Nagongera, Tororo, S F]	Uganda	Nagongera, Tororo	F	S	wt
AC0182-Cb	AC0182-C	UGgam	AC0182-Cb [Uganda, Nagongera, Tororo, S F]	Uganda	Nagongera, Tororo	F	S	wt
AC0183-Ca	AC0183-C	UGgam	AC0183-Ca [Uganda, Nagongera, Tororo, S F]	Uganda	Nagongera, Tororo	F	S	wt
AC0183-Cb	AC0183-C	UGgam	AC0183-Cb [Uganda, Nagongera, Tororo, S F]	Uganda	Nagongera, Tororo	F	S	C4
AC0184-Ca	AC0184-C	UGgam	AC0184-Ca [Uganda, Nagongera, Tororo, S F]	Uganda	Nagongera, Tororo	F	S	wt
AC0184-Cb	AC0184-C	UGgam	AC0184-Cb [Uganda, Nagongera, Tororo, S F]	Uganda	Nagongera, Tororo	F	S	C4
AC0185-Ca	AC0185-C	UGgam	AC0185-Ca [Uganda, Nagongera, Tororo, S F]	Uganda	Nagongera, Tororo	F	S	wt
AC0185-Cb	AC0185-C	UGgam	AC0185-Cb [Uganda, Nagongera, Tororo, S F]	Uganda	Nagongera, Tororo	F	S	wt
AC0186-Ca	AC0186-C	UGgam	AC0186-Ca [Uganda, Nagongera, Tororo, S F]	Uganda	Nagongera, Tororo	F	S	wt
AC0186-Cb	AC0186-C	UGgam	AC0186-Cb [Uganda, Nagongera, Tororo, S F]	Uganda	Nagongera, Tororo	F	S	C1
AC0187-Ca	AC0187-C	UGgam	AC0187-Ca [Uganda, Nagongera, Tororo, S F]	Uganda	Nagongera, Tororo	F	S	wt
AC0187-Cb	AC0187-C	UGgam	AC0187-Cb [Uganda, Nagongera, Tororo, S F]	Uganda	Nagongera, Tororo	F	S	wt
AC0188-Ca	AC0188-C	UGgam	AC0188-Ca [Uganda, Nagongera, Tororo, S F]	Uganda	Nagongera, Tororo	F	S	wt
AC0188-Cb	AC0188-C	UGgam	AC0188-Cb [Uganda, Nagongera, Tororo, S F]	Uganda	Nagongera, Tororo	F	S	wt
AC0189-Ca	AC0189-C	UGgam	AC0189-Ca [Uganda, Nagongera, Tororo, S F]	Uganda	Nagongera, Tororo	F	S	wt
AC0189-Cb	AC0189-C	UGgam	AC0189-Cb [Uganda, Nagongera, Tororo, S F]	Uganda	Nagongera, Tororo	F	S	wt
AC0190-Ca	AC0190-C	UGgam	AC0190-Ca [Uganda, Nagongera, Tororo, S F]	Uganda	Nagongera, Tororo	F	S	wt
AC0190-Cb	AC0190-C	UGgam	AC0190-Cb [Uganda, Nagongera, Tororo, S F]	Uganda	Nagongera, Tororo	F	S	wt
AC0191-Ca	AC0191-C	UGgam	AC0191-Ca [Uganda, Nagongera, Tororo, S F]	Uganda	Nagongera, Tororo	F	S	wt
AC0191-Cb	AC0191-C	UGgam	AC0191-Cb [Uganda, Nagongera, Tororo, S F]	Uganda	Nagongera, Tororo	F	S	wt
AC0192-Ca	AC0192-C	UGgam	AC0192-Ca [Uganda, Nagongera, Tororo, S F]	Uganda	Nagongera, Tororo	F	S	C4
AC0192-Cb	AC0192-C	UGgam	AC0192-Cb [Uganda, Nagongera, Tororo, S F]	Uganda	Nagongera, Tororo	F	S	wt
AC0193-Ca	AC0193-C	UGgam	AC0193-Ca [Uganda, Nagongera, Tororo, S F]	Uganda	Nagongera, Tororo	F	S	wt
AC0193-Cb	AC0193-C	UGgam	AC0193-Cb [Uganda, Nagongera, Tororo, S F]	Uganda	Nagongera, Tororo	F	S	C4
AC0194-Ca	AC0194-C	UGgam	AC0194-Ca [Uganda, Nagongera, Tororo, S F]	Uganda	Nagongera, Tororo	F	S	wt
AC0194-Cb	AC0194-C	UGgam	AC0194-Cb [Uganda, Nagongera, Tororo, S F]	Uganda	Nagongera, Tororo	F	S	wt
AC0195-Ca	AC0195-C	UGgam	AC0195-Ca [Uganda, Nagongera, Tororo, S F]	Uganda	Nagongera, Tororo	F	S	wt
AC0195-Cb	AC0195-C	UGgam	AC0195-Cb [Uganda, Nagongera, Tororo, S F]	Uganda	Nagongera, Tororo	F	S	wt
AC0196-Ca	AC0196-C	UGgam	AC0196-Ca [Uganda, Nagongera, Tororo, S F]	Uganda	Nagongera, Tororo	F	S	wt
AC0196-Cb	AC0196-C	UGgam	AC0196-Cb [Uganda, Nagongera, Tororo, S F]	Uganda	Nagongera, Tororo	F	S	C4
AC0197-Ca	AC0197-C	UGgam	AC0197-Ca [Uganda, Nagongera, Tororo, S F]	Uganda	Nagongera, Tororo	F	S	wt
AC0197-Cb	AC0197-C	UGgam	AC0197-Cb [Uganda, Nagongera, Tororo, S F]	Uganda	Nagongera, Tororo	F	S	C4
AC0199-Ca	AC0199-C	UGgam	AC0199-Ca [Uganda, Nagongera, Tororo, S F]	Uganda	Nagongera, Tororo	F	S	wt
AC0199-Cb	AC0199-C	UGgam	AC0199-Cb [Uganda, Nagongera, Tororo, S F]	Uganda	Nagongera, Tororo	F	S	wt
AC0200-Ca	AC0200-C	UGgam	AC0200-Ca [Uganda, Nagongera, Tororo, S F]	Uganda	Nagongera, Tororo	F	S	wt
AC0200-Cb	AC0200-C	UGgam	AC0200-Cb [Uganda, Nagongera, Tororo, S F]	Uganda	Nagongera, Tororo	F	S	wt
AC0201-Ca	AC0201-C	UGgam	AC0201-Ca [Uganda, Nagongera, Tororo, S F]	Uganda	Nagongera, Tororo	F	S	C4
AC0201-Cb	AC0201-C	UGgam	AC0201-Cb [Uganda, Nagongera, Tororo, S F]	Uganda	Nagongera, Tororo	F	S	wt
AC0202-Ca	AC0202-C	UGgam	AC0202-Ca [Uganda, Nagongera, Tororo, S F]	Uganda	Nagongera, Tororo	F	S	wt
AC0202-Cb	AC0202-C	UGgam	AC0202-Cb [Uganda, Nagongera, Tororo, S F]	Uganda	Nagongera, Tororo	F	S	wt
AC0203-Ca	AC0203-C	UGgam	AC0203-Ca [Uganda, Nagongera, Tororo, S F]	Uganda	Nagongera, Tororo	F	S	C4
AC0203-Cb	AC0203-C	UGgam	AC0203-Cb [Uganda, Nagongera, Tororo, S F]	Uganda	Nagongera, Tororo	F	S	wt
AG0082-Ca	AG0082-C	GM	AG0082-Ca [Gambia, The, SIB, nan F]	Gambia, The	SIB	F		wt
AG0082-Cb	AG0082-C	GM	AG0082-Cb [Gambia, The, SIB, nan F]	Gambia, The	SIB	F		wt
AG0085-Ca	AG0085-C	GM	AG0085-Ca [Gambia, The, SIB, nan F]	Gambia, The	SIB	F		wt
AG0085-Cb	AG0085-C	GM	AG0085-Cb [Gambia, The, SIB, nan F]	Gambia, The	SIB	F		C5
AG0089-Ca	AG0089-C	GM	AG0089-Ca [Gambia, The, SIB, nan F]	Gambia, The	SIB	F		wt
AG0089-Cb	AG0089-C	GM	AG0089-Cb [Gambia, The, SIB, nan F]	Gambia, The	SIB	F		wt
AG0096-Ca	AG0096-C	GM	AG0096-Ca [Gambia, The, SIB, nan F]	Gambia, The	SIB	F		wt
AG0096-Cb	AG0096-C	GM	AG0096-Cb [Gambia, The, SIB, nan F]	Gambia, The	SIB	F		wt
AG0097-Ca	AG0097-C	GM	AG0097-Ca [Gambia, The, SIB, nan F]	Gambia, The	SIB	F		wt
AG0097-Cb	AG0097-C	GM	AG0097-Cb [Gambia, The, SIB, nan F]	Gambia, The	SIB	F		wt
AG0098-Ca	AG0098-C	GM	AG0098-Ca [Gambia, The, SIB, nan F]	Gambia, The	SIB	F		wt
AG0098-Cb	AG0098-C	GM	AG0098-Cb [Gambia, The, SIB, nan F]	Gambia, The	SIB	F		wt
AG0100-Ca	AG0100-C	GM	AG0100-Ca [Gambia, The, SIB, nan F]	Gambia, The	SIB	F		wt
AG0100-Cb	AG0100-C	GM	AG0100-Cb [Gambia, The, SIB, nan F]	Gambia, The	SIB	F		wt
AG0102-Ca	AG0102-C	GM	AG0102-Ca [Gambia, The, SIB, nan F]	Gambia, The	SIB	F		wt
AG0102-Cb	AG0102-C	GM	AG0102-Cb [Gambia, The, SIB, nan F]	Gambia, The	SIB	F		wt
AG0104-Ca	AG0104-C	GM	AG0104-Ca [Gambia, The, MSN, nan F]	Gambia, The	MSN	F		wt
AG0104-Cb	AG0104-C	GM	AG0104-Cb [Gambia, The, MSN, nan F]	Gambia, The	MSN	F		wt
AG0106-Ca	AG0106-C	GM	AG0106-Ca [Gambia, The, MSN, nan F]	Gambia, The	MSN	F		wt
AG0106-Cb	AG0106-C	GM	AG0106-Cb [Gambia, The, MSN, nan F]	Gambia, The	MSN	F		wt
AG0108-Ca	AG0108-C	GM	AG0108-Ca [Gambia, The, MSN, nan F]	Gambia, The	MSN	F		wt
AG0108-Cb	AG0108-C	GM	AG0108-Cb [Gambia, The, MSN, nan F]	Gambia, The	MSN	F		wt
AG0109-Ca	AG0109-C	GM	AG0109-Ca [Gambia, The, MSN, nan F]	Gambia, The	MSN	F		wt
AG0109-Cb	AG0109-C	GM	AG0109-Cb [Gambia, The, MSN, nan F]	Gambia, The	MSN	F		wt
AG0111-Ca	AG0111-C	GM	AG0111-Ca [Gambia, The, MSN, nan F]	Gambia, The	MSN	F		wt
AG0111-Cb	AG0111-C	GM	AG0111-Cb [Gambia, The, MSN, nan F]	Gambia, The	MSN	F		wt
AG0118-Ca	AG0118-C	GM	AG0118-Ca [Gambia, The, MSN, nan F]	Gambia, The	MSN	F		C5
AG0118-Cb	AG0118-C	GM	AG0118-Cb [Gambia, The, MSN, nan F]	Gambia, The	MSN	F		wt
AG0120-Ca	AG0120-C	GM	AG0120-Ca [Gambia, The, MSN, nan F]	Gambia, The	MSN	F		wt
AG0120-Cb	AG0120-C	GM	AG0120-Cb [Gambia, The, MSN, nan F]	Gambia, The	MSN	F		wt
AG0121-Ca	AG0121-C	GM	AG0121-Ca [Gambia, The, MSN, nan F]	Gambia, The	MSN	F		wt
AG0121-Cb	AG0121-C	GM	AG0121-Cb [Gambia, The, MSN, nan F]	Gambia, The	MSN	F		wt
AG0123-Ca	AG0123-C	GM	AG0123-Ca [Gambia, The, MSN, nan F]	Gambia, The	MSN	F		wt
AG0123-Cb	AG0123-C	GM	AG0123-Cb [Gambia, The, MSN, nan F]	Gambia, The	MSN	F		C5
AG0125-Ca	AG0125-C	GM	AG0125-Ca [Gambia, The, KSK, nan F]	Gambia, The	KSK	F		wt
AG0125-Cb	AG0125-C	GM	AG0125-Cb [Gambia, The, KSK, nan F]	Gambia, The	KSK	F		wt
AG0126-Ca	AG0126-C	GM	AG0126-Ca [Gambia, The, KSK, nan F]	Gambia, The	KSK	F		wt
AG0126-Cb	AG0126-C	GM	AG0126-Cb [Gambia, The, KSK, nan F]	Gambia, The	KSK	F		wt
AG0127-Ca	AG0127-C	GM	AG0127-Ca [Gambia, The, KSK, nan F]	Gambia, The	KSK	F		wt
AG0127-Cb	AG0127-C	GM	AG0127-Cb [Gambia, The, KSK, nan F]	Gambia, The	KSK	F		wt
AG0128-Ca	AG0128-C	GM	AG0128-Ca [Gambia, The, SIB, nan F]	Gambia, The	SIB	F		C5
AG0128-Cb	AG0128-C	GM	AG0128-Cb [Gambia, The, SIB, nan F]	Gambia, The	SIB	F		wt
AG0129-Ca	AG0129-C	GM	AG0129-Ca [Gambia, The, SIB, nan F]	Gambia, The	SIB	F		wt
AG0129-Cb	AG0129-C	GM	AG0129-Cb [Gambia, The, SIB, nan F]	Gambia, The	SIB	F		wt
AG0133-Ca	AG0133-C	GM	AG0133-Ca [Gambia, The, SIB, nan F]	Gambia, The	SIB	F		wt
AG0133-Cb	AG0133-C	GM	AG0133-Cb [Gambia, The, SIB, nan F]	Gambia, The	SIB	F		wt
AG0134-Ca	AG0134-C	GM	AG0134-Ca [Gambia, The, SIB, nan F]	Gambia, The	SIB	F		wt
AG0134-Cb	AG0134-C	GM	AG0134-Cb [Gambia, The, SIB, nan F]	Gambia, The	SIB	F		wt
AG0136-Ca	AG0136-C	GM	AG0136-Ca [Gambia, The, SIB, nan F]	Gambia, The	SIB	F		wt
AG0136-Cb	AG0136-C	GM	AG0136-Cb [Gambia, The, SIB, nan F]	Gambia, The	SIB	F		wt
AG0137-Ca	AG0137-C	GM	AG0137-Ca [Gambia, The, SIB, nan F]	Gambia, The	SIB	F		wt
AG0137-Cb	AG0137-C	GM	AG0137-Cb [Gambia, The, SIB, nan F]	Gambia, The	SIB	F		wt
AG0138-Ca	AG0138-C	GM	AG0138-Ca [Gambia, The, SIB, nan F]	Gambia, The	SIB	F		wt
AG0138-Cb	AG0138-C	GM	AG0138-Cb [Gambia, The, SIB, nan F]	Gambia, The	SIB	F		wt
AG0139-Ca	AG0139-C	GM	AG0139-Ca [Gambia, The, SIB, nan F]	Gambia, The	SIB	F		wt
AG0139-Cb	AG0139-C	GM	AG0139-Cb [Gambia, The, SIB, nan F]	Gambia, The	SIB	F		wt
AG0141-Ca	AG0141-C	GM	AG0141-Ca [Gambia, The, SIB, nan F]	Gambia, The	SIB	F		wt
AG0141-Cb	AG0141-C	GM	AG0141-Cb [Gambia, The, SIB, nan F]	Gambia, The	SIB	F		C5
AG0142-Ca	AG0142-C	GM	AG0142-Ca [Gambia, The, KBK, nan F]	Gambia, The	KBK	F		wt
AG0142-Cb	AG0142-C	GM	AG0142-Cb [Gambia, The, KBK, nan F]	Gambia, The	KBK	F		wt
AG0143-Ca	AG0143-C	GM	AG0143-Ca [Gambia, The, KBK, nan F]	Gambia, The	KBK	F		wt
AG0143-Cb	AG0143-C	GM	AG0143-Cb [Gambia, The, KBK, nan F]	Gambia, The	KBK	F		wt
AG0144-Ca	AG0144-C	GM	AG0144-Ca [Gambia, The, KBK, nan F]	Gambia, The	KBK	F		wt
AG0144-Cb	AG0144-C	GM	AG0144-Cb [Gambia, The, KBK, nan F]	Gambia, The	KBK	F		wt
AG0145-Ca	AG0145-C	GM	AG0145-Ca [Gambia, The, KBK, nan F]	Gambia, The	KBK	F		wt
AG0145-Cb	AG0145-C	GM	AG0145-Cb [Gambia, The, KBK, nan F]	Gambia, The	KBK	F		wt
AG0146-Ca	AG0146-C	GM	AG0146-Ca [Gambia, The, KBK, nan F]	Gambia, The	KBK	F		wt
AG0146-Cb	AG0146-C	GM	AG0146-Cb [Gambia, The, KBK, nan F]	Gambia, The	KBK	F		wt
AG0147-Ca	AG0147-C	GM	AG0147-Ca [Gambia, The, KBK, nan F]	Gambia, The	KBK	F		wt
AG0147-Cb	AG0147-C	GM	AG0147-Cb [Gambia, The, KBK, nan F]	Gambia, The	KBK	F		wt
AG0148-Ca	AG0148-C	GM	AG0148-Ca [Gambia, The, KBK, nan F]	Gambia, The	KBK	F		wt
AG0148-Cb	AG0148-C	GM	AG0148-Cb [Gambia, The, KBK, nan F]	Gambia, The	KBK	F		wt
AG0152-Ca	AG0152-C	GM	AG0152-Ca [Gambia, The, KBK, nan F]	Gambia, The	KBK	F		wt
AG0152-Cb	AG0152-C	GM	AG0152-Cb [Gambia, The, KBK, nan F]	Gambia, The	KBK	F		wt
AG0153-Ca	AG0153-C	GM	AG0153-Ca [Gambia, The, KBK, nan F]	Gambia, The	KBK	F		wt
AG0153-Cb	AG0153-C	GM	AG0153-Cb [Gambia, The, KBK, nan F]	Gambia, The	KBK	F		wt
AG0156-Ca	AG0156-C	GM	AG0156-Ca [Gambia, The, KBK, nan F]	Gambia, The	KBK	F		wt
AG0156-Cb	AG0156-C	GM	AG0156-Cb [Gambia, The, KBK, nan F]	Gambia, The	KBK	F		wt
AG0159-Ca	AG0159-C	GM	AG0159-Ca [Gambia, The, KBK, nan F]	Gambia, The	KBK	F		wt
AG0159-Cb	AG0159-C	GM	AG0159-Cb [Gambia, The, KBK, nan F]	Gambia, The	KBK	F		wt
AG0162-Ca	AG0162-C	GM	AG0162-Ca [Gambia, The, KBK, nan F]	Gambia, The	KBK	F		wt
AG0162-Cb	AG0162-C	GM	AG0162-Cb [Gambia, The, KBK, nan F]	Gambia, The	KBK	F		wt
AG0163-Ca	AG0163-C	GM	AG0163-Ca [Gambia, The, KBK, nan F]	Gambia, The	KBK	F		wt
AG0163-Cb	AG0163-C	GM	AG0163-Cb [Gambia, The, KBK, nan F]	Gambia, The	KBK	F		wt
AG0169-Ca	AG0169-C	GM	AG0169-Ca [Gambia, The, MSN, nan F]	Gambia, The	MSN	F		wt
AG0169-Cb	AG0169-C	GM	AG0169-Cb [Gambia, The, MSN, nan F]	Gambia, The	MSN	F		wt
AG0170-Ca	AG0170-C	GM	AG0170-Ca [Gambia, The, MSN, nan F]	Gambia, The	MSN	F		wt
AG0170-Cb	AG0170-C	GM	AG0170-Cb [Gambia, The, MSN, nan F]	Gambia, The	MSN	F		wt
AG0172-Ca	AG0172-C	GM	AG0172-Ca [Gambia, The, MSN, nan F]	Gambia, The	MSN	F		wt
AG0172-Cb	AG0172-C	GM	AG0172-Cb [Gambia, The, MSN, nan F]	Gambia, The	MSN	F		wt
AG0178-Ca	AG0178-C	GM	AG0178-Ca [Gambia, The, KBK, nan F]	Gambia, The	KBK	F		wt
AG0178-Cb	AG0178-C	GM	AG0178-Cb [Gambia, The, KBK, nan F]	Gambia, The	KBK	F		wt
AG0179-Ca	AG0179-C	GM	AG0179-Ca [Gambia, The, KBK, nan F]	Gambia, The	KBK	F		wt
AG0179-Cb	AG0179-C	GM	AG0179-Cb [Gambia, The, KBK, nan F]	Gambia, The	KBK	F		wt
AG0181-Ca	AG0181-C	GM	AG0181-Ca [Gambia, The, SIB, nan F]	Gambia, The	SIB	F		wt
AG0181-Cb	AG0181-C	GM	AG0181-Cb [Gambia, The, SIB, nan F]	Gambia, The	SIB	F		wt
AG0183-Ca	AG0183-C	GM	AG0183-Ca [Gambia, The, SIB, nan F]	Gambia, The	SIB	F		wt
AG0183-Cb	AG0183-C	GM	AG0183-Cb [Gambia, The, SIB, nan F]	Gambia, The	SIB	F		wt
AG0195-Ca	AG0195-C	GM	AG0195-Ca [Gambia, The, SIB, nan F]	Gambia, The	SIB	F		wt
AG0195-Cb	AG0195-C	GM	AG0195-Cb [Gambia, The, SIB, nan F]	Gambia, The	SIB	F		wt
AG0197-Ca	AG0197-C	GM	AG0197-Ca [Gambia, The, MSN, nan F]	Gambia, The	MSN	F		wt
AG0197-Cb	AG0197-C	GM	AG0197-Cb [Gambia, The, MSN, nan F]	Gambia, The	MSN	F		wt
AG0202-Ca	AG0202-C	GM	AG0202-Ca [Gambia, The, MSN, nan F]	Gambia, The	MSN	F		wt
AG0202-Cb	AG0202-C	GM	AG0202-Cb [Gambia, The, MSN, nan F]	Gambia, The	MSN	F		wt
AG0203-Ca	AG0203-C	GM	AG0203-Ca [Gambia, The, MSN, nan F]	Gambia, The	MSN	F		wt
AG0203-Cb	AG0203-C	GM	AG0203-Cb [Gambia, The, MSN, nan F]	Gambia, The	MSN	F		C5
AG0204-Ca	AG0204-C	GM	AG0204-Ca [Gambia, The, MSN, nan F]	Gambia, The	MSN	F		wt
AG0204-Cb	AG0204-C	GM	AG0204-Cb [Gambia, The, MSN, nan F]	Gambia, The	MSN	F		wt
AG0206-Ca	AG0206-C	GM	AG0206-Ca [Gambia, The, MSN, nan F]	Gambia, The	MSN	F		wt
AG0206-Cb	AG0206-C	GM	AG0206-Cb [Gambia, The, MSN, nan F]	Gambia, The	MSN	F		wt
AG0208-Ca	AG0208-C	GM	AG0208-Ca [Gambia, The, MSN, nan F]	Gambia, The	MSN	F		wt
AG0208-Cb	AG0208-C	GM	AG0208-Cb [Gambia, The, MSN, nan F]	Gambia, The	MSN	F		wt
AG0214-Ca	AG0214-C	GM	AG0214-Ca [Gambia, The, KSK, nan F]	Gambia, The	KSK	F		wt
AG0214-Cb	AG0214-C	GM	AG0214-Cb [Gambia, The, KSK, nan F]	Gambia, The	KSK	F		wt
AG0221-Ca	AG0221-C	GM	AG0221-Ca [Gambia, The, KBK, nan F]	Gambia, The	KBK	F		wt
AG0221-Cb	AG0221-C	GM	AG0221-Cb [Gambia, The, KBK, nan F]	Gambia, The	KBK	F		wt
AG0223-Ca	AG0223-C	GM	AG0223-Ca [Gambia, The, KBK, nan F]	Gambia, The	KBK	F		wt
AG0223-Cb	AG0223-C	GM	AG0223-Cb [Gambia, The, KBK, nan F]	Gambia, The	KBK	F		wt
AG0227-Ca	AG0227-C	GM	AG0227-Ca [Gambia, The, KBK, nan F]	Gambia, The	KBK	F		wt
AG0227-Cb	AG0227-C	GM	AG0227-Cb [Gambia, The, KBK, nan F]	Gambia, The	KBK	F		wt
AG0229-Ca	AG0229-C	GM	AG0229-Ca [Gambia, The, KSK, nan F]	Gambia, The	KSK	F		wt
AG0229-Cb	AG0229-C	GM	AG0229-Cb [Gambia, The, KSK, nan F]	Gambia, The	KSK	F		wt
AG0230-Ca	AG0230-C	GM	AG0230-Ca [Gambia, The, KSK, nan F]	Gambia, The	KSK	F		wt
AG0230-Cb	AG0230-C	GM	AG0230-Cb [Gambia, The, KSK, nan F]	Gambia, The	KSK	F		wt
AG0231-Ca	AG0231-C	GM	AG0231-Ca [Gambia, The, KSK, nan F]	Gambia, The	KSK	F		wt
AG0231-Cb	AG0231-C	GM	AG0231-Cb [Gambia, The, KSK, nan F]	Gambia, The	KSK	F		wt
AG0232-Ca	AG0232-C	GM	AG0232-Ca [Gambia, The, KSK, nan F]	Gambia, The	KSK	F		wt
AG0232-Cb	AG0232-C	GM	AG0232-Cb [Gambia, The, KSK, nan F]	Gambia, The	KSK	F		wt
AG0263-Ca	AG0263-C	GM	AG0263-Ca [Gambia, The, KBK, nan F]	Gambia, The	KBK	F		wt
AG0263-Cb	AG0263-C	GM	AG0263-Cb [Gambia, The, KBK, nan F]	Gambia, The	KBK	F		wt
AJ0023-Ca	AJ0023-C	GW	AJ0023-Ca [Guinea-Bissau, Antula, M/S F]	Guinea-Bissau	Antula	F	M/S	wt
AJ0023-Cb	AJ0023-C	GW	AJ0023-Cb [Guinea-Bissau, Antula, M/S F]	Guinea-Bissau	Antula	F	M/S	wt
AJ0024-Ca	AJ0024-C	GW	AJ0024-Ca [Guinea-Bissau, Antula, M/S F]	Guinea-Bissau	Antula	F	M/S	wt
AJ0024-Cb	AJ0024-C	GW	AJ0024-Cb [Guinea-Bissau, Antula, M/S F]	Guinea-Bissau	Antula	F	M/S	wt
AJ0028-Ca	AJ0028-C	GW	AJ0028-Ca [Guinea-Bissau, Antula, M/S F]	Guinea-Bissau	Antula	F	M/S	wt
AJ0028-Cb	AJ0028-C	GW	AJ0028-Cb [Guinea-Bissau, Antula, M/S F]	Guinea-Bissau	Antula	F	M/S	wt
AJ0032-Ca	AJ0032-C	GW	AJ0032-Ca [Guinea-Bissau, Antula, S F]	Guinea-Bissau	Antula	F	S	wt
AJ0032-Cb	AJ0032-C	GW	AJ0032-Cb [Guinea-Bissau, Antula, S F]	Guinea-Bissau	Antula	F	S	wt
AJ0035-Ca	AJ0035-C	GW	AJ0035-Ca [Guinea-Bissau, Antula, M F]	Guinea-Bissau	Antula	F	M	wt
AJ0035-Cb	AJ0035-C	GW	AJ0035-Cb [Guinea-Bissau, Antula, M F]	Guinea-Bissau	Antula	F	M	wt
AJ0036-Ca	AJ0036-C	GW	AJ0036-Ca [Guinea-Bissau, Antula, S F]	Guinea-Bissau	Antula	F	S	wt
AJ0036-Cb	AJ0036-C	GW	AJ0036-Cb [Guinea-Bissau, Antula, S F]	Guinea-Bissau	Antula	F	S	C5
AJ0037-Ca	AJ0037-C	GW	AJ0037-Ca [Guinea-Bissau, Antula, M F]	Guinea-Bissau	Antula	F	M	wt
AJ0037-Cb	AJ0037-C	GW	AJ0037-Cb [Guinea-Bissau, Antula, M F]	Guinea-Bissau	Antula	F	M	wt
AJ0038-Ca	AJ0038-C	GW	AJ0038-Ca [Guinea-Bissau, Antula, S F]	Guinea-Bissau	Antula	F	S	wt
AJ0038-Cb	AJ0038-C	GW	AJ0038-Cb [Guinea-Bissau, Antula, S F]	Guinea-Bissau	Antula	F	S	wt
AJ0039-Ca	AJ0039-C	GW	AJ0039-Ca [Guinea-Bissau, Antula, M F]	Guinea-Bissau	Antula	F	M	wt
AJ0039-Cb	AJ0039-C	GW	AJ0039-Cb [Guinea-Bissau, Antula, M F]	Guinea-Bissau	Antula	F	M	wt
AJ0043-Ca	AJ0043-C	GW	AJ0043-Ca [Guinea-Bissau, Antula, S F]	Guinea-Bissau	Antula	F	S	wt
AJ0043-Cb	AJ0043-C	GW	AJ0043-Cb [Guinea-Bissau, Antula, S F]	Guinea-Bissau	Antula	F	S	wt
AJ0044-Ca	AJ0044-C	GW	AJ0044-Ca [Guinea-Bissau, Antula, S F]	Guinea-Bissau	Antula	F	S	wt
AJ0044-Cb	AJ0044-C	GW	AJ0044-Cb [Guinea-Bissau, Antula, S F]	Guinea-Bissau	Antula	F	S	wt
AJ0045-Ca	AJ0045-C	GW	AJ0045-Ca [Guinea-Bissau, Antula, S F]	Guinea-Bissau	Antula	F	S	wt
AJ0045-Cb	AJ0045-C	GW	AJ0045-Cb [Guinea-Bissau, Antula, S F]	Guinea-Bissau	Antula	F	S	wt
AJ0047-Ca	AJ0047-C	GW	AJ0047-Ca [Guinea-Bissau, Antula, S F]	Guinea-Bissau	Antula	F	S	wt
AJ0047-Cb	AJ0047-C	GW	AJ0047-Cb [Guinea-Bissau, Antula, S F]	Guinea-Bissau	Antula	F	S	wt
AJ0051-Ca	AJ0051-C	GW	AJ0051-Ca [Guinea-Bissau, Antula, M/S F]	Guinea-Bissau	Antula	F	M/S	wt
AJ0051-Cb	AJ0051-C	GW	AJ0051-Cb [Guinea-Bissau, Antula, M/S F]	Guinea-Bissau	Antula	F	M/S	wt
AJ0052-Ca	AJ0052-C	GW	AJ0052-Ca [Guinea-Bissau, Antula, S F]	Guinea-Bissau	Antula	F	S	wt
AJ0052-Cb	AJ0052-C	GW	AJ0052-Cb [Guinea-Bissau, Antula, S F]	Guinea-Bissau	Antula	F	S	wt
AJ0056-Ca	AJ0056-C	GW	AJ0056-Ca [Guinea-Bissau, Antula, M/S F]	Guinea-Bissau	Antula	F	M/S	wt
AJ0056-Cb	AJ0056-C	GW	AJ0056-Cb [Guinea-Bissau, Antula, M/S F]	Guinea-Bissau	Antula	F	M/S	wt
AJ0059-Ca	AJ0059-C	GW	AJ0059-Ca [Guinea-Bissau, Antula, S F]	Guinea-Bissau	Antula	F	S	wt
AJ0059-Cb	AJ0059-C	GW	AJ0059-Cb [Guinea-Bissau, Antula, S F]	Guinea-Bissau	Antula	F	S	wt
AJ0060-Ca	AJ0060-C	GW	AJ0060-Ca [Guinea-Bissau, Antula, S F]	Guinea-Bissau	Antula	F	S	wt
AJ0060-Cb	AJ0060-C	GW	AJ0060-Cb [Guinea-Bissau, Antula, S F]	Guinea-Bissau	Antula	F	S	C5
AJ0061-Ca	AJ0061-C	GW	AJ0061-Ca [Guinea-Bissau, Antula, S F]	Guinea-Bissau	Antula	F	S	wt
AJ0061-Cb	AJ0061-C	GW	AJ0061-Cb [Guinea-Bissau, Antula, S F]	Guinea-Bissau	Antula	F	S	wt
AJ0063-Ca	AJ0063-C	GW	AJ0063-Ca [Guinea-Bissau, Antula, S F]	Guinea-Bissau	Antula	F	S	wt
AJ0063-Cb	AJ0063-C	GW	AJ0063-Cb [Guinea-Bissau, Antula, S F]	Guinea-Bissau	Antula	F	S	wt
AJ0064-Ca	AJ0064-C	GW	AJ0064-Ca [Guinea-Bissau, Antula, M/S F]	Guinea-Bissau	Antula	F	M/S	wt
AJ0064-Cb	AJ0064-C	GW	AJ0064-Cb [Guinea-Bissau, Antula, M/S F]	Guinea-Bissau	Antula	F	M/S	wt
AJ0066-Ca	AJ0066-C	GW	AJ0066-Ca [Guinea-Bissau, Antula, M/S F]	Guinea-Bissau	Antula	F	M/S	wt
AJ0066-Cb	AJ0066-C	GW	AJ0066-Cb [Guinea-Bissau, Antula, M/S F]	Guinea-Bissau	Antula	F	M/S	wt
AJ0068-Ca	AJ0068-C	GW	AJ0068-Ca [Guinea-Bissau, Antula, M/S F]	Guinea-Bissau	Antula	F	M/S	wt
AJ0068-Cb	AJ0068-C	GW	AJ0068-Cb [Guinea-Bissau, Antula, M/S F]	Guinea-Bissau	Antula	F	M/S	wt
AJ0070-Ca	AJ0070-C	GW	AJ0070-Ca [Guinea-Bissau, Antula, S F]	Guinea-Bissau	Antula	F	S	wt
AJ0070-Cb	AJ0070-C	GW	AJ0070-Cb [Guinea-Bissau, Antula, S F]	Guinea-Bissau	Antula	F	S	wt
AJ0071-Ca	AJ0071-C	GW	AJ0071-Ca [Guinea-Bissau, Antula, S F]	Guinea-Bissau	Antula	F	S	wt
AJ0071-Cb	AJ0071-C	GW	AJ0071-Cb [Guinea-Bissau, Antula, S F]	Guinea-Bissau	Antula	F	S	wt
AJ0072-Ca	AJ0072-C	GW	AJ0072-Ca [Guinea-Bissau, Antula, S F]	Guinea-Bissau	Antula	F	S	wt
AJ0072-Cb	AJ0072-C	GW	AJ0072-Cb [Guinea-Bissau, Antula, S F]	Guinea-Bissau	Antula	F	S	wt
AJ0074-Ca	AJ0074-C	GW	AJ0074-Ca [Guinea-Bissau, Antula, S F]	Guinea-Bissau	Antula	F	S	wt
AJ0074-Cb	AJ0074-C	GW	AJ0074-Cb [Guinea-Bissau, Antula, S F]	Guinea-Bissau	Antula	F	S	wt
AJ0075-Ca	AJ0075-C	GW	AJ0075-Ca [Guinea-Bissau, Antula, M/S F]	Guinea-Bissau	Antula	F	M/S	C5
AJ0075-Cb	AJ0075-C	GW	AJ0075-Cb [Guinea-Bissau, Antula, M/S F]	Guinea-Bissau	Antula	F	M/S	wt
AJ0076-Ca	AJ0076-C	GW	AJ0076-Ca [Guinea-Bissau, Antula, S F]	Guinea-Bissau	Antula	F	S	wt
AJ0076-Cb	AJ0076-C	GW	AJ0076-Cb [Guinea-Bissau, Antula, S F]	Guinea-Bissau	Antula	F	S	wt
AJ0077-Ca	AJ0077-C	GW	AJ0077-Ca [Guinea-Bissau, Antula, M/S F]	Guinea-Bissau	Antula	F	M/S	wt
AJ0077-Cb	AJ0077-C	GW	AJ0077-Cb [Guinea-Bissau, Antula, M/S F]	Guinea-Bissau	Antula	F	M/S	wt
AJ0078-Ca	AJ0078-C	GW	AJ0078-Ca [Guinea-Bissau, Antula, M/S F]	Guinea-Bissau	Antula	F	M/S	wt
AJ0078-Cb	AJ0078-C	GW	AJ0078-Cb [Guinea-Bissau, Antula, M/S F]	Guinea-Bissau	Antula	F	M/S	wt
AJ0080-Ca	AJ0080-C	GW	AJ0080-Ca [Guinea-Bissau, Antula, S F]	Guinea-Bissau	Antula	F	S	wt
AJ0080-Cb	AJ0080-C	GW	AJ0080-Cb [Guinea-Bissau, Antula, S F]	Guinea-Bissau	Antula	F	S	C5
AJ0081-Ca	AJ0081-C	GW	AJ0081-Ca [Guinea-Bissau, Antula, S F]	Guinea-Bissau	Antula	F	S	wt
AJ0081-Cb	AJ0081-C	GW	AJ0081-Cb [Guinea-Bissau, Antula, S F]	Guinea-Bissau	Antula	F	S	wt
AJ0084-Ca	AJ0084-C	GW	AJ0084-Ca [Guinea-Bissau, Antula, S F]	Guinea-Bissau	Antula	F	S	wt
AJ0084-Cb	AJ0084-C	GW	AJ0084-Cb [Guinea-Bissau, Antula, S F]	Guinea-Bissau	Antula	F	S	wt
AJ0085-Ca	AJ0085-C	GW	AJ0085-Ca [Guinea-Bissau, Antula, S F]	Guinea-Bissau	Antula	F	S	wt
AJ0085-Cb	AJ0085-C	GW	AJ0085-Cb [Guinea-Bissau, Antula, S F]	Guinea-Bissau	Antula	F	S	wt
AJ0086-Ca	AJ0086-C	GW	AJ0086-Ca [Guinea-Bissau, Antula, S F]	Guinea-Bissau	Antula	F	S	wt
AJ0086-Cb	AJ0086-C	GW	AJ0086-Cb [Guinea-Bissau, Antula, S F]	Guinea-Bissau	Antula	F	S	wt
AJ0087-Ca	AJ0087-C	GW	AJ0087-Ca [Guinea-Bissau, Antula, M/S F]	Guinea-Bissau	Antula	F	M/S	wt
AJ0087-Cb	AJ0087-C	GW	AJ0087-Cb [Guinea-Bissau, Antula, M/S F]	Guinea-Bissau	Antula	F	M/S	wt
AJ0088-Ca	AJ0088-C	GW	AJ0088-Ca [Guinea-Bissau, Antula, S F]	Guinea-Bissau	Antula	F	S	wt
AJ0088-Cb	AJ0088-C	GW	AJ0088-Cb [Guinea-Bissau, Antula, S F]	Guinea-Bissau	Antula	F	S	wt
AJ0090-Ca	AJ0090-C	GW	AJ0090-Ca [Guinea-Bissau, Antula, S F]	Guinea-Bissau	Antula	F	S	wt
AJ0090-Cb	AJ0090-C	GW	AJ0090-Cb [Guinea-Bissau, Antula, S F]	Guinea-Bissau	Antula	F	S	wt
AJ0092-Ca	AJ0092-C	GW	AJ0092-Ca [Guinea-Bissau, Antula, S F]	Guinea-Bissau	Antula	F	S	wt
AJ0092-Cb	AJ0092-C	GW	AJ0092-Cb [Guinea-Bissau, Antula, S F]	Guinea-Bissau	Antula	F	S	wt
AJ0093-Ca	AJ0093-C	GW	AJ0093-Ca [Guinea-Bissau, Antula, M/S F]	Guinea-Bissau	Antula	F	M/S	wt
AJ0093-Cb	AJ0093-C	GW	AJ0093-Cb [Guinea-Bissau, Antula, M/S F]	Guinea-Bissau	Antula	F	M/S	wt
AJ0095-Ca	AJ0095-C	GW	AJ0095-Ca [Guinea-Bissau, Antula, M/S F]	Guinea-Bissau	Antula	F	M/S	wt
AJ0095-Cb	AJ0095-C	GW	AJ0095-Cb [Guinea-Bissau, Antula, M/S F]	Guinea-Bissau	Antula	F	M/S	wt
AJ0096-Ca	AJ0096-C	GW	AJ0096-Ca [Guinea-Bissau, Antula, S F]	Guinea-Bissau	Antula	F	S	wt
AJ0096-Cb	AJ0096-C	GW	AJ0096-Cb [Guinea-Bissau, Antula, S F]	Guinea-Bissau	Antula	F	S	C5
AJ0097-Ca	AJ0097-C	GW	AJ0097-Ca [Guinea-Bissau, Antula, S F]	Guinea-Bissau	Antula	F	S	wt
AJ0097-Cb	AJ0097-C	GW	AJ0097-Cb [Guinea-Bissau, Antula, S F]	Guinea-Bissau	Antula	F	S	wt
AJ0098-Ca	AJ0098-C	GW	AJ0098-Ca [Guinea-Bissau, Antula, S F]	Guinea-Bissau	Antula	F	S	wt
AJ0098-Cb	AJ0098-C	GW	AJ0098-Cb [Guinea-Bissau, Antula, S F]	Guinea-Bissau	Antula	F	S	wt
AJ0099-Ca	AJ0099-C	GW	AJ0099-Ca [Guinea-Bissau, Antula, S F]	Guinea-Bissau	Antula	F	S	C5
AJ0099-Cb	AJ0099-C	GW	AJ0099-Cb [Guinea-Bissau, Antula, S F]	Guinea-Bissau	Antula	F	S	wt
AJ0100-Ca	AJ0100-C	GW	AJ0100-Ca [Guinea-Bissau, Antula, S F]	Guinea-Bissau	Antula	F	S	wt
AJ0100-Cb	AJ0100-C	GW	AJ0100-Cb [Guinea-Bissau, Antula, S F]	Guinea-Bissau	Antula	F	S	wt
AJ0101-Ca	AJ0101-C	GW	AJ0101-Ca [Guinea-Bissau, Antula, M/S F]	Guinea-Bissau	Antula	F	M/S	wt
AJ0101-Cb	AJ0101-C	GW	AJ0101-Cb [Guinea-Bissau, Antula, M/S F]	Guinea-Bissau	Antula	F	M/S	wt
AJ0102-Ca	AJ0102-C	GW	AJ0102-Ca [Guinea-Bissau, Antula, M/S F]	Guinea-Bissau	Antula	F	M/S	wt
AJ0102-Cb	AJ0102-C	GW	AJ0102-Cb [Guinea-Bissau, Antula, M/S F]	Guinea-Bissau	Antula	F	M/S	wt
AJ0103-Ca	AJ0103-C	GW	AJ0103-Ca [Guinea-Bissau, Antula, S F]	Guinea-Bissau	Antula	F	S	wt
AJ0103-Cb	AJ0103-C	GW	AJ0103-Cb [Guinea-Bissau, Antula, S F]	Guinea-Bissau	Antula	F	S	wt
AJ0105-Ca	AJ0105-C	GW	AJ0105-Ca [Guinea-Bissau, Antula, M/S F]	Guinea-Bissau	Antula	F	M/S	wt
AJ0105-Cb	AJ0105-C	GW	AJ0105-Cb [Guinea-Bissau, Antula, M/S F]	Guinea-Bissau	Antula	F	M/S	wt
AJ0107-Ca	AJ0107-C	GW	AJ0107-Ca [Guinea-Bissau, Antula, S F]	Guinea-Bissau	Antula	F	S	wt
AJ0107-Cb	AJ0107-C	GW	AJ0107-Cb [Guinea-Bissau, Antula, S F]	Guinea-Bissau	Antula	F	S	C5
AJ0109-Ca	AJ0109-C	GW	AJ0109-Ca [Guinea-Bissau, Antula, S F]	Guinea-Bissau	Antula	F	S	wt
AJ0109-Cb	AJ0109-C	GW	AJ0109-Cb [Guinea-Bissau, Antula, S F]	Guinea-Bissau	Antula	F	S	wt
AJ0113-Ca	AJ0113-C	GW	AJ0113-Ca [Guinea-Bissau, Antula, S F]	Guinea-Bissau	Antula	F	S	wt
AJ0113-Cb	AJ0113-C	GW	AJ0113-Cb [Guinea-Bissau, Antula, S F]	Guinea-Bissau	Antula	F	S	wt
AJ0115-Ca	AJ0115-C	GW	AJ0115-Ca [Guinea-Bissau, Antula, M F]	Guinea-Bissau	Antula	F	M	wt
AJ0115-Cb	AJ0115-C	GW	AJ0115-Cb [Guinea-Bissau, Antula, M F]	Guinea-Bissau	Antula	F	M	wt
AJ0116-Ca	AJ0116-C	GW	AJ0116-Ca [Guinea-Bissau, Antula, S F]	Guinea-Bissau	Antula	F	S	wt
AJ0116-Cb	AJ0116-C	GW	AJ0116-Cb [Guinea-Bissau, Antula, S F]	Guinea-Bissau	Antula	F	S	wt
AJ0117-Ca	AJ0117-C	GW	AJ0117-Ca [Guinea-Bissau, Antula, S F]	Guinea-Bissau	Antula	F	S	wt
AJ0117-Cb	AJ0117-C	GW	AJ0117-Cb [Guinea-Bissau, Antula, S F]	Guinea-Bissau	Antula	F	S	wt
AJ0119-Ca	AJ0119-C	GW	AJ0119-Ca [Guinea-Bissau, Antula, S F]	Guinea-Bissau	Antula	F	S	wt
AJ0119-Cb	AJ0119-C	GW	AJ0119-Cb [Guinea-Bissau, Antula, S F]	Guinea-Bissau	Antula	F	S	wt
AJ0128-Ca	AJ0128-C	GW	AJ0128-Ca [Guinea-Bissau, Safim, S F]	Guinea-Bissau	Safim	F	S	wt
AJ0128-Cb	AJ0128-C	GW	AJ0128-Cb [Guinea-Bissau, Safim, S F]	Guinea-Bissau	Safim	F	S	wt
AJ0129-Ca	AJ0129-C	GW	AJ0129-Ca [Guinea-Bissau, Safim, M/S F]	Guinea-Bissau	Safim	F	M/S	wt
AJ0129-Cb	AJ0129-C	GW	AJ0129-Cb [Guinea-Bissau, Safim, M/S F]	Guinea-Bissau	Safim	F	M/S	wt
AJ0130-Ca	AJ0130-C	GW	AJ0130-Ca [Guinea-Bissau, Safim, S F]	Guinea-Bissau	Safim	F	S	wt
AJ0130-Cb	AJ0130-C	GW	AJ0130-Cb [Guinea-Bissau, Safim, S F]	Guinea-Bissau	Safim	F	S	wt
AJ0131-Ca	AJ0131-C	GW	AJ0131-Ca [Guinea-Bissau, Safim, S F]	Guinea-Bissau	Safim	F	S	wt
AJ0131-Cb	AJ0131-C	GW	AJ0131-Cb [Guinea-Bissau, Safim, S F]	Guinea-Bissau	Safim	F	S	wt
AJ0132-Ca	AJ0132-C	GW	AJ0132-Ca [Guinea-Bissau, Safim, S F]	Guinea-Bissau	Safim	F	S	wt
AJ0132-Cb	AJ0132-C	GW	AJ0132-Cb [Guinea-Bissau, Safim, S F]	Guinea-Bissau	Safim	F	S	wt
AJ0133-Ca	AJ0133-C	GW	AJ0133-Ca [Guinea-Bissau, Safim, S F]	Guinea-Bissau	Safim	F	S	wt
AJ0133-Cb	AJ0133-C	GW	AJ0133-Cb [Guinea-Bissau, Safim, S F]	Guinea-Bissau	Safim	F	S	C5
AJ0134-Ca	AJ0134-C	GW	AJ0134-Ca [Guinea-Bissau, Safim, S F]	Guinea-Bissau	Safim	F	S	wt
AJ0134-Cb	AJ0134-C	GW	AJ0134-Cb [Guinea-Bissau, Safim, S F]	Guinea-Bissau	Safim	F	S	wt
AJ0135-Ca	AJ0135-C	GW	AJ0135-Ca [Guinea-Bissau, Safim, S F]	Guinea-Bissau	Safim	F	S	wt
AJ0135-Cb	AJ0135-C	GW	AJ0135-Cb [Guinea-Bissau, Safim, S F]	Guinea-Bissau	Safim	F	S	wt
AJ0136-Ca	AJ0136-C	GW	AJ0136-Ca [Guinea-Bissau, Safim, S F]	Guinea-Bissau	Safim	F	S	wt
AJ0136-Cb	AJ0136-C	GW	AJ0136-Cb [Guinea-Bissau, Safim, S F]	Guinea-Bissau	Safim	F	S	wt
AJ0137-Ca	AJ0137-C	GW	AJ0137-Ca [Guinea-Bissau, Safim, S F]	Guinea-Bissau	Safim	F	S	wt
AJ0137-Cb	AJ0137-C	GW	AJ0137-Cb [Guinea-Bissau, Safim, S F]	Guinea-Bissau	Safim	F	S	wt
AJ0138-Ca	AJ0138-C	GW	AJ0138-Ca [Guinea-Bissau, Safim, S F]	Guinea-Bissau	Safim	F	S	wt
AJ0138-Cb	AJ0138-C	GW	AJ0138-Cb [Guinea-Bissau, Safim, S F]	Guinea-Bissau	Safim	F	S	wt
AJ0139-Ca	AJ0139-C	GW	AJ0139-Ca [Guinea-Bissau, Safim, S F]	Guinea-Bissau	Safim	F	S	wt
AJ0139-Cb	AJ0139-C	GW	AJ0139-Cb [Guinea-Bissau, Safim, S F]	Guinea-Bissau	Safim	F	S	wt
AJ0140-Ca	AJ0140-C	GW	AJ0140-Ca [Guinea-Bissau, Safim, S F]	Guinea-Bissau	Safim	F	S	wt
AJ0140-Cb	AJ0140-C	GW	AJ0140-Cb [Guinea-Bissau, Safim, S F]	Guinea-Bissau	Safim	F	S	wt
AJ0141-Ca	AJ0141-C	GW	AJ0141-Ca [Guinea-Bissau, Safim, S F]	Guinea-Bissau	Safim	F	S	wt
AJ0141-Cb	AJ0141-C	GW	AJ0141-Cb [Guinea-Bissau, Safim, S F]	Guinea-Bissau	Safim	F	S	wt
AJ0142-Ca	AJ0142-C	GW	AJ0142-Ca [Guinea-Bissau, Safim, S F]	Guinea-Bissau	Safim	F	S	wt
AJ0142-Cb	AJ0142-C	GW	AJ0142-Cb [Guinea-Bissau, Safim, S F]	Guinea-Bissau	Safim	F	S	wt
AJ0143-Ca	AJ0143-C	GW	AJ0143-Ca [Guinea-Bissau, Safim, S F]	Guinea-Bissau	Safim	F	S	wt
AJ0143-Cb	AJ0143-C	GW	AJ0143-Cb [Guinea-Bissau, Safim, S F]	Guinea-Bissau	Safim	F	S	wt
AJ0144-Ca	AJ0144-C	GW	AJ0144-Ca [Guinea-Bissau, Safim, S F]	Guinea-Bissau	Safim	F	S	wt
AJ0144-Cb	AJ0144-C	GW	AJ0144-Cb [Guinea-Bissau, Safim, S F]	Guinea-Bissau	Safim	F	S	wt
AJ0145-Ca	AJ0145-C	GW	AJ0145-Ca [Guinea-Bissau, Safim, S F]	Guinea-Bissau	Safim	F	S	wt
AJ0145-Cb	AJ0145-C	GW	AJ0145-Cb [Guinea-Bissau, Safim, S F]	Guinea-Bissau	Safim	F	S	wt
AJ0146-Ca	AJ0146-C	GW	AJ0146-Ca [Guinea-Bissau, Safim, S F]	Guinea-Bissau	Safim	F	S	wt
AJ0146-Cb	AJ0146-C	GW	AJ0146-Cb [Guinea-Bissau, Safim, S F]	Guinea-Bissau	Safim	F	S	wt
AJ0147-Ca	AJ0147-C	GW	AJ0147-Ca [Guinea-Bissau, Safim, M/S F]	Guinea-Bissau	Safim	F	M/S	wt
AJ0147-Cb	AJ0147-C	GW	AJ0147-Cb [Guinea-Bissau, Safim, M/S F]	Guinea-Bissau	Safim	F	M/S	C5
AJ0148-Ca	AJ0148-C	GW	AJ0148-Ca [Guinea-Bissau, Safim, S F]	Guinea-Bissau	Safim	F	S	wt
AJ0148-Cb	AJ0148-C	GW	AJ0148-Cb [Guinea-Bissau, Safim, S F]	Guinea-Bissau	Safim	F	S	C5
AJ0149-Ca	AJ0149-C	GW	AJ0149-Ca [Guinea-Bissau, Safim, S F]	Guinea-Bissau	Safim	F	S	wt
AJ0149-Cb	AJ0149-C	GW	AJ0149-Cb [Guinea-Bissau, Safim, S F]	Guinea-Bissau	Safim	F	S	wt
AJ0150-Ca	AJ0150-C	GW	AJ0150-Ca [Guinea-Bissau, Safim, S F]	Guinea-Bissau	Safim	F	S	wt
AJ0150-Cb	AJ0150-C	GW	AJ0150-Cb [Guinea-Bissau, Safim, S F]	Guinea-Bissau	Safim	F	S	wt
AJ0151-Ca	AJ0151-C	GW	AJ0151-Ca [Guinea-Bissau, Safim, S F]	Guinea-Bissau	Safim	F	S	wt
AJ0151-Cb	AJ0151-C	GW	AJ0151-Cb [Guinea-Bissau, Safim, S F]	Guinea-Bissau	Safim	F	S	wt
AJ0152-Ca	AJ0152-C	GW	AJ0152-Ca [Guinea-Bissau, Safim, M/S F]	Guinea-Bissau	Safim	F	M/S	wt
AJ0152-Cb	AJ0152-C	GW	AJ0152-Cb [Guinea-Bissau, Safim, M/S F]	Guinea-Bissau	Safim	F	M/S	wt
AJ0153-Ca	AJ0153-C	GW	AJ0153-Ca [Guinea-Bissau, Safim, S F]	Guinea-Bissau	Safim	F	S	C5
AJ0153-Cb	AJ0153-C	GW	AJ0153-Cb [Guinea-Bissau, Safim, S F]	Guinea-Bissau	Safim	F	S	wt
AJ0154-Ca	AJ0154-C	GW	AJ0154-Ca [Guinea-Bissau, Safim, S F]	Guinea-Bissau	Safim	F	S	wt
AJ0154-Cb	AJ0154-C	GW	AJ0154-Cb [Guinea-Bissau, Safim, S F]	Guinea-Bissau	Safim	F	S	wt
AJ0155-Ca	AJ0155-C	GW	AJ0155-Ca [Guinea-Bissau, Safim, S F]	Guinea-Bissau	Safim	F	S	wt
AJ0155-Cb	AJ0155-C	GW	AJ0155-Cb [Guinea-Bissau, Safim, S F]	Guinea-Bissau	Safim	F	S	wt
AJ0156-Ca	AJ0156-C	GW	AJ0156-Ca [Guinea-Bissau, Safim, S F]	Guinea-Bissau	Safim	F	S	wt
AJ0156-Cb	AJ0156-C	GW	AJ0156-Cb [Guinea-Bissau, Safim, S F]	Guinea-Bissau	Safim	F	S	wt
AJ0157-Ca	AJ0157-C	GW	AJ0157-Ca [Guinea-Bissau, Safim, S F]	Guinea-Bissau	Safim	F	S	wt
AJ0157-Cb	AJ0157-C	GW	AJ0157-Cb [Guinea-Bissau, Safim, S F]	Guinea-Bissau	Safim	F	S	wt
AJ0158-Ca	AJ0158-C	GW	AJ0158-Ca [Guinea-Bissau, Safim, M/S F]	Guinea-Bissau	Safim	F	M/S	wt
AJ0158-Cb	AJ0158-C	GW	AJ0158-Cb [Guinea-Bissau, Safim, M/S F]	Guinea-Bissau	Safim	F	M/S	wt
AJ0159-Ca	AJ0159-C	GW	AJ0159-Ca [Guinea-Bissau, Safim, S F]	Guinea-Bissau	Safim	F	S	wt
AJ0159-Cb	AJ0159-C	GW	AJ0159-Cb [Guinea-Bissau, Safim, S F]	Guinea-Bissau	Safim	F	S	C5
AJ0161-Ca	AJ0161-C	GW	AJ0161-Ca [Guinea-Bissau, Safim, S F]	Guinea-Bissau	Safim	F	S	wt
AJ0161-Cb	AJ0161-C	GW	AJ0161-Cb [Guinea-Bissau, Safim, S F]	Guinea-Bissau	Safim	F	S	wt
AK0060-Ca	AK0060-C	KE	AK0060-Ca [Kenya, Kilifi-Junju, nan F]	Kenya	Kilifi-Junju	F		wt
AK0060-Cb	AK0060-C	KE	AK0060-Cb [Kenya, Kilifi-Junju, nan F]	Kenya	Kilifi-Junju	F		C3
AK0062-Ca	AK0062-C	KE	AK0062-Ca [Kenya, Kilifi-Junju, nan F]	Kenya	Kilifi-Junju	F		C3
AK0062-Cb	AK0062-C	KE	AK0062-Cb [Kenya, Kilifi-Junju, nan F]	Kenya	Kilifi-Junju	F		wt
AK0065-Ca	AK0065-C	KE	AK0065-Ca [Kenya, Kilifi-Mbogolo, nan F]	Kenya	Kilifi-Mbogolo	F		C3
AK0065-Cb	AK0065-C	KE	AK0065-Cb [Kenya, Kilifi-Mbogolo, nan F]	Kenya	Kilifi-Mbogolo	F		C3
AK0066-Ca	AK0066-C	KE	AK0066-Ca [Kenya, Kilifi-Mbogolo, nan F]	Kenya	Kilifi-Mbogolo	F		C3
AK0066-Cb	AK0066-C	KE	AK0066-Cb [Kenya, Kilifi-Mbogolo, nan F]	Kenya	Kilifi-Mbogolo	F		C3
AK0067-Ca	AK0067-C	KE	AK0067-Ca [Kenya, Kilifi-Mbogolo, nan F]	Kenya	Kilifi-Mbogolo	F		C3
AK0067-Cb	AK0067-C	KE	AK0067-Cb [Kenya, Kilifi-Mbogolo, nan F]	Kenya	Kilifi-Mbogolo	F		wt
AK0068-Ca	AK0068-C	KE	AK0068-Ca [Kenya, Kilifi-Mbogolo, nan F]	Kenya	Kilifi-Mbogolo	F		C3
AK0068-Cb	AK0068-C	KE	AK0068-Cb [Kenya, Kilifi-Mbogolo, nan F]	Kenya	Kilifi-Mbogolo	F		C3
AK0069-Ca	AK0069-C	KE	AK0069-Ca [Kenya, Kilifi-Mbogolo, nan F]	Kenya	Kilifi-Mbogolo	F		C3
AK0069-Cb	AK0069-C	KE	AK0069-Cb [Kenya, Kilifi-Mbogolo, nan F]	Kenya	Kilifi-Mbogolo	F		C3
AK0070-Ca	AK0070-C	KE	AK0070-Ca [Kenya, Kilifi-Mbogolo, nan F]	Kenya	Kilifi-Mbogolo	F		C3
AK0070-Cb	AK0070-C	KE	AK0070-Cb [Kenya, Kilifi-Mbogolo, nan F]	Kenya	Kilifi-Mbogolo	F		wt
AK0072-Ca	AK0072-C	KE	AK0072-Ca [Kenya, Kilifi-Mbogolo, nan F]	Kenya	Kilifi-Mbogolo	F		C3
AK0072-Cb	AK0072-C	KE	AK0072-Cb [Kenya, Kilifi-Mbogolo, nan F]	Kenya	Kilifi-Mbogolo	F		C3
AK0073-Ca	AK0073-C	KE	AK0073-Ca [Kenya, Kilifi-Mbogolo, nan F]	Kenya	Kilifi-Mbogolo	F		wt
AK0073-Cb	AK0073-C	KE	AK0073-Cb [Kenya, Kilifi-Mbogolo, nan F]	Kenya	Kilifi-Mbogolo	F		C3
AK0074-Ca	AK0074-C	KE	AK0074-Ca [Kenya, Kilifi-Mbogolo, nan F]	Kenya	Kilifi-Mbogolo	F		C3
AK0074-Cb	AK0074-C	KE	AK0074-Cb [Kenya, Kilifi-Mbogolo, nan F]	Kenya	Kilifi-Mbogolo	F		wt
AK0075-Ca	AK0075-C	KE	AK0075-Ca [Kenya, Kilifi-Mbogolo, nan F]	Kenya	Kilifi-Mbogolo	F		C3
AK0075-Cb	AK0075-C	KE	AK0075-Cb [Kenya, Kilifi-Mbogolo, nan F]	Kenya	Kilifi-Mbogolo	F		wt
AK0076-Ca	AK0076-C	KE	AK0076-Ca [Kenya, Kilifi-Mbogolo, nan F]	Kenya	Kilifi-Mbogolo	F		wt
AK0076-Cb	AK0076-C	KE	AK0076-Cb [Kenya, Kilifi-Mbogolo, nan F]	Kenya	Kilifi-Mbogolo	F		C3
AK0077-Ca	AK0077-C	KE	AK0077-Ca [Kenya, Kilifi-Mbogolo, nan F]	Kenya	Kilifi-Mbogolo	F		wt
AK0077-Cb	AK0077-C	KE	AK0077-Cb [Kenya, Kilifi-Mbogolo, nan F]	Kenya	Kilifi-Mbogolo	F		C3
AK0078-Ca	AK0078-C	KE	AK0078-Ca [Kenya, Kilifi-Mbogolo, nan F]	Kenya	Kilifi-Mbogolo	F		C3
AK0078-Cb	AK0078-C	KE	AK0078-Cb [Kenya, Kilifi-Mbogolo, nan F]	Kenya	Kilifi-Mbogolo	F		C3
AK0079-Ca	AK0079-C	KE	AK0079-Ca [Kenya, Kilifi-Mbogolo, nan F]	Kenya	Kilifi-Mbogolo	F		C3
AK0079-Cb	AK0079-C	KE	AK0079-Cb [Kenya, Kilifi-Mbogolo, nan F]	Kenya	Kilifi-Mbogolo	F		wt
AK0080-Ca	AK0080-C	KE	AK0080-Ca [Kenya, Kilifi-Mbogolo, nan F]	Kenya	Kilifi-Mbogolo	F		wt
AK0080-Cb	AK0080-C	KE	AK0080-Cb [Kenya, Kilifi-Mbogolo, nan F]	Kenya	Kilifi-Mbogolo	F		C3
AK0081-Ca	AK0081-C	KE	AK0081-Ca [Kenya, Kilifi-Mbogolo, nan F]	Kenya	Kilifi-Mbogolo	F		C3
AK0081-Cb	AK0081-C	KE	AK0081-Cb [Kenya, Kilifi-Mbogolo, nan F]	Kenya	Kilifi-Mbogolo	F		wt
AK0082-Ca	AK0082-C	KE	AK0082-Ca [Kenya, Kilifi-Mbogolo, nan F]	Kenya	Kilifi-Mbogolo	F		C3
AK0082-Cb	AK0082-C	KE	AK0082-Cb [Kenya, Kilifi-Mbogolo, nan F]	Kenya	Kilifi-Mbogolo	F		C4
AK0085-Ca	AK0085-C	KE	AK0085-Ca [Kenya, Kilifi-Mbogolo, nan F]	Kenya	Kilifi-Mbogolo	F		wt
AK0085-Cb	AK0085-C	KE	AK0085-Cb [Kenya, Kilifi-Mbogolo, nan F]	Kenya	Kilifi-Mbogolo	F		C3
AK0086-Ca	AK0086-C	KE	AK0086-Ca [Kenya, Kilifi-Mbogolo, nan F]	Kenya	Kilifi-Mbogolo	F		C3
AK0086-Cb	AK0086-C	KE	AK0086-Cb [Kenya, Kilifi-Mbogolo, nan F]	Kenya	Kilifi-Mbogolo	F		C3
AK0087-Ca	AK0087-C	KE	AK0087-Ca [Kenya, Kilifi-Mbogolo, nan F]	Kenya	Kilifi-Mbogolo	F		wt
AK0087-Cb	AK0087-C	KE	AK0087-Cb [Kenya, Kilifi-Mbogolo, nan F]	Kenya	Kilifi-Mbogolo	F		wt
AK0088-Ca	AK0088-C	KE	AK0088-Ca [Kenya, Kilifi-Mbogolo, nan F]	Kenya	Kilifi-Mbogolo	F		C3
AK0088-Cb	AK0088-C	KE	AK0088-Cb [Kenya, Kilifi-Mbogolo, nan F]	Kenya	Kilifi-Mbogolo	F		C4
AK0089-Ca	AK0089-C	KE	AK0089-Ca [Kenya, Kilifi-Mbogolo, nan F]	Kenya	Kilifi-Mbogolo	F		C3
AK0089-Cb	AK0089-C	KE	AK0089-Cb [Kenya, Kilifi-Mbogolo, nan F]	Kenya	Kilifi-Mbogolo	F		C3
AK0090-Ca	AK0090-C	KE	AK0090-Ca [Kenya, Kilifi-Mbogolo, nan F]	Kenya	Kilifi-Mbogolo	F		wt
AK0090-Cb	AK0090-C	KE	AK0090-Cb [Kenya, Kilifi-Mbogolo, nan F]	Kenya	Kilifi-Mbogolo	F		wt
AK0091-Ca	AK0091-C	KE	AK0091-Ca [Kenya, Kilifi-Mbogolo, nan F]	Kenya	Kilifi-Mbogolo	F		wt
AK0091-Cb	AK0091-C	KE	AK0091-Cb [Kenya, Kilifi-Mbogolo, nan F]	Kenya	Kilifi-Mbogolo	F		C3
AK0092-Ca	AK0092-C	KE	AK0092-Ca [Kenya, Kilifi-Mbogolo, nan F]	Kenya	Kilifi-Mbogolo	F		wt
AK0092-Cb	AK0092-C	KE	AK0092-Cb [Kenya, Kilifi-Mbogolo, nan F]	Kenya	Kilifi-Mbogolo	F		wt
AK0093-Ca	AK0093-C	KE	AK0093-Ca [Kenya, Kilifi-Mbogolo, nan F]	Kenya	Kilifi-Mbogolo	F		wt
AK0093-Cb	AK0093-C	KE	AK0093-Cb [Kenya, Kilifi-Mbogolo, nan F]	Kenya	Kilifi-Mbogolo	F		C3
AK0094-Ca	AK0094-C	KE	AK0094-Ca [Kenya, Kilifi-Mbogolo, nan F]	Kenya	Kilifi-Mbogolo	F		C3
AK0094-Cb	AK0094-C	KE	AK0094-Cb [Kenya, Kilifi-Mbogolo, nan F]	Kenya	Kilifi-Mbogolo	F		C3
AK0095-Ca	AK0095-C	KE	AK0095-Ca [Kenya, Kilifi-Mbogolo, nan F]	Kenya	Kilifi-Mbogolo	F		C3
AK0095-Cb	AK0095-C	KE	AK0095-Cb [Kenya, Kilifi-Mbogolo, nan F]	Kenya	Kilifi-Mbogolo	F		wt
AK0096-Ca	AK0096-C	KE	AK0096-Ca [Kenya, Kilifi-Junju, nan F]	Kenya	Kilifi-Junju	F		C3
AK0096-Cb	AK0096-C	KE	AK0096-Cb [Kenya, Kilifi-Junju, nan F]	Kenya	Kilifi-Junju	F		C4
AK0098-Ca	AK0098-C	KE	AK0098-Ca [Kenya, Kilifi-Junju, nan F]	Kenya	Kilifi-Junju	F		C3
AK0098-Cb	AK0098-C	KE	AK0098-Cb [Kenya, Kilifi-Junju, nan F]	Kenya	Kilifi-Junju	F		C3
AK0099-Ca	AK0099-C	KE	AK0099-Ca [Kenya, Kilifi-Junju, nan F]	Kenya	Kilifi-Junju	F		C3
AK0099-Cb	AK0099-C	KE	AK0099-Cb [Kenya, Kilifi-Junju, nan F]	Kenya	Kilifi-Junju	F		wt
AK0100-Ca	AK0100-C	KE	AK0100-Ca [Kenya, Kilifi-Junju, nan F]	Kenya	Kilifi-Junju	F		C4
AK0100-Cb	AK0100-C	KE	AK0100-Cb [Kenya, Kilifi-Junju, nan F]	Kenya	Kilifi-Junju	F		wt
AK0101-Ca	AK0101-C	KE	AK0101-Ca [Kenya, Kilifi-Junju, nan F]	Kenya	Kilifi-Junju	F		C4
AK0101-Cb	AK0101-C	KE	AK0101-Cb [Kenya, Kilifi-Junju, nan F]	Kenya	Kilifi-Junju	F		wt
AK0102-Ca	AK0102-C	KE	AK0102-Ca [Kenya, Kilifi-Junju, nan F]	Kenya	Kilifi-Junju	F		C3
AK0102-Cb	AK0102-C	KE	AK0102-Cb [Kenya, Kilifi-Junju, nan F]	Kenya	Kilifi-Junju	F		C3
AK0103-Ca	AK0103-C	KE	AK0103-Ca [Kenya, Kilifi-Junju, nan F]	Kenya	Kilifi-Junju	F		wt
AK0103-Cb	AK0103-C	KE	AK0103-Cb [Kenya, Kilifi-Junju, nan F]	Kenya	Kilifi-Junju	F		wt
AK0104-Ca	AK0104-C	KE	AK0104-Ca [Kenya, Kilifi-Junju, nan F]	Kenya	Kilifi-Junju	F		C3
AK0104-Cb	AK0104-C	KE	AK0104-Cb [Kenya, Kilifi-Junju, nan F]	Kenya	Kilifi-Junju	F		C4
AK0105-Ca	AK0105-C	KE	AK0105-Ca [Kenya, Kilifi-Junju, nan F]	Kenya	Kilifi-Junju	F		wt
AK0105-Cb	AK0105-C	KE	AK0105-Cb [Kenya, Kilifi-Junju, nan F]	Kenya	Kilifi-Junju	F		C4
AK0106-Ca	AK0106-C	KE	AK0106-Ca [Kenya, Kilifi-Junju, nan F]	Kenya	Kilifi-Junju	F		C3
AK0106-Cb	AK0106-C	KE	AK0106-Cb [Kenya, Kilifi-Junju, nan F]	Kenya	Kilifi-Junju	F		C3
AK0107-Ca	AK0107-C	KE	AK0107-Ca [Kenya, Kilifi-Junju, nan F]	Kenya	Kilifi-Junju	F		wt
AK0107-Cb	AK0107-C	KE	AK0107-Cb [Kenya, Kilifi-Junju, nan F]	Kenya	Kilifi-Junju	F		C3
AK0108-Ca	AK0108-C	KE	AK0108-Ca [Kenya, Kilifi-Junju, nan F]	Kenya	Kilifi-Junju	F		C4
AK0108-Cb	AK0108-C	KE	AK0108-Cb [Kenya, Kilifi-Junju, nan F]	Kenya	Kilifi-Junju	F		C3
AK0109-Ca	AK0109-C	KE	AK0109-Ca [Kenya, Kilifi-Junju, nan F]	Kenya	Kilifi-Junju	F		C3
AK0109-Cb	AK0109-C	KE	AK0109-Cb [Kenya, Kilifi-Junju, nan F]	Kenya	Kilifi-Junju	F		wt
AK0110-Ca	AK0110-C	KE	AK0110-Ca [Kenya, Kilifi-Junju, nan F]	Kenya	Kilifi-Junju	F		C4
AK0110-Cb	AK0110-C	KE	AK0110-Cb [Kenya, Kilifi-Junju, nan F]	Kenya	Kilifi-Junju	F		wt
AK0116-Ca	AK0116-C	KE	AK0116-Ca [Kenya, Kilifi-Mbogolo, nan F]	Kenya	Kilifi-Mbogolo	F		wt
AK0116-Cb	AK0116-C	KE	AK0116-Cb [Kenya, Kilifi-Mbogolo, nan F]	Kenya	Kilifi-Mbogolo	F		wt
AK0117-Ca	AK0117-C	KE	AK0117-Ca [Kenya, Kilifi-Mbogolo, nan F]	Kenya	Kilifi-Mbogolo	F		wt
AK0117-Cb	AK0117-C	KE	AK0117-Cb [Kenya, Kilifi-Mbogolo, nan F]	Kenya	Kilifi-Mbogolo	F		C3
AK0119-Ca	AK0119-C	KE	AK0119-Ca [Kenya, Kilifi-Mbogolo, nan F]	Kenya	Kilifi-Mbogolo	F		wt
AK0119-Cb	AK0119-C	KE	AK0119-Cb [Kenya, Kilifi-Mbogolo, nan F]	Kenya	Kilifi-Mbogolo	F		C4
AK0127-Ca	AK0127-C	KE	AK0127-Ca [Kenya, Kilifi-Mbogolo, nan F]	Kenya	Kilifi-Mbogolo	F		C4
AK0127-Cb	AK0127-C	KE	AK0127-Cb [Kenya, Kilifi-Mbogolo, nan F]	Kenya	Kilifi-Mbogolo	F		C3
AN0007-Ca	AN0007-C	CMgam	AN0007-Ca [Cameroon, Mayos, S F]	Cameroon	Mayos	F	S	wt
AN0007-Cb	AN0007-C	CMgam	AN0007-Cb [Cameroon, Mayos, S F]	Cameroon	Mayos	F	S	wt
AN0008-Ca	AN0008-C	CMgam	AN0008-Ca [Cameroon, Mayos, S F]	Cameroon	Mayos	F	S	wt
AN0008-Cb	AN0008-C	CMgam	AN0008-Cb [Cameroon, Mayos, S F]	Cameroon	Mayos	F	S	wt
AN0009-Ca	AN0009-C	CMgam	AN0009-Ca [Cameroon, Mayos, S F]	Cameroon	Mayos	F	S	wt
AN0009-Cb	AN0009-C	CMgam	AN0009-Cb [Cameroon, Mayos, S F]	Cameroon	Mayos	F	S	wt
AN0010-Ca	AN0010-C	CMgam	AN0010-Ca [Cameroon, Mayos, S F]	Cameroon	Mayos	F	S	wt
AN0010-Cb	AN0010-C	CMgam	AN0010-Cb [Cameroon, Mayos, S F]	Cameroon	Mayos	F	S	wt
AN0011-Ca	AN0011-C	CMgam	AN0011-Ca [Cameroon, Mayos, S F]	Cameroon	Mayos	F	S	wt
AN0011-Cb	AN0011-C	CMgam	AN0011-Cb [Cameroon, Mayos, S F]	Cameroon	Mayos	F	S	wt
AN0012-Ca	AN0012-C	CMgam	AN0012-Ca [Cameroon, Mayos, S F]	Cameroon	Mayos	F	S	wt
AN0012-Cb	AN0012-C	CMgam	AN0012-Cb [Cameroon, Mayos, S F]	Cameroon	Mayos	F	S	wt
AN0013-Ca	AN0013-C	CMgam	AN0013-Ca [Cameroon, Mayos, S F]	Cameroon	Mayos	F	S	wt
AN0013-Cb	AN0013-C	CMgam	AN0013-Cb [Cameroon, Mayos, S F]	Cameroon	Mayos	F	S	wt
AN0014-Ca	AN0014-C	CMgam	AN0014-Ca [Cameroon, Mayos, S F]	Cameroon	Mayos	F	S	wt
AN0014-Cb	AN0014-C	CMgam	AN0014-Cb [Cameroon, Mayos, S F]	Cameroon	Mayos	F	S	wt
AN0015-Ca	AN0015-C	CMgam	AN0015-Ca [Cameroon, Mayos, S F]	Cameroon	Mayos	F	S	wt
AN0015-Cb	AN0015-C	CMgam	AN0015-Cb [Cameroon, Mayos, S F]	Cameroon	Mayos	F	S	wt
AN0016-Ca	AN0016-C	CMgam	AN0016-Ca [Cameroon, Mayos, S F]	Cameroon	Mayos	F	S	wt
AN0016-Cb	AN0016-C	CMgam	AN0016-Cb [Cameroon, Mayos, S F]	Cameroon	Mayos	F	S	wt
AN0017-Ca	AN0017-C	CMgam	AN0017-Ca [Cameroon, Mayos, S F]	Cameroon	Mayos	F	S	wt
AN0017-Cb	AN0017-C	CMgam	AN0017-Cb [Cameroon, Mayos, S F]	Cameroon	Mayos	F	S	wt
AN0018-Ca	AN0018-C	CMgam	AN0018-Ca [Cameroon, Mayos, S F]	Cameroon	Mayos	F	S	wt
AN0018-Cb	AN0018-C	CMgam	AN0018-Cb [Cameroon, Mayos, S F]	Cameroon	Mayos	F	S	wt
AN0019-Ca	AN0019-C	CMgam	AN0019-Ca [Cameroon, Mayos, S F]	Cameroon	Mayos	F	S	wt
AN0019-Cb	AN0019-C	CMgam	AN0019-Cb [Cameroon, Mayos, S F]	Cameroon	Mayos	F	S	wt
AN0020-Ca	AN0020-C	CMgam	AN0020-Ca [Cameroon, Mayos, S F]	Cameroon	Mayos	F	S	wt
AN0020-Cb	AN0020-C	CMgam	AN0020-Cb [Cameroon, Mayos, S F]	Cameroon	Mayos	F	S	wt
AN0022-Ca	AN0022-C	CMgam	AN0022-Ca [Cameroon, Gado-Badzere, S M]	Cameroon	Gado-Badzere	M	S	wt
AN0022-Cb	AN0022-C	CMgam	AN0022-Cb [Cameroon, Gado-Badzere, S M]	Cameroon	Gado-Badzere	M	S	wt
AN0023-Ca	AN0023-C	CMgam	AN0023-Ca [Cameroon, Gado-Badzere, S M]	Cameroon	Gado-Badzere	M	S	wt
AN0023-Cb	AN0023-C	CMgam	AN0023-Cb [Cameroon, Gado-Badzere, S M]	Cameroon	Gado-Badzere	M	S	wt
AN0024-Ca	AN0024-C	CMgam	AN0024-Ca [Cameroon, Gado-Badzere, S M]	Cameroon	Gado-Badzere	M	S	wt
AN0024-Cb	AN0024-C	CMgam	AN0024-Cb [Cameroon, Gado-Badzere, S M]	Cameroon	Gado-Badzere	M	S	wt
AN0025-Ca	AN0025-C	CMgam	AN0025-Ca [Cameroon, Gado-Badzere, S M]	Cameroon	Gado-Badzere	M	S	wt
AN0025-Cb	AN0025-C	CMgam	AN0025-Cb [Cameroon, Gado-Badzere, S M]	Cameroon	Gado-Badzere	M	S	wt
AN0026-Ca	AN0026-C	CMgam	AN0026-Ca [Cameroon, Gado-Badzere, S M]	Cameroon	Gado-Badzere	M	S	wt
AN0026-Cb	AN0026-C	CMgam	AN0026-Cb [Cameroon, Gado-Badzere, S M]	Cameroon	Gado-Badzere	M	S	wt
AN0027-Ca	AN0027-C	CMgam	AN0027-Ca [Cameroon, Gado-Badzere, S M]	Cameroon	Gado-Badzere	M	S	wt
AN0027-Cb	AN0027-C	CMgam	AN0027-Cb [Cameroon, Gado-Badzere, S M]	Cameroon	Gado-Badzere	M	S	wt
AN0028-Ca	AN0028-C	CMgam	AN0028-Ca [Cameroon, Gado-Badzere, S M]	Cameroon	Gado-Badzere	M	S	wt
AN0028-Cb	AN0028-C	CMgam	AN0028-Cb [Cameroon, Gado-Badzere, S M]	Cameroon	Gado-Badzere	M	S	wt
AN0029-Ca	AN0029-C	CMgam	AN0029-Ca [Cameroon, Gado-Badzere, S M]	Cameroon	Gado-Badzere	M	S	wt
AN0029-Cb	AN0029-C	CMgam	AN0029-Cb [Cameroon, Gado-Badzere, S M]	Cameroon	Gado-Badzere	M	S	wt
AN0030-Ca	AN0030-C	CMgam	AN0030-Ca [Cameroon, Gado-Badzere, S M]	Cameroon	Gado-Badzere	M	S	wt
AN0030-Cb	AN0030-C	CMgam	AN0030-Cb [Cameroon, Gado-Badzere, S M]	Cameroon	Gado-Badzere	M	S	wt
AN0031-Ca	AN0031-C	CMgam	AN0031-Ca [Cameroon, Gado-Badzere, S M]	Cameroon	Gado-Badzere	M	S	wt
AN0031-Cb	AN0031-C	CMgam	AN0031-Cb [Cameroon, Gado-Badzere, S M]	Cameroon	Gado-Badzere	M	S	wt
AN0032-Ca	AN0032-C	CMgam	AN0032-Ca [Cameroon, Gado-Badzere, S M]	Cameroon	Gado-Badzere	M	S	wt
AN0032-Cb	AN0032-C	CMgam	AN0032-Cb [Cameroon, Gado-Badzere, S M]	Cameroon	Gado-Badzere	M	S	wt
AN0033-Ca	AN0033-C	CMgam	AN0033-Ca [Cameroon, Gado-Badzere, S M]	Cameroon	Gado-Badzere	M	S	wt
AN0033-Cb	AN0033-C	CMgam	AN0033-Cb [Cameroon, Gado-Badzere, S M]	Cameroon	Gado-Badzere	M	S	wt
AN0034-Ca	AN0034-C	CMgam	AN0034-Ca [Cameroon, Gado-Badzere, S M]	Cameroon	Gado-Badzere	M	S	wt
AN0034-Cb	AN0034-C	CMgam	AN0034-Cb [Cameroon, Gado-Badzere, S M]	Cameroon	Gado-Badzere	M	S	wt
AN0035-Ca	AN0035-C	CMgam	AN0035-Ca [Cameroon, Gado-Badzere, S M]	Cameroon	Gado-Badzere	M	S	wt
AN0035-Cb	AN0035-C	CMgam	AN0035-Cb [Cameroon, Gado-Badzere, S M]	Cameroon	Gado-Badzere	M	S	wt
AN0036-Ca	AN0036-C	CMgam	AN0036-Ca [Cameroon, Gado-Badzere, S M]	Cameroon	Gado-Badzere	M	S	wt
AN0036-Cb	AN0036-C	CMgam	AN0036-Cb [Cameroon, Gado-Badzere, S M]	Cameroon	Gado-Badzere	M	S	wt
AN0037-Ca	AN0037-C	CMgam	AN0037-Ca [Cameroon, Gado-Badzere, S F]	Cameroon	Gado-Badzere	F	S	wt
AN0037-Cb	AN0037-C	CMgam	AN0037-Cb [Cameroon, Gado-Badzere, S F]	Cameroon	Gado-Badzere	F	S	wt
AN0038-Ca	AN0038-C	CMgam	AN0038-Ca [Cameroon, Gado-Badzere, S F]	Cameroon	Gado-Badzere	F	S	wt
AN0038-Cb	AN0038-C	CMgam	AN0038-Cb [Cameroon, Gado-Badzere, S F]	Cameroon	Gado-Badzere	F	S	wt
AN0039-Ca	AN0039-C	CMgam	AN0039-Ca [Cameroon, Gado-Badzere, S F]	Cameroon	Gado-Badzere	F	S	wt
AN0039-Cb	AN0039-C	CMgam	AN0039-Cb [Cameroon, Gado-Badzere, S F]	Cameroon	Gado-Badzere	F	S	wt
AN0040-Ca	AN0040-C	CMgam	AN0040-Ca [Cameroon, Gado-Badzere, S F]	Cameroon	Gado-Badzere	F	S	wt
AN0040-Cb	AN0040-C	CMgam	AN0040-Cb [Cameroon, Gado-Badzere, S F]	Cameroon	Gado-Badzere	F	S	wt
AN0041-Ca	AN0041-C	CMgam	AN0041-Ca [Cameroon, Gado-Badzere, S F]	Cameroon	Gado-Badzere	F	S	wt
AN0041-Cb	AN0041-C	CMgam	AN0041-Cb [Cameroon, Gado-Badzere, S F]	Cameroon	Gado-Badzere	F	S	wt
AN0042-Ca	AN0042-C	CMgam	AN0042-Ca [Cameroon, Gado-Badzere, S F]	Cameroon	Gado-Badzere	F	S	wt
AN0042-Cb	AN0042-C	CMgam	AN0042-Cb [Cameroon, Gado-Badzere, S F]	Cameroon	Gado-Badzere	F	S	wt
AN0043-Ca	AN0043-C	CMgam	AN0043-Ca [Cameroon, Gado-Badzere, S F]	Cameroon	Gado-Badzere	F	S	wt
AN0043-Cb	AN0043-C	CMgam	AN0043-Cb [Cameroon, Gado-Badzere, S F]	Cameroon	Gado-Badzere	F	S	wt
AN0044-Ca	AN0044-C	CMgam	AN0044-Ca [Cameroon, Gado-Badzere, S F]	Cameroon	Gado-Badzere	F	S	wt
AN0044-Cb	AN0044-C	CMgam	AN0044-Cb [Cameroon, Gado-Badzere, S F]	Cameroon	Gado-Badzere	F	S	wt
AN0045-Ca	AN0045-C	CMgam	AN0045-Ca [Cameroon, Gado-Badzere, S F]	Cameroon	Gado-Badzere	F	S	wt
AN0045-Cb	AN0045-C	CMgam	AN0045-Cb [Cameroon, Gado-Badzere, S F]	Cameroon	Gado-Badzere	F	S	wt
AN0046-Ca	AN0046-C	CMgam	AN0046-Ca [Cameroon, Gado-Badzere, S F]	Cameroon	Gado-Badzere	F	S	wt
AN0046-Cb	AN0046-C	CMgam	AN0046-Cb [Cameroon, Gado-Badzere, S F]	Cameroon	Gado-Badzere	F	S	wt
AN0047-Ca	AN0047-C	CMgam	AN0047-Ca [Cameroon, Gado-Badzere, S F]	Cameroon	Gado-Badzere	F	S	wt
AN0047-Cb	AN0047-C	CMgam	AN0047-Cb [Cameroon, Gado-Badzere, S F]	Cameroon	Gado-Badzere	F	S	wt
AN0048-Ca	AN0048-C	CMgam	AN0048-Ca [Cameroon, Gado-Badzere, S F]	Cameroon	Gado-Badzere	F	S	wt
AN0048-Cb	AN0048-C	CMgam	AN0048-Cb [Cameroon, Gado-Badzere, S F]	Cameroon	Gado-Badzere	F	S	wt
AN0049-Ca	AN0049-C	CMgam	AN0049-Ca [Cameroon, Gado-Badzere, S F]	Cameroon	Gado-Badzere	F	S	wt
AN0049-Cb	AN0049-C	CMgam	AN0049-Cb [Cameroon, Gado-Badzere, S F]	Cameroon	Gado-Badzere	F	S	wt
AN0050-Ca	AN0050-C	CMgam	AN0050-Ca [Cameroon, Gado-Badzere, S F]	Cameroon	Gado-Badzere	F	S	wt
AN0050-Cb	AN0050-C	CMgam	AN0050-Cb [Cameroon, Gado-Badzere, S F]	Cameroon	Gado-Badzere	F	S	wt
AN0051-Ca	AN0051-C	CMgam	AN0051-Ca [Cameroon, Gado-Badzere, S F]	Cameroon	Gado-Badzere	F	S	wt
AN0051-Cb	AN0051-C	CMgam	AN0051-Cb [Cameroon, Gado-Badzere, S F]	Cameroon	Gado-Badzere	F	S	wt
AN0053-Ca	AN0053-C	CMgam	AN0053-Ca [Cameroon, Gado-Badzere, S F]	Cameroon	Gado-Badzere	F	S	wt
AN0053-Cb	AN0053-C	CMgam	AN0053-Cb [Cameroon, Gado-Badzere, S F]	Cameroon	Gado-Badzere	F	S	wt
AN0054-Ca	AN0054-C	CMgam	AN0054-Ca [Cameroon, Gado-Badzere, S F]	Cameroon	Gado-Badzere	F	S	wt
AN0054-Cb	AN0054-C	CMgam	AN0054-Cb [Cameroon, Gado-Badzere, S F]	Cameroon	Gado-Badzere	F	S	wt
AN0055-Ca	AN0055-C	CMgam	AN0055-Ca [Cameroon, Gado-Badzere, S F]	Cameroon	Gado-Badzere	F	S	wt
AN0055-Cb	AN0055-C	CMgam	AN0055-Cb [Cameroon, Gado-Badzere, S F]	Cameroon	Gado-Badzere	F	S	wt
AN0056-Ca	AN0056-C	CMgam	AN0056-Ca [Cameroon, Gado-Badzere, S F]	Cameroon	Gado-Badzere	F	S	wt
AN0056-Cb	AN0056-C	CMgam	AN0056-Cb [Cameroon, Gado-Badzere, S F]	Cameroon	Gado-Badzere	F	S	wt
AN0057-Ca	AN0057-C	CMgam	AN0057-Ca [Cameroon, Gado-Badzere, S F]	Cameroon	Gado-Badzere	F	S	wt
AN0057-Cb	AN0057-C	CMgam	AN0057-Cb [Cameroon, Gado-Badzere, S F]	Cameroon	Gado-Badzere	F	S	wt
AN0058-Ca	AN0058-C	CMgam	AN0058-Ca [Cameroon, Gado-Badzere, S F]	Cameroon	Gado-Badzere	F	S	wt
AN0058-Cb	AN0058-C	CMgam	AN0058-Cb [Cameroon, Gado-Badzere, S F]	Cameroon	Gado-Badzere	F	S	wt
AN0059-Ca	AN0059-C	CMgam	AN0059-Ca [Cameroon, Gado-Badzere, S F]	Cameroon	Gado-Badzere	F	S	wt
AN0059-Cb	AN0059-C	CMgam	AN0059-Cb [Cameroon, Gado-Badzere, S F]	Cameroon	Gado-Badzere	F	S	wt
AN0060-Ca	AN0060-C	CMgam	AN0060-Ca [Cameroon, Gado-Badzere, S F]	Cameroon	Gado-Badzere	F	S	wt
AN0060-Cb	AN0060-C	CMgam	AN0060-Cb [Cameroon, Gado-Badzere, S F]	Cameroon	Gado-Badzere	F	S	wt
AN0061-Ca	AN0061-C	CMgam	AN0061-Ca [Cameroon, Zembe-Borongo, S F]	Cameroon	Zembe-Borongo	F	S	wt
AN0061-Cb	AN0061-C	CMgam	AN0061-Cb [Cameroon, Zembe-Borongo, S F]	Cameroon	Zembe-Borongo	F	S	wt
AN0062-Ca	AN0062-C	CMgam	AN0062-Ca [Cameroon, Zembe-Borongo, S F]	Cameroon	Zembe-Borongo	F	S	wt
AN0062-Cb	AN0062-C	CMgam	AN0062-Cb [Cameroon, Zembe-Borongo, S F]	Cameroon	Zembe-Borongo	F	S	wt
AN0063-Ca	AN0063-C	CMgam	AN0063-Ca [Cameroon, Zembe-Borongo, S F]	Cameroon	Zembe-Borongo	F	S	wt
AN0063-Cb	AN0063-C	CMgam	AN0063-Cb [Cameroon, Zembe-Borongo, S F]	Cameroon	Zembe-Borongo	F	S	wt
AN0064-Ca	AN0064-C	CMgam	AN0064-Ca [Cameroon, Zembe-Borongo, S F]	Cameroon	Zembe-Borongo	F	S	wt
AN0064-Cb	AN0064-C	CMgam	AN0064-Cb [Cameroon, Zembe-Borongo, S F]	Cameroon	Zembe-Borongo	F	S	wt
AN0065-Ca	AN0065-C	CMgam	AN0065-Ca [Cameroon, Zembe-Borongo, S F]	Cameroon	Zembe-Borongo	F	S	wt
AN0065-Cb	AN0065-C	CMgam	AN0065-Cb [Cameroon, Zembe-Borongo, S F]	Cameroon	Zembe-Borongo	F	S	wt
AN0066-Ca	AN0066-C	CMgam	AN0066-Ca [Cameroon, Zembe-Borongo, S F]	Cameroon	Zembe-Borongo	F	S	C1
AN0066-Cb	AN0066-C	CMgam	AN0066-Cb [Cameroon, Zembe-Borongo, S F]	Cameroon	Zembe-Borongo	F	S	wt
AN0067-Ca	AN0067-C	CMgam	AN0067-Ca [Cameroon, Zembe-Borongo, S F]	Cameroon	Zembe-Borongo	F	S	wt
AN0067-Cb	AN0067-C	CMgam	AN0067-Cb [Cameroon, Zembe-Borongo, S F]	Cameroon	Zembe-Borongo	F	S	wt
AN0068-Ca	AN0068-C	CMgam	AN0068-Ca [Cameroon, Zembe-Borongo, S F]	Cameroon	Zembe-Borongo	F	S	wt
AN0068-Cb	AN0068-C	CMgam	AN0068-Cb [Cameroon, Zembe-Borongo, S F]	Cameroon	Zembe-Borongo	F	S	wt
AN0069-Ca	AN0069-C	CMgam	AN0069-Ca [Cameroon, Zembe-Borongo, S F]	Cameroon	Zembe-Borongo	F	S	wt
AN0069-Cb	AN0069-C	CMgam	AN0069-Cb [Cameroon, Zembe-Borongo, S F]	Cameroon	Zembe-Borongo	F	S	wt
AN0070-Ca	AN0070-C	CMgam	AN0070-Ca [Cameroon, Zembe-Borongo, S F]	Cameroon	Zembe-Borongo	F	S	wt
AN0070-Cb	AN0070-C	CMgam	AN0070-Cb [Cameroon, Zembe-Borongo, S F]	Cameroon	Zembe-Borongo	F	S	wt
AN0071-Ca	AN0071-C	CMgam	AN0071-Ca [Cameroon, Zembe-Borongo, S F]	Cameroon	Zembe-Borongo	F	S	wt
AN0071-Cb	AN0071-C	CMgam	AN0071-Cb [Cameroon, Zembe-Borongo, S F]	Cameroon	Zembe-Borongo	F	S	wt
AN0072-Ca	AN0072-C	CMgam	AN0072-Ca [Cameroon, Zembe-Borongo, S F]	Cameroon	Zembe-Borongo	F	S	wt
AN0072-Cb	AN0072-C	CMgam	AN0072-Cb [Cameroon, Zembe-Borongo, S F]	Cameroon	Zembe-Borongo	F	S	wt
AN0073-Ca	AN0073-C	CMgam	AN0073-Ca [Cameroon, Zembe-Borongo, S F]	Cameroon	Zembe-Borongo	F	S	wt
AN0073-Cb	AN0073-C	CMgam	AN0073-Cb [Cameroon, Zembe-Borongo, S F]	Cameroon	Zembe-Borongo	F	S	wt
AN0074-Ca	AN0074-C	CMgam	AN0074-Ca [Cameroon, Zembe-Borongo, S F]	Cameroon	Zembe-Borongo	F	S	wt
AN0074-Cb	AN0074-C	CMgam	AN0074-Cb [Cameroon, Zembe-Borongo, S F]	Cameroon	Zembe-Borongo	F	S	wt
AN0075-Ca	AN0075-C	CMgam	AN0075-Ca [Cameroon, Zembe-Borongo, S F]	Cameroon	Zembe-Borongo	F	S	wt
AN0075-Cb	AN0075-C	CMgam	AN0075-Cb [Cameroon, Zembe-Borongo, S F]	Cameroon	Zembe-Borongo	F	S	wt
AN0076-Ca	AN0076-C	CMgam	AN0076-Ca [Cameroon, Zembe-Borongo, S F]	Cameroon	Zembe-Borongo	F	S	wt
AN0076-Cb	AN0076-C	CMgam	AN0076-Cb [Cameroon, Zembe-Borongo, S F]	Cameroon	Zembe-Borongo	F	S	wt
AN0077-Ca	AN0077-C	CMgam	AN0077-Ca [Cameroon, Zembe-Borongo, S F]	Cameroon	Zembe-Borongo	F	S	wt
AN0077-Cb	AN0077-C	CMgam	AN0077-Cb [Cameroon, Zembe-Borongo, S F]	Cameroon	Zembe-Borongo	F	S	wt
AN0079-Ca	AN0079-C	CMgam	AN0079-Ca [Cameroon, Zembe-Borongo, S F]	Cameroon	Zembe-Borongo	F	S	wt
AN0079-Cb	AN0079-C	CMgam	AN0079-Cb [Cameroon, Zembe-Borongo, S F]	Cameroon	Zembe-Borongo	F	S	wt
AN0080-Ca	AN0080-C	CMgam	AN0080-Ca [Cameroon, Zembe-Borongo, S F]	Cameroon	Zembe-Borongo	F	S	C1
AN0080-Cb	AN0080-C	CMgam	AN0080-Cb [Cameroon, Zembe-Borongo, S F]	Cameroon	Zembe-Borongo	F	S	wt
AN0081-Ca	AN0081-C	CMgam	AN0081-Ca [Cameroon, Zembe-Borongo, S F]	Cameroon	Zembe-Borongo	F	S	wt
AN0081-Cb	AN0081-C	CMgam	AN0081-Cb [Cameroon, Zembe-Borongo, S F]	Cameroon	Zembe-Borongo	F	S	wt
AN0082-Ca	AN0082-C	CMgam	AN0082-Ca [Cameroon, Zembe-Borongo, S F]	Cameroon	Zembe-Borongo	F	S	wt
AN0082-Cb	AN0082-C	CMgam	AN0082-Cb [Cameroon, Zembe-Borongo, S F]	Cameroon	Zembe-Borongo	F	S	wt
AN0083-Ca	AN0083-C	CMgam	AN0083-Ca [Cameroon, Zembe-Borongo, S F]	Cameroon	Zembe-Borongo	F	S	wt
AN0083-Cb	AN0083-C	CMgam	AN0083-Cb [Cameroon, Zembe-Borongo, S F]	Cameroon	Zembe-Borongo	F	S	wt
AN0084-Ca	AN0084-C	CMgam	AN0084-Ca [Cameroon, Zembe-Borongo, S F]	Cameroon	Zembe-Borongo	F	S	wt
AN0084-Cb	AN0084-C	CMgam	AN0084-Cb [Cameroon, Zembe-Borongo, S F]	Cameroon	Zembe-Borongo	F	S	wt
AN0085-Ca	AN0085-C	CMgam	AN0085-Ca [Cameroon, Gado-Badzere, S F]	Cameroon	Gado-Badzere	F	S	wt
AN0085-Cb	AN0085-C	CMgam	AN0085-Cb [Cameroon, Gado-Badzere, S F]	Cameroon	Gado-Badzere	F	S	wt
AN0086-Ca	AN0086-C	CMgam	AN0086-Ca [Cameroon, Gado-Badzere, S F]	Cameroon	Gado-Badzere	F	S	wt
AN0086-Cb	AN0086-C	CMgam	AN0086-Cb [Cameroon, Gado-Badzere, S F]	Cameroon	Gado-Badzere	F	S	wt
AN0087-Ca	AN0087-C	CMgam	AN0087-Ca [Cameroon, Gado-Badzere, S F]	Cameroon	Gado-Badzere	F	S	wt
AN0087-Cb	AN0087-C	CMgam	AN0087-Cb [Cameroon, Gado-Badzere, S F]	Cameroon	Gado-Badzere	F	S	wt
AN0088-Ca	AN0088-C	CMgam	AN0088-Ca [Cameroon, Gado-Badzere, S F]	Cameroon	Gado-Badzere	F	S	wt
AN0088-Cb	AN0088-C	CMgam	AN0088-Cb [Cameroon, Gado-Badzere, S F]	Cameroon	Gado-Badzere	F	S	wt
AN0089-Ca	AN0089-C	CMgam	AN0089-Ca [Cameroon, Gado-Badzere, S F]	Cameroon	Gado-Badzere	F	S	wt
AN0089-Cb	AN0089-C	CMgam	AN0089-Cb [Cameroon, Gado-Badzere, S F]	Cameroon	Gado-Badzere	F	S	wt
AN0090-Ca	AN0090-C	CMgam	AN0090-Ca [Cameroon, Gado-Badzere, S F]	Cameroon	Gado-Badzere	F	S	wt
AN0090-Cb	AN0090-C	CMgam	AN0090-Cb [Cameroon, Gado-Badzere, S F]	Cameroon	Gado-Badzere	F	S	wt
AN0091-Ca	AN0091-C	CMgam	AN0091-Ca [Cameroon, Gado-Badzere, S F]	Cameroon	Gado-Badzere	F	S	wt
AN0091-Cb	AN0091-C	CMgam	AN0091-Cb [Cameroon, Gado-Badzere, S F]	Cameroon	Gado-Badzere	F	S	wt
AN0092-Ca	AN0092-C	CMgam	AN0092-Ca [Cameroon, Gado-Badzere, S F]	Cameroon	Gado-Badzere	F	S	wt
AN0092-Cb	AN0092-C	CMgam	AN0092-Cb [Cameroon, Gado-Badzere, S F]	Cameroon	Gado-Badzere	F	S	wt
AN0093-Ca	AN0093-C	CMgam	AN0093-Ca [Cameroon, Gado-Badzere, S F]	Cameroon	Gado-Badzere	F	S	wt
AN0093-Cb	AN0093-C	CMgam	AN0093-Cb [Cameroon, Gado-Badzere, S F]	Cameroon	Gado-Badzere	F	S	wt
AN0094-Ca	AN0094-C	CMgam	AN0094-Ca [Cameroon, Gado-Badzere, S F]	Cameroon	Gado-Badzere	F	S	wt
AN0094-Cb	AN0094-C	CMgam	AN0094-Cb [Cameroon, Gado-Badzere, S F]	Cameroon	Gado-Badzere	F	S	wt
AN0095-Ca	AN0095-C	CMgam	AN0095-Ca [Cameroon, Gado-Badzere, S F]	Cameroon	Gado-Badzere	F	S	wt
AN0095-Cb	AN0095-C	CMgam	AN0095-Cb [Cameroon, Gado-Badzere, S F]	Cameroon	Gado-Badzere	F	S	wt
AN0096-Ca	AN0096-C	CMgam	AN0096-Ca [Cameroon, Gado-Badzere, S F]	Cameroon	Gado-Badzere	F	S	wt
AN0096-Cb	AN0096-C	CMgam	AN0096-Cb [Cameroon, Gado-Badzere, S F]	Cameroon	Gado-Badzere	F	S	wt
AN0097-Ca	AN0097-C	CMgam	AN0097-Ca [Cameroon, Gado-Badzere, S F]	Cameroon	Gado-Badzere	F	S	wt
AN0097-Cb	AN0097-C	CMgam	AN0097-Cb [Cameroon, Gado-Badzere, S F]	Cameroon	Gado-Badzere	F	S	wt
AN0098-Ca	AN0098-C	CMgam	AN0098-Ca [Cameroon, Gado-Badzere, S F]	Cameroon	Gado-Badzere	F	S	wt
AN0098-Cb	AN0098-C	CMgam	AN0098-Cb [Cameroon, Gado-Badzere, S F]	Cameroon	Gado-Badzere	F	S	wt
AN0099-Ca	AN0099-C	CMgam	AN0099-Ca [Cameroon, Gado-Badzere, S F]	Cameroon	Gado-Badzere	F	S	wt
AN0099-Cb	AN0099-C	CMgam	AN0099-Cb [Cameroon, Gado-Badzere, S F]	Cameroon	Gado-Badzere	F	S	wt
AN0100-Ca	AN0100-C	CMgam	AN0100-Ca [Cameroon, Gado-Badzere, S F]	Cameroon	Gado-Badzere	F	S	wt
AN0100-Cb	AN0100-C	CMgam	AN0100-Cb [Cameroon, Gado-Badzere, S F]	Cameroon	Gado-Badzere	F	S	wt
AN0101-Ca	AN0101-C	CMgam	AN0101-Ca [Cameroon, Gado-Badzere, S F]	Cameroon	Gado-Badzere	F	S	wt
AN0101-Cb	AN0101-C	CMgam	AN0101-Cb [Cameroon, Gado-Badzere, S F]	Cameroon	Gado-Badzere	F	S	wt
AN0102-Ca	AN0102-C	CMgam	AN0102-Ca [Cameroon, Gado-Badzere, S F]	Cameroon	Gado-Badzere	F	S	C3
AN0102-Cb	AN0102-C	CMgam	AN0102-Cb [Cameroon, Gado-Badzere, S F]	Cameroon	Gado-Badzere	F	S	wt
AN0103-Ca	AN0103-C	CMgam	AN0103-Ca [Cameroon, Gado-Badzere, S F]	Cameroon	Gado-Badzere	F	S	wt
AN0103-Cb	AN0103-C	CMgam	AN0103-Cb [Cameroon, Gado-Badzere, S F]	Cameroon	Gado-Badzere	F	S	wt
AN0104-Ca	AN0104-C	CMgam	AN0104-Ca [Cameroon, Gado-Badzere, S F]	Cameroon	Gado-Badzere	F	S	wt
AN0104-Cb	AN0104-C	CMgam	AN0104-Cb [Cameroon, Gado-Badzere, S F]	Cameroon	Gado-Badzere	F	S	wt
AN0105-Ca	AN0105-C	CMgam	AN0105-Ca [Cameroon, Gado-Badzere, S F]	Cameroon	Gado-Badzere	F	S	wt
AN0105-Cb	AN0105-C	CMgam	AN0105-Cb [Cameroon, Gado-Badzere, S F]	Cameroon	Gado-Badzere	F	S	wt
AN0106-Ca	AN0106-C	CMgam	AN0106-Ca [Cameroon, Gado-Badzere, S F]	Cameroon	Gado-Badzere	F	S	wt
AN0106-Cb	AN0106-C	CMgam	AN0106-Cb [Cameroon, Gado-Badzere, S F]	Cameroon	Gado-Badzere	F	S	wt
AN0107-Ca	AN0107-C	CMgam	AN0107-Ca [Cameroon, Gado-Badzere, S F]	Cameroon	Gado-Badzere	F	S	wt
AN0107-Cb	AN0107-C	CMgam	AN0107-Cb [Cameroon, Gado-Badzere, S F]	Cameroon	Gado-Badzere	F	S	wt
AN0108-Ca	AN0108-C	CMgam	AN0108-Ca [Cameroon, Gado-Badzere, S F]	Cameroon	Gado-Badzere	F	S	wt
AN0108-Cb	AN0108-C	CMgam	AN0108-Cb [Cameroon, Gado-Badzere, S F]	Cameroon	Gado-Badzere	F	S	wt
AN0109-Ca	AN0109-C	CMgam	AN0109-Ca [Cameroon, Gado-Badzere, S F]	Cameroon	Gado-Badzere	F	S	wt
AN0109-Cb	AN0109-C	CMgam	AN0109-Cb [Cameroon, Gado-Badzere, S F]	Cameroon	Gado-Badzere	F	S	wt
AN0111-Ca	AN0111-C	CMgam	AN0111-Ca [Cameroon, Gado-Badzere, S F]	Cameroon	Gado-Badzere	F	S	wt
AN0111-Cb	AN0111-C	CMgam	AN0111-Cb [Cameroon, Gado-Badzere, S F]	Cameroon	Gado-Badzere	F	S	wt
AN0112-Ca	AN0112-C	CMgam	AN0112-Ca [Cameroon, Gado-Badzere, S F]	Cameroon	Gado-Badzere	F	S	wt
AN0112-Cb	AN0112-C	CMgam	AN0112-Cb [Cameroon, Gado-Badzere, S F]	Cameroon	Gado-Badzere	F	S	wt
AN0113-Ca	AN0113-C	CMgam	AN0113-Ca [Cameroon, Gado-Badzere, S F]	Cameroon	Gado-Badzere	F	S	wt
AN0113-Cb	AN0113-C	CMgam	AN0113-Cb [Cameroon, Gado-Badzere, S F]	Cameroon	Gado-Badzere	F	S	wt
AN0114-Ca	AN0114-C	CMgam	AN0114-Ca [Cameroon, Gado-Badzere, S F]	Cameroon	Gado-Badzere	F	S	wt
AN0114-Cb	AN0114-C	CMgam	AN0114-Cb [Cameroon, Gado-Badzere, S F]	Cameroon	Gado-Badzere	F	S	wt
AN0115-Ca	AN0115-C	CMgam	AN0115-Ca [Cameroon, Gado-Badzere, S F]	Cameroon	Gado-Badzere	F	S	wt
AN0115-Cb	AN0115-C	CMgam	AN0115-Cb [Cameroon, Gado-Badzere, S F]	Cameroon	Gado-Badzere	F	S	wt
AN0117-Ca	AN0117-C	CMgam	AN0117-Ca [Cameroon, Gado-Badzere, S F]	Cameroon	Gado-Badzere	F	S	wt
AN0117-Cb	AN0117-C	CMgam	AN0117-Cb [Cameroon, Gado-Badzere, S F]	Cameroon	Gado-Badzere	F	S	wt
AN0118-Ca	AN0118-C	CMgam	AN0118-Ca [Cameroon, Gado-Badzere, S F]	Cameroon	Gado-Badzere	F	S	wt
AN0118-Cb	AN0118-C	CMgam	AN0118-Cb [Cameroon, Gado-Badzere, S F]	Cameroon	Gado-Badzere	F	S	wt
AN0119-Ca	AN0119-C	CMgam	AN0119-Ca [Cameroon, Gado-Badzere, S F]	Cameroon	Gado-Badzere	F	S	wt
AN0119-Cb	AN0119-C	CMgam	AN0119-Cb [Cameroon, Gado-Badzere, S F]	Cameroon	Gado-Badzere	F	S	wt
AN0120-Ca	AN0120-C	CMgam	AN0120-Ca [Cameroon, Gado-Badzere, S F]	Cameroon	Gado-Badzere	F	S	wt
AN0120-Cb	AN0120-C	CMgam	AN0120-Cb [Cameroon, Gado-Badzere, S F]	Cameroon	Gado-Badzere	F	S	wt
AN0121-Ca	AN0121-C	CMgam	AN0121-Ca [Cameroon, Gado-Badzere, S F]	Cameroon	Gado-Badzere	F	S	wt
AN0121-Cb	AN0121-C	CMgam	AN0121-Cb [Cameroon, Gado-Badzere, S F]	Cameroon	Gado-Badzere	F	S	wt
AN0122-Ca	AN0122-C	CMgam	AN0122-Ca [Cameroon, Mayos, S M]	Cameroon	Mayos	M	S	wt
AN0122-Cb	AN0122-C	CMgam	AN0122-Cb [Cameroon, Mayos, S M]	Cameroon	Mayos	M	S	wt
AN0123-Ca	AN0123-C	CMgam	AN0123-Ca [Cameroon, Mayos, S M]	Cameroon	Mayos	M	S	wt
AN0123-Cb	AN0123-C	CMgam	AN0123-Cb [Cameroon, Mayos, S M]	Cameroon	Mayos	M	S	wt
AN0124-Ca	AN0124-C	CMgam	AN0124-Ca [Cameroon, Mayos, S M]	Cameroon	Mayos	M	S	wt
AN0124-Cb	AN0124-C	CMgam	AN0124-Cb [Cameroon, Mayos, S M]	Cameroon	Mayos	M	S	wt
AN0125-Ca	AN0125-C	CMgam	AN0125-Ca [Cameroon, Mayos, S M]	Cameroon	Mayos	M	S	wt
AN0125-Cb	AN0125-C	CMgam	AN0125-Cb [Cameroon, Mayos, S M]	Cameroon	Mayos	M	S	wt
AN0126-Ca	AN0126-C	CMgam	AN0126-Ca [Cameroon, Mayos, S M]	Cameroon	Mayos	M	S	wt
AN0126-Cb	AN0126-C	CMgam	AN0126-Cb [Cameroon, Mayos, S M]	Cameroon	Mayos	M	S	wt
AN0127-Ca	AN0127-C	CMgam	AN0127-Ca [Cameroon, Mayos, S M]	Cameroon	Mayos	M	S	wt
AN0127-Cb	AN0127-C	CMgam	AN0127-Cb [Cameroon, Mayos, S M]	Cameroon	Mayos	M	S	wt
AN0128-Ca	AN0128-C	CMgam	AN0128-Ca [Cameroon, Mayos, S M]	Cameroon	Mayos	M	S	wt
AN0128-Cb	AN0128-C	CMgam	AN0128-Cb [Cameroon, Mayos, S M]	Cameroon	Mayos	M	S	wt
AN0129-Ca	AN0129-C	CMgam	AN0129-Ca [Cameroon, Mayos, S M]	Cameroon	Mayos	M	S	wt
AN0129-Cb	AN0129-C	CMgam	AN0129-Cb [Cameroon, Mayos, S M]	Cameroon	Mayos	M	S	wt
AN0130-Ca	AN0130-C	CMgam	AN0130-Ca [Cameroon, Mayos, S M]	Cameroon	Mayos	M	S	wt
AN0130-Cb	AN0130-C	CMgam	AN0130-Cb [Cameroon, Mayos, S M]	Cameroon	Mayos	M	S	wt
AN0131-Ca	AN0131-C	CMgam	AN0131-Ca [Cameroon, Mayos, S M]	Cameroon	Mayos	M	S	wt
AN0131-Cb	AN0131-C	CMgam	AN0131-Cb [Cameroon, Mayos, S M]	Cameroon	Mayos	M	S	wt
AN0132-Ca	AN0132-C	CMgam	AN0132-Ca [Cameroon, Mayos, S M]	Cameroon	Mayos	M	S	wt
AN0132-Cb	AN0132-C	CMgam	AN0132-Cb [Cameroon, Mayos, S M]	Cameroon	Mayos	M	S	wt
AN0134-Ca	AN0134-C	CMgam	AN0134-Ca [Cameroon, Mayos, S M]	Cameroon	Mayos	M	S	wt
AN0134-Cb	AN0134-C	CMgam	AN0134-Cb [Cameroon, Mayos, S M]	Cameroon	Mayos	M	S	wt
AN0135-Ca	AN0135-C	CMgam	AN0135-Ca [Cameroon, Mayos, S M]	Cameroon	Mayos	M	S	wt
AN0135-Cb	AN0135-C	CMgam	AN0135-Cb [Cameroon, Mayos, S M]	Cameroon	Mayos	M	S	wt
AN0136-Ca	AN0136-C	CMgam	AN0136-Ca [Cameroon, Mayos, S M]	Cameroon	Mayos	M	S	wt
AN0136-Cb	AN0136-C	CMgam	AN0136-Cb [Cameroon, Mayos, S M]	Cameroon	Mayos	M	S	wt
AN0137-Ca	AN0137-C	CMgam	AN0137-Ca [Cameroon, Mayos, S F]	Cameroon	Mayos	F	S	wt
AN0137-Cb	AN0137-C	CMgam	AN0137-Cb [Cameroon, Mayos, S F]	Cameroon	Mayos	F	S	wt
AN0138-Ca	AN0138-C	CMgam	AN0138-Ca [Cameroon, Mayos, S F]	Cameroon	Mayos	F	S	wt
AN0138-Cb	AN0138-C	CMgam	AN0138-Cb [Cameroon, Mayos, S F]	Cameroon	Mayos	F	S	wt
AN0139-Ca	AN0139-C	CMgam	AN0139-Ca [Cameroon, Mayos, S F]	Cameroon	Mayos	F	S	wt
AN0139-Cb	AN0139-C	CMgam	AN0139-Cb [Cameroon, Mayos, S F]	Cameroon	Mayos	F	S	wt
AN0140-Ca	AN0140-C	CMgam	AN0140-Ca [Cameroon, Mayos, S F]	Cameroon	Mayos	F	S	wt
AN0140-Cb	AN0140-C	CMgam	AN0140-Cb [Cameroon, Mayos, S F]	Cameroon	Mayos	F	S	wt
AN0141-Ca	AN0141-C	CMgam	AN0141-Ca [Cameroon, Mayos, S F]	Cameroon	Mayos	F	S	wt
AN0141-Cb	AN0141-C	CMgam	AN0141-Cb [Cameroon, Mayos, S F]	Cameroon	Mayos	F	S	wt
AN0142-Ca	AN0142-C	CMgam	AN0142-Ca [Cameroon, Mayos, S F]	Cameroon	Mayos	F	S	wt
AN0142-Cb	AN0142-C	CMgam	AN0142-Cb [Cameroon, Mayos, S F]	Cameroon	Mayos	F	S	wt
AN0143-Ca	AN0143-C	CMgam	AN0143-Ca [Cameroon, Mayos, S F]	Cameroon	Mayos	F	S	wt
AN0143-Cb	AN0143-C	CMgam	AN0143-Cb [Cameroon, Mayos, S F]	Cameroon	Mayos	F	S	wt
AN0144-Ca	AN0144-C	CMgam	AN0144-Ca [Cameroon, Mayos, S F]	Cameroon	Mayos	F	S	wt
AN0144-Cb	AN0144-C	CMgam	AN0144-Cb [Cameroon, Mayos, S F]	Cameroon	Mayos	F	S	wt
AN0147-Ca	AN0147-C	CMgam	AN0147-Ca [Cameroon, Mayos, S F]	Cameroon	Mayos	F	S	wt
AN0147-Cb	AN0147-C	CMgam	AN0147-Cb [Cameroon, Mayos, S F]	Cameroon	Mayos	F	S	wt
AN0149-Ca	AN0149-C	CMgam	AN0149-Ca [Cameroon, Mayos, S F]	Cameroon	Mayos	F	S	wt
AN0149-Cb	AN0149-C	CMgam	AN0149-Cb [Cameroon, Mayos, S F]	Cameroon	Mayos	F	S	wt
AN0151-Ca	AN0151-C	CMgam	AN0151-Ca [Cameroon, Mayos, S F]	Cameroon	Mayos	F	S	wt
AN0151-Cb	AN0151-C	CMgam	AN0151-Cb [Cameroon, Mayos, S F]	Cameroon	Mayos	F	S	wt
AN0152-Ca	AN0152-C	CMgam	AN0152-Ca [Cameroon, Mayos, S F]	Cameroon	Mayos	F	S	wt
AN0152-Cb	AN0152-C	CMgam	AN0152-Cb [Cameroon, Mayos, S F]	Cameroon	Mayos	F	S	wt
AN0153-Ca	AN0153-C	CMgam	AN0153-Ca [Cameroon, Mayos, S F]	Cameroon	Mayos	F	S	wt
AN0153-Cb	AN0153-C	CMgam	AN0153-Cb [Cameroon, Mayos, S F]	Cameroon	Mayos	F	S	wt
AN0154-Ca	AN0154-C	CMgam	AN0154-Ca [Cameroon, Mayos, S F]	Cameroon	Mayos	F	S	wt
AN0154-Cb	AN0154-C	CMgam	AN0154-Cb [Cameroon, Mayos, S F]	Cameroon	Mayos	F	S	wt
AN0155-Ca	AN0155-C	CMgam	AN0155-Ca [Cameroon, Mayos, S F]	Cameroon	Mayos	F	S	wt
AN0155-Cb	AN0155-C	CMgam	AN0155-Cb [Cameroon, Mayos, S F]	Cameroon	Mayos	F	S	wt
AN0156-Ca	AN0156-C	CMgam	AN0156-Ca [Cameroon, Mayos, S F]	Cameroon	Mayos	F	S	wt
AN0156-Cb	AN0156-C	CMgam	AN0156-Cb [Cameroon, Mayos, S F]	Cameroon	Mayos	F	S	wt
AN0157-Ca	AN0157-C	CMgam	AN0157-Ca [Cameroon, Mayos, S F]	Cameroon	Mayos	F	S	wt
AN0157-Cb	AN0157-C	CMgam	AN0157-Cb [Cameroon, Mayos, S F]	Cameroon	Mayos	F	S	wt
AN0158-Ca	AN0158-C	CMgam	AN0158-Ca [Cameroon, Mayos, S F]	Cameroon	Mayos	F	S	wt
AN0158-Cb	AN0158-C	CMgam	AN0158-Cb [Cameroon, Mayos, S F]	Cameroon	Mayos	F	S	wt
AN0159-Ca	AN0159-C	CMgam	AN0159-Ca [Cameroon, Mayos, S F]	Cameroon	Mayos	F	S	wt
AN0159-Cb	AN0159-C	CMgam	AN0159-Cb [Cameroon, Mayos, S F]	Cameroon	Mayos	F	S	wt
AN0160-Ca	AN0160-C	CMgam	AN0160-Ca [Cameroon, Mayos, S F]	Cameroon	Mayos	F	S	wt
AN0160-Cb	AN0160-C	CMgam	AN0160-Cb [Cameroon, Mayos, S F]	Cameroon	Mayos	F	S	wt
AN0162-Ca	AN0162-C	CMgam	AN0162-Ca [Cameroon, Mayos, S F]	Cameroon	Mayos	F	S	wt
AN0162-Cb	AN0162-C	CMgam	AN0162-Cb [Cameroon, Mayos, S F]	Cameroon	Mayos	F	S	wt
AN0163-Ca	AN0163-C	CMgam	AN0163-Ca [Cameroon, Mayos, S F]	Cameroon	Mayos	F	S	wt
AN0163-Cb	AN0163-C	CMgam	AN0163-Cb [Cameroon, Mayos, S F]	Cameroon	Mayos	F	S	wt
AN0164-Ca	AN0164-C	CMgam	AN0164-Ca [Cameroon, Mayos, S F]	Cameroon	Mayos	F	S	wt
AN0164-Cb	AN0164-C	CMgam	AN0164-Cb [Cameroon, Mayos, S F]	Cameroon	Mayos	F	S	wt
AN0165-Ca	AN0165-C	CMgam	AN0165-Ca [Cameroon, Mayos, S F]	Cameroon	Mayos	F	S	C4
AN0165-Cb	AN0165-C	CMgam	AN0165-Cb [Cameroon, Mayos, S F]	Cameroon	Mayos	F	S	wt
AN0166-Ca	AN0166-C	CMgam	AN0166-Ca [Cameroon, Mayos, S F]	Cameroon	Mayos	F	S	wt
AN0166-Cb	AN0166-C	CMgam	AN0166-Cb [Cameroon, Mayos, S F]	Cameroon	Mayos	F	S	wt
AN0167-Ca	AN0167-C	CMgam	AN0167-Ca [Cameroon, Mayos, S F]	Cameroon	Mayos	F	S	wt
AN0167-Cb	AN0167-C	CMgam	AN0167-Cb [Cameroon, Mayos, S F]	Cameroon	Mayos	F	S	wt
AN0168-Ca	AN0168-C	CMgam	AN0168-Ca [Cameroon, Mayos, S F]	Cameroon	Mayos	F	S	wt
AN0168-Cb	AN0168-C	CMgam	AN0168-Cb [Cameroon, Mayos, S F]	Cameroon	Mayos	F	S	wt
AN0169-Ca	AN0169-C	CMgam	AN0169-Ca [Cameroon, Mayos, S F]	Cameroon	Mayos	F	S	wt
AN0169-Cb	AN0169-C	CMgam	AN0169-Cb [Cameroon, Mayos, S F]	Cameroon	Mayos	F	S	wt
AN0170-Ca	AN0170-C	CMgam	AN0170-Ca [Cameroon, Mayos, S F]	Cameroon	Mayos	F	S	wt
AN0170-Cb	AN0170-C	CMgam	AN0170-Cb [Cameroon, Mayos, S F]	Cameroon	Mayos	F	S	C2
AN0171-Ca	AN0171-C	CMgam	AN0171-Ca [Cameroon, Mayos, S F]	Cameroon	Mayos	F	S	wt
AN0171-Cb	AN0171-C	CMgam	AN0171-Cb [Cameroon, Mayos, S F]	Cameroon	Mayos	F	S	wt
AN0172-Ca	AN0172-C	CMgam	AN0172-Ca [Cameroon, Mayos, S F]	Cameroon	Mayos	F	S	wt
AN0172-Cb	AN0172-C	CMgam	AN0172-Cb [Cameroon, Mayos, S F]	Cameroon	Mayos	F	S	wt
AN0173-Ca	AN0173-C	CMgam	AN0173-Ca [Cameroon, Mayos, S F]	Cameroon	Mayos	F	S	wt
AN0173-Cb	AN0173-C	CMgam	AN0173-Cb [Cameroon, Mayos, S F]	Cameroon	Mayos	F	S	wt
AN0174-Ca	AN0174-C	CMgam	AN0174-Ca [Cameroon, Mayos, S F]	Cameroon	Mayos	F	S	wt
AN0174-Cb	AN0174-C	CMgam	AN0174-Cb [Cameroon, Mayos, S F]	Cameroon	Mayos	F	S	wt
AN0175-Ca	AN0175-C	CMgam	AN0175-Ca [Cameroon, Mayos, S F]	Cameroon	Mayos	F	S	wt
AN0175-Cb	AN0175-C	CMgam	AN0175-Cb [Cameroon, Mayos, S F]	Cameroon	Mayos	F	S	wt
AN0176-Ca	AN0176-C	CMgam	AN0176-Ca [Cameroon, Mayos, S F]	Cameroon	Mayos	F	S	wt
AN0176-Cb	AN0176-C	CMgam	AN0176-Cb [Cameroon, Mayos, S F]	Cameroon	Mayos	F	S	wt
AN0177-Ca	AN0177-C	CMgam	AN0177-Ca [Cameroon, Mayos, S F]	Cameroon	Mayos	F	S	wt
AN0177-Cb	AN0177-C	CMgam	AN0177-Cb [Cameroon, Mayos, S F]	Cameroon	Mayos	F	S	wt
AN0178-Ca	AN0178-C	CMgam	AN0178-Ca [Cameroon, Mayos, S F]	Cameroon	Mayos	F	S	wt
AN0178-Cb	AN0178-C	CMgam	AN0178-Cb [Cameroon, Mayos, S F]	Cameroon	Mayos	F	S	wt
AN0179-Ca	AN0179-C	CMgam	AN0179-Ca [Cameroon, Mayos, S F]	Cameroon	Mayos	F	S	wt
AN0179-Cb	AN0179-C	CMgam	AN0179-Cb [Cameroon, Mayos, S F]	Cameroon	Mayos	F	S	wt
AN0180-Ca	AN0180-C	CMgam	AN0180-Ca [Cameroon, Mayos, S F]	Cameroon	Mayos	F	S	wt
AN0180-Cb	AN0180-C	CMgam	AN0180-Cb [Cameroon, Mayos, S F]	Cameroon	Mayos	F	S	C2
AN0181-Ca	AN0181-C	CMgam	AN0181-Ca [Cameroon, Mayos, S F]	Cameroon	Mayos	F	S	wt
AN0181-Cb	AN0181-C	CMgam	AN0181-Cb [Cameroon, Mayos, S F]	Cameroon	Mayos	F	S	wt
AN0182-Ca	AN0182-C	CMgam	AN0182-Ca [Cameroon, Mayos, S F]	Cameroon	Mayos	F	S	wt
AN0182-Cb	AN0182-C	CMgam	AN0182-Cb [Cameroon, Mayos, S F]	Cameroon	Mayos	F	S	wt
AN0183-Ca	AN0183-C	CMgam	AN0183-Ca [Cameroon, Mayos, S F]	Cameroon	Mayos	F	S	wt
AN0183-Cb	AN0183-C	CMgam	AN0183-Cb [Cameroon, Mayos, S F]	Cameroon	Mayos	F	S	wt
AN0184-Ca	AN0184-C	CMgam	AN0184-Ca [Cameroon, Mayos, S F]	Cameroon	Mayos	F	S	wt
AN0184-Cb	AN0184-C	CMgam	AN0184-Cb [Cameroon, Mayos, S F]	Cameroon	Mayos	F	S	wt
AN0185-Ca	AN0185-C	CMgam	AN0185-Ca [Cameroon, Mayos, S F]	Cameroon	Mayos	F	S	wt
AN0185-Cb	AN0185-C	CMgam	AN0185-Cb [Cameroon, Mayos, S F]	Cameroon	Mayos	F	S	wt
AN0186-Ca	AN0186-C	CMgam	AN0186-Ca [Cameroon, Mayos, S F]	Cameroon	Mayos	F	S	wt
AN0186-Cb	AN0186-C	CMgam	AN0186-Cb [Cameroon, Mayos, S F]	Cameroon	Mayos	F	S	wt
AN0187-Ca	AN0187-C	CMgam	AN0187-Ca [Cameroon, Mayos, S F]	Cameroon	Mayos	F	S	wt
AN0187-Cb	AN0187-C	CMgam	AN0187-Cb [Cameroon, Mayos, S F]	Cameroon	Mayos	F	S	wt
AN0188-Ca	AN0188-C	CMgam	AN0188-Ca [Cameroon, Mayos, S F]	Cameroon	Mayos	F	S	wt
AN0188-Cb	AN0188-C	CMgam	AN0188-Cb [Cameroon, Mayos, S F]	Cameroon	Mayos	F	S	wt
AN0189-Ca	AN0189-C	CMgam	AN0189-Ca [Cameroon, Mayos, S F]	Cameroon	Mayos	F	S	wt
AN0189-Cb	AN0189-C	CMgam	AN0189-Cb [Cameroon, Mayos, S F]	Cameroon	Mayos	F	S	wt
AN0190-Ca	AN0190-C	CMgam	AN0190-Ca [Cameroon, Mayos, S F]	Cameroon	Mayos	F	S	wt
AN0190-Cb	AN0190-C	CMgam	AN0190-Cb [Cameroon, Mayos, S F]	Cameroon	Mayos	F	S	wt
AN0191-Ca	AN0191-C	CMgam	AN0191-Ca [Cameroon, Mayos, S F]	Cameroon	Mayos	F	S	wt
AN0191-Cb	AN0191-C	CMgam	AN0191-Cb [Cameroon, Mayos, S F]	Cameroon	Mayos	F	S	wt
AN0192-Ca	AN0192-C	CMgam	AN0192-Ca [Cameroon, Mayos, S F]	Cameroon	Mayos	F	S	wt
AN0192-Cb	AN0192-C	CMgam	AN0192-Cb [Cameroon, Mayos, S F]	Cameroon	Mayos	F	S	wt
AN0193-Ca	AN0193-C	CMgam	AN0193-Ca [Cameroon, Mayos, S F]	Cameroon	Mayos	F	S	wt
AN0193-Cb	AN0193-C	CMgam	AN0193-Cb [Cameroon, Mayos, S F]	Cameroon	Mayos	F	S	wt
AN0194-Ca	AN0194-C	CMgam	AN0194-Ca [Cameroon, Mayos, S F]	Cameroon	Mayos	F	S	wt
AN0194-Cb	AN0194-C	CMgam	AN0194-Cb [Cameroon, Mayos, S F]	Cameroon	Mayos	F	S	wt
AN0196-Ca	AN0196-C	CMgam	AN0196-Ca [Cameroon, Mayos, S F]	Cameroon	Mayos	F	S	wt
AN0196-Cb	AN0196-C	CMgam	AN0196-Cb [Cameroon, Mayos, S F]	Cameroon	Mayos	F	S	wt
AN0197-Ca	AN0197-C	CMgam	AN0197-Ca [Cameroon, Mayos, S F]	Cameroon	Mayos	F	S	wt
AN0197-Cb	AN0197-C	CMgam	AN0197-Cb [Cameroon, Mayos, S F]	Cameroon	Mayos	F	S	wt
AN0198-Ca	AN0198-C	CMgam	AN0198-Ca [Cameroon, Mayos, S F]	Cameroon	Mayos	F	S	wt
AN0198-Cb	AN0198-C	CMgam	AN0198-Cb [Cameroon, Mayos, S F]	Cameroon	Mayos	F	S	wt
AN0199-Ca	AN0199-C	CMgam	AN0199-Ca [Cameroon, Mayos, S F]	Cameroon	Mayos	F	S	wt
AN0199-Cb	AN0199-C	CMgam	AN0199-Cb [Cameroon, Mayos, S F]	Cameroon	Mayos	F	S	wt
AN0200-Ca	AN0200-C	CMgam	AN0200-Ca [Cameroon, Mayos, S F]	Cameroon	Mayos	F	S	wt
AN0200-Cb	AN0200-C	CMgam	AN0200-Cb [Cameroon, Mayos, S F]	Cameroon	Mayos	F	S	wt
AN0201-Ca	AN0201-C	CMgam	AN0201-Ca [Cameroon, Mayos, S F]	Cameroon	Mayos	F	S	wt
AN0201-Cb	AN0201-C	CMgam	AN0201-Cb [Cameroon, Mayos, S F]	Cameroon	Mayos	F	S	wt
AN0202-Ca	AN0202-C	CMgam	AN0202-Ca [Cameroon, Mayos, S F]	Cameroon	Mayos	F	S	wt
AN0202-Cb	AN0202-C	CMgam	AN0202-Cb [Cameroon, Mayos, S F]	Cameroon	Mayos	F	S	wt
AN0203-Ca	AN0203-C	CMgam	AN0203-Ca [Cameroon, Mayos, S F]	Cameroon	Mayos	F	S	wt
AN0203-Cb	AN0203-C	CMgam	AN0203-Cb [Cameroon, Mayos, S F]	Cameroon	Mayos	F	S	wt
AN0204-Ca	AN0204-C	CMgam	AN0204-Ca [Cameroon, Mayos, S F]	Cameroon	Mayos	F	S	wt
AN0204-Cb	AN0204-C	CMgam	AN0204-Cb [Cameroon, Mayos, S F]	Cameroon	Mayos	F	S	wt
AN0205-Ca	AN0205-C	CMgam	AN0205-Ca [Cameroon, Mayos, S F]	Cameroon	Mayos	F	S	wt
AN0205-Cb	AN0205-C	CMgam	AN0205-Cb [Cameroon, Mayos, S F]	Cameroon	Mayos	F	S	wt
AN0206-Ca	AN0206-C	CMgam	AN0206-Ca [Cameroon, Mayos, S F]	Cameroon	Mayos	F	S	wt
AN0206-Cb	AN0206-C	CMgam	AN0206-Cb [Cameroon, Mayos, S F]	Cameroon	Mayos	F	S	wt
AN0207-Ca	AN0207-C	CMgam	AN0207-Ca [Cameroon, Mayos, S F]	Cameroon	Mayos	F	S	wt
AN0207-Cb	AN0207-C	CMgam	AN0207-Cb [Cameroon, Mayos, S F]	Cameroon	Mayos	F	S	wt
AN0208-Ca	AN0208-C	CMgam	AN0208-Ca [Cameroon, Mayos, S F]	Cameroon	Mayos	F	S	wt
AN0208-Cb	AN0208-C	CMgam	AN0208-Cb [Cameroon, Mayos, S F]	Cameroon	Mayos	F	S	wt
AN0209-Ca	AN0209-C	CMgam	AN0209-Ca [Cameroon, Mayos, S F]	Cameroon	Mayos	F	S	wt
AN0209-Cb	AN0209-C	CMgam	AN0209-Cb [Cameroon, Mayos, S F]	Cameroon	Mayos	F	S	wt
AN0210-Ca	AN0210-C	CMgam	AN0210-Ca [Cameroon, Mayos, S F]	Cameroon	Mayos	F	S	wt
AN0210-Cb	AN0210-C	CMgam	AN0210-Cb [Cameroon, Mayos, S F]	Cameroon	Mayos	F	S	wt
AN0212-Ca	AN0212-C	CMgam	AN0212-Ca [Cameroon, Mayos, S F]	Cameroon	Mayos	F	S	wt
AN0212-Cb	AN0212-C	CMgam	AN0212-Cb [Cameroon, Mayos, S F]	Cameroon	Mayos	F	S	wt
AN0213-Ca	AN0213-C	CMgam	AN0213-Ca [Cameroon, Mayos, S F]	Cameroon	Mayos	F	S	wt
AN0213-Cb	AN0213-C	CMgam	AN0213-Cb [Cameroon, Mayos, S F]	Cameroon	Mayos	F	S	wt
AN0214-Ca	AN0214-C	CMgam	AN0214-Ca [Cameroon, Mayos, S F]	Cameroon	Mayos	F	S	wt
AN0214-Cb	AN0214-C	CMgam	AN0214-Cb [Cameroon, Mayos, S F]	Cameroon	Mayos	F	S	wt
AN0215-Ca	AN0215-C	CMgam	AN0215-Ca [Cameroon, Mayos, S F]	Cameroon	Mayos	F	S	wt
AN0215-Cb	AN0215-C	CMgam	AN0215-Cb [Cameroon, Mayos, S F]	Cameroon	Mayos	F	S	wt
AN0217-Ca	AN0217-C	CMgam	AN0217-Ca [Cameroon, Mayos, S F]	Cameroon	Mayos	F	S	wt
AN0217-Cb	AN0217-C	CMgam	AN0217-Cb [Cameroon, Mayos, S F]	Cameroon	Mayos	F	S	wt
AN0218-Ca	AN0218-C	CMgam	AN0218-Ca [Cameroon, Mayos, S F]	Cameroon	Mayos	F	S	wt
AN0218-Cb	AN0218-C	CMgam	AN0218-Cb [Cameroon, Mayos, S F]	Cameroon	Mayos	F	S	wt
AN0219-Ca	AN0219-C	CMgam	AN0219-Ca [Cameroon, Mayos, S F]	Cameroon	Mayos	F	S	wt
AN0219-Cb	AN0219-C	CMgam	AN0219-Cb [Cameroon, Mayos, S F]	Cameroon	Mayos	F	S	wt
AN0220-Ca	AN0220-C	CMgam	AN0220-Ca [Cameroon, Mayos, S F]	Cameroon	Mayos	F	S	wt
AN0220-Cb	AN0220-C	CMgam	AN0220-Cb [Cameroon, Mayos, S F]	Cameroon	Mayos	F	S	wt
AN0221-Ca	AN0221-C	CMgam	AN0221-Ca [Cameroon, Mayos, S F]	Cameroon	Mayos	F	S	wt
AN0221-Cb	AN0221-C	CMgam	AN0221-Cb [Cameroon, Mayos, S F]	Cameroon	Mayos	F	S	C4
AN0222-Ca	AN0222-C	CMgam	AN0222-Ca [Cameroon, Daiguene, S M]	Cameroon	Daiguene	M	S	wt
AN0222-Cb	AN0222-C	CMgam	AN0222-Cb [Cameroon, Daiguene, S M]	Cameroon	Daiguene	M	S	wt
AN0223-Ca	AN0223-C	CMgam	AN0223-Ca [Cameroon, Daiguene, S M]	Cameroon	Daiguene	M	S	wt
AN0223-Cb	AN0223-C	CMgam	AN0223-Cb [Cameroon, Daiguene, S M]	Cameroon	Daiguene	M	S	wt
AN0224-Ca	AN0224-C	CMgam	AN0224-Ca [Cameroon, Daiguene, S M]	Cameroon	Daiguene	M	S	wt
AN0224-Cb	AN0224-C	CMgam	AN0224-Cb [Cameroon, Daiguene, S M]	Cameroon	Daiguene	M	S	wt
AN0225-Ca	AN0225-C	CMgam	AN0225-Ca [Cameroon, Daiguene, S M]	Cameroon	Daiguene	M	S	wt
AN0225-Cb	AN0225-C	CMgam	AN0225-Cb [Cameroon, Daiguene, S M]	Cameroon	Daiguene	M	S	wt
AN0226-Ca	AN0226-C	CMgam	AN0226-Ca [Cameroon, Daiguene, S M]	Cameroon	Daiguene	M	S	wt
AN0226-Cb	AN0226-C	CMgam	AN0226-Cb [Cameroon, Daiguene, S M]	Cameroon	Daiguene	M	S	wt
AN0227-Ca	AN0227-C	CMgam	AN0227-Ca [Cameroon, Daiguene, S M]	Cameroon	Daiguene	M	S	wt
AN0227-Cb	AN0227-C	CMgam	AN0227-Cb [Cameroon, Daiguene, S M]	Cameroon	Daiguene	M	S	wt
AN0228-Ca	AN0228-C	CMgam	AN0228-Ca [Cameroon, Daiguene, S M]	Cameroon	Daiguene	M	S	wt
AN0228-Cb	AN0228-C	CMgam	AN0228-Cb [Cameroon, Daiguene, S M]	Cameroon	Daiguene	M	S	wt
AN0229-Ca	AN0229-C	CMgam	AN0229-Ca [Cameroon, Daiguene, S M]	Cameroon	Daiguene	M	S	wt
AN0229-Cb	AN0229-C	CMgam	AN0229-Cb [Cameroon, Daiguene, S M]	Cameroon	Daiguene	M	S	wt
AN0230-Ca	AN0230-C	CMgam	AN0230-Ca [Cameroon, Daiguene, S M]	Cameroon	Daiguene	M	S	wt
AN0230-Cb	AN0230-C	CMgam	AN0230-Cb [Cameroon, Daiguene, S M]	Cameroon	Daiguene	M	S	wt
AN0231-Ca	AN0231-C	CMgam	AN0231-Ca [Cameroon, Daiguene, S M]	Cameroon	Daiguene	M	S	wt
AN0231-Cb	AN0231-C	CMgam	AN0231-Cb [Cameroon, Daiguene, S M]	Cameroon	Daiguene	M	S	wt
AN0232-Ca	AN0232-C	CMgam	AN0232-Ca [Cameroon, Daiguene, S M]	Cameroon	Daiguene	M	S	wt
AN0232-Cb	AN0232-C	CMgam	AN0232-Cb [Cameroon, Daiguene, S M]	Cameroon	Daiguene	M	S	wt
AN0233-Ca	AN0233-C	CMgam	AN0233-Ca [Cameroon, Daiguene, S M]	Cameroon	Daiguene	M	S	wt
AN0233-Cb	AN0233-C	CMgam	AN0233-Cb [Cameroon, Daiguene, S M]	Cameroon	Daiguene	M	S	wt
AN0234-Ca	AN0234-C	CMgam	AN0234-Ca [Cameroon, Daiguene, S M]	Cameroon	Daiguene	M	S	wt
AN0234-Cb	AN0234-C	CMgam	AN0234-Cb [Cameroon, Daiguene, S M]	Cameroon	Daiguene	M	S	wt
AN0235-Ca	AN0235-C	CMgam	AN0235-Ca [Cameroon, Daiguene, S M]	Cameroon	Daiguene	M	S	wt
AN0235-Cb	AN0235-C	CMgam	AN0235-Cb [Cameroon, Daiguene, S M]	Cameroon	Daiguene	M	S	wt
AN0236-Ca	AN0236-C	CMgam	AN0236-Ca [Cameroon, Daiguene, S M]	Cameroon	Daiguene	M	S	wt
AN0236-Cb	AN0236-C	CMgam	AN0236-Cb [Cameroon, Daiguene, S M]	Cameroon	Daiguene	M	S	wt
AN0237-Ca	AN0237-C	CMgam	AN0237-Ca [Cameroon, Daiguene, S F]	Cameroon	Daiguene	F	S	wt
AN0237-Cb	AN0237-C	CMgam	AN0237-Cb [Cameroon, Daiguene, S F]	Cameroon	Daiguene	F	S	wt
AN0238-Ca	AN0238-C	CMgam	AN0238-Ca [Cameroon, Daiguene, S F]	Cameroon	Daiguene	F	S	wt
AN0238-Cb	AN0238-C	CMgam	AN0238-Cb [Cameroon, Daiguene, S F]	Cameroon	Daiguene	F	S	wt
AN0239-Ca	AN0239-C	CMgam	AN0239-Ca [Cameroon, Daiguene, S F]	Cameroon	Daiguene	F	S	wt
AN0239-Cb	AN0239-C	CMgam	AN0239-Cb [Cameroon, Daiguene, S F]	Cameroon	Daiguene	F	S	wt
AN0240-Ca	AN0240-C	CMgam	AN0240-Ca [Cameroon, Daiguene, S F]	Cameroon	Daiguene	F	S	wt
AN0240-Cb	AN0240-C	CMgam	AN0240-Cb [Cameroon, Daiguene, S F]	Cameroon	Daiguene	F	S	wt
AN0241-Ca	AN0241-C	CMgam	AN0241-Ca [Cameroon, Daiguene, S F]	Cameroon	Daiguene	F	S	wt
AN0241-Cb	AN0241-C	CMgam	AN0241-Cb [Cameroon, Daiguene, S F]	Cameroon	Daiguene	F	S	wt
AN0242-Ca	AN0242-C	CMgam	AN0242-Ca [Cameroon, Daiguene, S F]	Cameroon	Daiguene	F	S	wt
AN0242-Cb	AN0242-C	CMgam	AN0242-Cb [Cameroon, Daiguene, S F]	Cameroon	Daiguene	F	S	wt
AN0243-Ca	AN0243-C	CMgam	AN0243-Ca [Cameroon, Daiguene, S F]	Cameroon	Daiguene	F	S	wt
AN0243-Cb	AN0243-C	CMgam	AN0243-Cb [Cameroon, Daiguene, S F]	Cameroon	Daiguene	F	S	wt
AN0244-Ca	AN0244-C	CMgam	AN0244-Ca [Cameroon, Daiguene, S F]	Cameroon	Daiguene	F	S	wt
AN0244-Cb	AN0244-C	CMgam	AN0244-Cb [Cameroon, Daiguene, S F]	Cameroon	Daiguene	F	S	C3
AN0245-Ca	AN0245-C	CMgam	AN0245-Ca [Cameroon, Daiguene, S F]	Cameroon	Daiguene	F	S	wt
AN0245-Cb	AN0245-C	CMgam	AN0245-Cb [Cameroon, Daiguene, S F]	Cameroon	Daiguene	F	S	wt
AN0246-Ca	AN0246-C	CMgam	AN0246-Ca [Cameroon, Daiguene, S F]	Cameroon	Daiguene	F	S	wt
AN0246-Cb	AN0246-C	CMgam	AN0246-Cb [Cameroon, Daiguene, S F]	Cameroon	Daiguene	F	S	wt
AN0247-Ca	AN0247-C	CMgam	AN0247-Ca [Cameroon, Daiguene, S F]	Cameroon	Daiguene	F	S	wt
AN0247-Cb	AN0247-C	CMgam	AN0247-Cb [Cameroon, Daiguene, S F]	Cameroon	Daiguene	F	S	wt
AN0248-Ca	AN0248-C	CMgam	AN0248-Ca [Cameroon, Daiguene, S F]	Cameroon	Daiguene	F	S	wt
AN0248-Cb	AN0248-C	CMgam	AN0248-Cb [Cameroon, Daiguene, S F]	Cameroon	Daiguene	F	S	wt
AN0250-Ca	AN0250-C	CMgam	AN0250-Ca [Cameroon, Daiguene, S F]	Cameroon	Daiguene	F	S	wt
AN0250-Cb	AN0250-C	CMgam	AN0250-Cb [Cameroon, Daiguene, S F]	Cameroon	Daiguene	F	S	wt
AN0251-Ca	AN0251-C	CMgam	AN0251-Ca [Cameroon, Daiguene, S F]	Cameroon	Daiguene	F	S	wt
AN0251-Cb	AN0251-C	CMgam	AN0251-Cb [Cameroon, Daiguene, S F]	Cameroon	Daiguene	F	S	wt
AN0252-Ca	AN0252-C	CMgam	AN0252-Ca [Cameroon, Daiguene, S F]	Cameroon	Daiguene	F	S	wt
AN0252-Cb	AN0252-C	CMgam	AN0252-Cb [Cameroon, Daiguene, S F]	Cameroon	Daiguene	F	S	wt
AN0253-Ca	AN0253-C	CMgam	AN0253-Ca [Cameroon, Daiguene, S F]	Cameroon	Daiguene	F	S	C4
AN0253-Cb	AN0253-C	CMgam	AN0253-Cb [Cameroon, Daiguene, S F]	Cameroon	Daiguene	F	S	wt
AN0254-Ca	AN0254-C	CMgam	AN0254-Ca [Cameroon, Daiguene, S F]	Cameroon	Daiguene	F	S	wt
AN0254-Cb	AN0254-C	CMgam	AN0254-Cb [Cameroon, Daiguene, S F]	Cameroon	Daiguene	F	S	wt
AN0255-Ca	AN0255-C	CMgam	AN0255-Ca [Cameroon, Daiguene, S F]	Cameroon	Daiguene	F	S	wt
AN0255-Cb	AN0255-C	CMgam	AN0255-Cb [Cameroon, Daiguene, S F]	Cameroon	Daiguene	F	S	wt
AN0256-Ca	AN0256-C	CMgam	AN0256-Ca [Cameroon, Daiguene, S F]	Cameroon	Daiguene	F	S	wt
AN0256-Cb	AN0256-C	CMgam	AN0256-Cb [Cameroon, Daiguene, S F]	Cameroon	Daiguene	F	S	wt
AN0258-Ca	AN0258-C	CMgam	AN0258-Ca [Cameroon, Daiguene, S F]	Cameroon	Daiguene	F	S	wt
AN0258-Cb	AN0258-C	CMgam	AN0258-Cb [Cameroon, Daiguene, S F]	Cameroon	Daiguene	F	S	wt
AN0259-Ca	AN0259-C	CMgam	AN0259-Ca [Cameroon, Daiguene, S F]	Cameroon	Daiguene	F	S	wt
AN0259-Cb	AN0259-C	CMgam	AN0259-Cb [Cameroon, Daiguene, S F]	Cameroon	Daiguene	F	S	wt
AN0260-Ca	AN0260-C	CMgam	AN0260-Ca [Cameroon, Daiguene, S F]	Cameroon	Daiguene	F	S	wt
AN0260-Cb	AN0260-C	CMgam	AN0260-Cb [Cameroon, Daiguene, S F]	Cameroon	Daiguene	F	S	wt
AN0261-Ca	AN0261-C	CMgam	AN0261-Ca [Cameroon, Daiguene, S F]	Cameroon	Daiguene	F	S	wt
AN0261-Cb	AN0261-C	CMgam	AN0261-Cb [Cameroon, Daiguene, S F]	Cameroon	Daiguene	F	S	wt
AN0262-Ca	AN0262-C	CMgam	AN0262-Ca [Cameroon, Daiguene, S F]	Cameroon	Daiguene	F	S	wt
AN0262-Cb	AN0262-C	CMgam	AN0262-Cb [Cameroon, Daiguene, S F]	Cameroon	Daiguene	F	S	wt
AN0263-Ca	AN0263-C	CMgam	AN0263-Ca [Cameroon, Daiguene, S F]	Cameroon	Daiguene	F	S	wt
AN0263-Cb	AN0263-C	CMgam	AN0263-Cb [Cameroon, Daiguene, S F]	Cameroon	Daiguene	F	S	wt
AN0264-Ca	AN0264-C	CMgam	AN0264-Ca [Cameroon, Daiguene, S F]	Cameroon	Daiguene	F	S	wt
AN0264-Cb	AN0264-C	CMgam	AN0264-Cb [Cameroon, Daiguene, S F]	Cameroon	Daiguene	F	S	wt
AN0265-Ca	AN0265-C	CMgam	AN0265-Ca [Cameroon, Daiguene, S F]	Cameroon	Daiguene	F	S	wt
AN0265-Cb	AN0265-C	CMgam	AN0265-Cb [Cameroon, Daiguene, S F]	Cameroon	Daiguene	F	S	wt
AN0266-Ca	AN0266-C	CMgam	AN0266-Ca [Cameroon, Daiguene, S F]	Cameroon	Daiguene	F	S	wt
AN0266-Cb	AN0266-C	CMgam	AN0266-Cb [Cameroon, Daiguene, S F]	Cameroon	Daiguene	F	S	wt
AN0267-Ca	AN0267-C	CMgam	AN0267-Ca [Cameroon, Daiguene, S F]	Cameroon	Daiguene	F	S	wt
AN0267-Cb	AN0267-C	CMgam	AN0267-Cb [Cameroon, Daiguene, S F]	Cameroon	Daiguene	F	S	wt
AN0268-Ca	AN0268-C	CMgam	AN0268-Ca [Cameroon, Daiguene, S F]	Cameroon	Daiguene	F	S	wt
AN0268-Cb	AN0268-C	CMgam	AN0268-Cb [Cameroon, Daiguene, S F]	Cameroon	Daiguene	F	S	wt
AN0269-Ca	AN0269-C	CMgam	AN0269-Ca [Cameroon, Daiguene, S F]	Cameroon	Daiguene	F	S	wt
AN0269-Cb	AN0269-C	CMgam	AN0269-Cb [Cameroon, Daiguene, S F]	Cameroon	Daiguene	F	S	wt
AN0270-Ca	AN0270-C	CMgam	AN0270-Ca [Cameroon, Daiguene, S F]	Cameroon	Daiguene	F	S	wt
AN0270-Cb	AN0270-C	CMgam	AN0270-Cb [Cameroon, Daiguene, S F]	Cameroon	Daiguene	F	S	wt
AN0271-Ca	AN0271-C	CMgam	AN0271-Ca [Cameroon, Daiguene, S F]	Cameroon	Daiguene	F	S	wt
AN0271-Cb	AN0271-C	CMgam	AN0271-Cb [Cameroon, Daiguene, S F]	Cameroon	Daiguene	F	S	wt
AN0272-Ca	AN0272-C	CMgam	AN0272-Ca [Cameroon, Daiguene, S F]	Cameroon	Daiguene	F	S	wt
AN0272-Cb	AN0272-C	CMgam	AN0272-Cb [Cameroon, Daiguene, S F]	Cameroon	Daiguene	F	S	wt
AN0275-Ca	AN0275-C	CMgam	AN0275-Ca [Cameroon, Daiguene, S F]	Cameroon	Daiguene	F	S	wt
AN0275-Cb	AN0275-C	CMgam	AN0275-Cb [Cameroon, Daiguene, S F]	Cameroon	Daiguene	F	S	wt
AN0276-Ca	AN0276-C	CMgam	AN0276-Ca [Cameroon, Daiguene, S F]	Cameroon	Daiguene	F	S	wt
AN0276-Cb	AN0276-C	CMgam	AN0276-Cb [Cameroon, Daiguene, S F]	Cameroon	Daiguene	F	S	wt
AN0277-Ca	AN0277-C	CMgam	AN0277-Ca [Cameroon, Daiguene, S F]	Cameroon	Daiguene	F	S	wt
AN0277-Cb	AN0277-C	CMgam	AN0277-Cb [Cameroon, Daiguene, S F]	Cameroon	Daiguene	F	S	wt
AN0278-Ca	AN0278-C	CMgam	AN0278-Ca [Cameroon, Daiguene, S F]	Cameroon	Daiguene	F	S	wt
AN0278-Cb	AN0278-C	CMgam	AN0278-Cb [Cameroon, Daiguene, S F]	Cameroon	Daiguene	F	S	wt
AN0279-Ca	AN0279-C	CMgam	AN0279-Ca [Cameroon, Daiguene, S F]	Cameroon	Daiguene	F	S	wt
AN0279-Cb	AN0279-C	CMgam	AN0279-Cb [Cameroon, Daiguene, S F]	Cameroon	Daiguene	F	S	wt
AN0280-Ca	AN0280-C	CMgam	AN0280-Ca [Cameroon, Daiguene, S F]	Cameroon	Daiguene	F	S	wt
AN0280-Cb	AN0280-C	CMgam	AN0280-Cb [Cameroon, Daiguene, S F]	Cameroon	Daiguene	F	S	wt
AN0281-Ca	AN0281-C	CMgam	AN0281-Ca [Cameroon, Daiguene, S F]	Cameroon	Daiguene	F	S	wt
AN0281-Cb	AN0281-C	CMgam	AN0281-Cb [Cameroon, Daiguene, S F]	Cameroon	Daiguene	F	S	wt
AN0282-Ca	AN0282-C	CMgam	AN0282-Ca [Cameroon, Daiguene, S F]	Cameroon	Daiguene	F	S	C4
AN0282-Cb	AN0282-C	CMgam	AN0282-Cb [Cameroon, Daiguene, S F]	Cameroon	Daiguene	F	S	wt
AN0283-Ca	AN0283-C	CMgam	AN0283-Ca [Cameroon, Daiguene, S F]	Cameroon	Daiguene	F	S	wt
AN0283-Cb	AN0283-C	CMgam	AN0283-Cb [Cameroon, Daiguene, S F]	Cameroon	Daiguene	F	S	wt
AN0284-Ca	AN0284-C	CMgam	AN0284-Ca [Cameroon, Daiguene, S F]	Cameroon	Daiguene	F	S	wt
AN0284-Cb	AN0284-C	CMgam	AN0284-Cb [Cameroon, Daiguene, S F]	Cameroon	Daiguene	F	S	wt
AN0285-Ca	AN0285-C	CMgam	AN0285-Ca [Cameroon, Daiguene, S F]	Cameroon	Daiguene	F	S	wt
AN0285-Cb	AN0285-C	CMgam	AN0285-Cb [Cameroon, Daiguene, S F]	Cameroon	Daiguene	F	S	wt
AN0286-Ca	AN0286-C	CMgam	AN0286-Ca [Cameroon, Daiguene, S F]	Cameroon	Daiguene	F	S	wt
AN0286-Cb	AN0286-C	CMgam	AN0286-Cb [Cameroon, Daiguene, S F]	Cameroon	Daiguene	F	S	wt
AN0287-Ca	AN0287-C	CMgam	AN0287-Ca [Cameroon, Daiguene, S F]	Cameroon	Daiguene	F	S	wt
AN0287-Cb	AN0287-C	CMgam	AN0287-Cb [Cameroon, Daiguene, S F]	Cameroon	Daiguene	F	S	wt
AN0288-Ca	AN0288-C	CMgam	AN0288-Ca [Cameroon, Daiguene, S F]	Cameroon	Daiguene	F	S	wt
AN0288-Cb	AN0288-C	CMgam	AN0288-Cb [Cameroon, Daiguene, S F]	Cameroon	Daiguene	F	S	wt
AN0289-Ca	AN0289-C	CMgam	AN0289-Ca [Cameroon, Daiguene, S F]	Cameroon	Daiguene	F	S	wt
AN0289-Cb	AN0289-C	CMgam	AN0289-Cb [Cameroon, Daiguene, S F]	Cameroon	Daiguene	F	S	wt
AN0290-Ca	AN0290-C	CMgam	AN0290-Ca [Cameroon, Daiguene, S F]	Cameroon	Daiguene	F	S	wt
AN0290-Cb	AN0290-C	CMgam	AN0290-Cb [Cameroon, Daiguene, S F]	Cameroon	Daiguene	F	S	C3
AN0291-Ca	AN0291-C	CMgam	AN0291-Ca [Cameroon, Daiguene, S F]	Cameroon	Daiguene	F	S	wt
AN0291-Cb	AN0291-C	CMgam	AN0291-Cb [Cameroon, Daiguene, S F]	Cameroon	Daiguene	F	S	wt
AN0292-Ca	AN0292-C	CMgam	AN0292-Ca [Cameroon, Daiguene, S F]	Cameroon	Daiguene	F	S	wt
AN0292-Cb	AN0292-C	CMgam	AN0292-Cb [Cameroon, Daiguene, S F]	Cameroon	Daiguene	F	S	wt
AN0293-Ca	AN0293-C	CMgam	AN0293-Ca [Cameroon, Daiguene, S F]	Cameroon	Daiguene	F	S	wt
AN0293-Cb	AN0293-C	CMgam	AN0293-Cb [Cameroon, Daiguene, S F]	Cameroon	Daiguene	F	S	wt
AN0294-Ca	AN0294-C	CMgam	AN0294-Ca [Cameroon, Daiguene, S F]	Cameroon	Daiguene	F	S	wt
AN0294-Cb	AN0294-C	CMgam	AN0294-Cb [Cameroon, Daiguene, S F]	Cameroon	Daiguene	F	S	wt
AN0295-Ca	AN0295-C	CMgam	AN0295-Ca [Cameroon, Daiguene, S F]	Cameroon	Daiguene	F	S	wt
AN0295-Cb	AN0295-C	CMgam	AN0295-Cb [Cameroon, Daiguene, S F]	Cameroon	Daiguene	F	S	wt
AN0296-Ca	AN0296-C	CMgam	AN0296-Ca [Cameroon, Daiguene, S F]	Cameroon	Daiguene	F	S	wt
AN0296-Cb	AN0296-C	CMgam	AN0296-Cb [Cameroon, Daiguene, S F]	Cameroon	Daiguene	F	S	wt
AN0297-Ca	AN0297-C	CMgam	AN0297-Ca [Cameroon, Daiguene, S F]	Cameroon	Daiguene	F	S	wt
AN0297-Cb	AN0297-C	CMgam	AN0297-Cb [Cameroon, Daiguene, S F]	Cameroon	Daiguene	F	S	wt
AN0298-Ca	AN0298-C	CMgam	AN0298-Ca [Cameroon, Daiguene, S F]	Cameroon	Daiguene	F	S	wt
AN0298-Cb	AN0298-C	CMgam	AN0298-Cb [Cameroon, Daiguene, S F]	Cameroon	Daiguene	F	S	wt
AN0299-Ca	AN0299-C	CMgam	AN0299-Ca [Cameroon, Daiguene, S F]	Cameroon	Daiguene	F	S	wt
AN0299-Cb	AN0299-C	CMgam	AN0299-Cb [Cameroon, Daiguene, S F]	Cameroon	Daiguene	F	S	wt
AN0300-Ca	AN0300-C	CMgam	AN0300-Ca [Cameroon, Daiguene, S F]	Cameroon	Daiguene	F	S	wt
AN0300-Cb	AN0300-C	CMgam	AN0300-Cb [Cameroon, Daiguene, S F]	Cameroon	Daiguene	F	S	wt
AN0301-Ca	AN0301-C	CMgam	AN0301-Ca [Cameroon, Daiguene, S F]	Cameroon	Daiguene	F	S	wt
AN0301-Cb	AN0301-C	CMgam	AN0301-Cb [Cameroon, Daiguene, S F]	Cameroon	Daiguene	F	S	wt
AN0302-Ca	AN0302-C	CMgam	AN0302-Ca [Cameroon, Daiguene, S F]	Cameroon	Daiguene	F	S	wt
AN0302-Cb	AN0302-C	CMgam	AN0302-Cb [Cameroon, Daiguene, S F]	Cameroon	Daiguene	F	S	wt
AN0303-Ca	AN0303-C	CMgam	AN0303-Ca [Cameroon, Daiguene, S F]	Cameroon	Daiguene	F	S	wt
AN0303-Cb	AN0303-C	CMgam	AN0303-Cb [Cameroon, Daiguene, S F]	Cameroon	Daiguene	F	S	wt
AN0304-Ca	AN0304-C	CMgam	AN0304-Ca [Cameroon, Daiguene, S F]	Cameroon	Daiguene	F	S	wt
AN0304-Cb	AN0304-C	CMgam	AN0304-Cb [Cameroon, Daiguene, S F]	Cameroon	Daiguene	F	S	wt
AN0305-Ca	AN0305-C	CMgam	AN0305-Ca [Cameroon, Daiguene, S F]	Cameroon	Daiguene	F	S	wt
AN0305-Cb	AN0305-C	CMgam	AN0305-Cb [Cameroon, Daiguene, S F]	Cameroon	Daiguene	F	S	wt
AN0306-Ca	AN0306-C	CMgam	AN0306-Ca [Cameroon, Daiguene, S F]	Cameroon	Daiguene	F	S	wt
AN0306-Cb	AN0306-C	CMgam	AN0306-Cb [Cameroon, Daiguene, S F]	Cameroon	Daiguene	F	S	wt
AN0307-Ca	AN0307-C	CMgam	AN0307-Ca [Cameroon, Daiguene, S F]	Cameroon	Daiguene	F	S	wt
AN0307-Cb	AN0307-C	CMgam	AN0307-Cb [Cameroon, Daiguene, S F]	Cameroon	Daiguene	F	S	wt
AN0308-Ca	AN0308-C	CMgam	AN0308-Ca [Cameroon, Daiguene, S F]	Cameroon	Daiguene	F	S	wt
AN0308-Cb	AN0308-C	CMgam	AN0308-Cb [Cameroon, Daiguene, S F]	Cameroon	Daiguene	F	S	wt
AN0309-Ca	AN0309-C	CMgam	AN0309-Ca [Cameroon, Daiguene, S F]	Cameroon	Daiguene	F	S	wt
AN0309-Cb	AN0309-C	CMgam	AN0309-Cb [Cameroon, Daiguene, S F]	Cameroon	Daiguene	F	S	wt
AN0310-Ca	AN0310-C	CMgam	AN0310-Ca [Cameroon, Daiguene, S F]	Cameroon	Daiguene	F	S	wt
AN0310-Cb	AN0310-C	CMgam	AN0310-Cb [Cameroon, Daiguene, S F]	Cameroon	Daiguene	F	S	wt
AN0311-Ca	AN0311-C	CMgam	AN0311-Ca [Cameroon, Daiguene, S F]	Cameroon	Daiguene	F	S	wt
AN0311-Cb	AN0311-C	CMgam	AN0311-Cb [Cameroon, Daiguene, S F]	Cameroon	Daiguene	F	S	wt
AN0312-Ca	AN0312-C	CMgam	AN0312-Ca [Cameroon, Daiguene, S F]	Cameroon	Daiguene	F	S	wt
AN0312-Cb	AN0312-C	CMgam	AN0312-Cb [Cameroon, Daiguene, S F]	Cameroon	Daiguene	F	S	wt
AN0313-Ca	AN0313-C	CMgam	AN0313-Ca [Cameroon, Daiguene, S F]	Cameroon	Daiguene	F	S	wt
AN0313-Cb	AN0313-C	CMgam	AN0313-Cb [Cameroon, Daiguene, S F]	Cameroon	Daiguene	F	S	wt
AN0314-Ca	AN0314-C	CMgam	AN0314-Ca [Cameroon, Daiguene, S F]	Cameroon	Daiguene	F	S	wt
AN0314-Cb	AN0314-C	CMgam	AN0314-Cb [Cameroon, Daiguene, S F]	Cameroon	Daiguene	F	S	wt
AN0315-Ca	AN0315-C	CMgam	AN0315-Ca [Cameroon, Daiguene, S F]	Cameroon	Daiguene	F	S	wt
AN0315-Cb	AN0315-C	CMgam	AN0315-Cb [Cameroon, Daiguene, S F]	Cameroon	Daiguene	F	S	wt
AN0316-Ca	AN0316-C	CMgam	AN0316-Ca [Cameroon, Daiguene, S F]	Cameroon	Daiguene	F	S	wt
AN0316-Cb	AN0316-C	CMgam	AN0316-Cb [Cameroon, Daiguene, S F]	Cameroon	Daiguene	F	S	wt
AN0317-Ca	AN0317-C	CMgam	AN0317-Ca [Cameroon, Daiguene, S F]	Cameroon	Daiguene	F	S	wt
AN0317-Cb	AN0317-C	CMgam	AN0317-Cb [Cameroon, Daiguene, S F]	Cameroon	Daiguene	F	S	wt
AN0318-Ca	AN0318-C	CMgam	AN0318-Ca [Cameroon, Daiguene, S F]	Cameroon	Daiguene	F	S	wt
AN0318-Cb	AN0318-C	CMgam	AN0318-Cb [Cameroon, Daiguene, S F]	Cameroon	Daiguene	F	S	wt
AN0319-Ca	AN0319-C	CMgam	AN0319-Ca [Cameroon, Daiguene, S F]	Cameroon	Daiguene	F	S	wt
AN0319-Cb	AN0319-C	CMgam	AN0319-Cb [Cameroon, Daiguene, S F]	Cameroon	Daiguene	F	S	wt
AN0320-Ca	AN0320-C	CMgam	AN0320-Ca [Cameroon, Daiguene, S F]	Cameroon	Daiguene	F	S	wt
AN0320-Cb	AN0320-C	CMgam	AN0320-Cb [Cameroon, Daiguene, S F]	Cameroon	Daiguene	F	S	wt
AN0321-Ca	AN0321-C	CMgam	AN0321-Ca [Cameroon, Daiguene, S F]	Cameroon	Daiguene	F	S	wt
AN0321-Cb	AN0321-C	CMgam	AN0321-Cb [Cameroon, Daiguene, S F]	Cameroon	Daiguene	F	S	wt
AP0002-Ca	AP0002-C	FRgam	AP0002-Ca [France, Mayotte, S F]	France	Mayotte	F	S	wt
AP0002-Cb	AP0002-C	FRgam	AP0002-Cb [France, Mayotte, S F]	France	Mayotte	F	S	wt
AP0005-Ca	AP0005-C	FRgam	AP0005-Ca [France, Mayotte, S F]	France	Mayotte	F	S	wt
AP0005-Cb	AP0005-C	FRgam	AP0005-Cb [France, Mayotte, S F]	France	Mayotte	F	S	wt
AP0006-Ca	AP0006-C	FRgam	AP0006-Ca [France, Mayotte, S F]	France	Mayotte	F	S	wt
AP0006-Cb	AP0006-C	FRgam	AP0006-Cb [France, Mayotte, S F]	France	Mayotte	F	S	wt
AP0007-Ca	AP0007-C	FRgam	AP0007-Ca [France, Mayotte, S F]	France	Mayotte	F	S	wt
AP0007-Cb	AP0007-C	FRgam	AP0007-Cb [France, Mayotte, S F]	France	Mayotte	F	S	wt
AP0008-Ca	AP0008-C	FRgam	AP0008-Ca [France, Mayotte, S F]	France	Mayotte	F	S	wt
AP0008-Cb	AP0008-C	FRgam	AP0008-Cb [France, Mayotte, S F]	France	Mayotte	F	S	wt
AP0009-Ca	AP0009-C	FRgam	AP0009-Ca [France, Mayotte, S M]	France	Mayotte	M	S	wt
AP0009-Cb	AP0009-C	FRgam	AP0009-Cb [France, Mayotte, S M]	France	Mayotte	M	S	wt
AP0010-Ca	AP0010-C	FRgam	AP0010-Ca [France, Mayotte, S M]	France	Mayotte	M	S	wt
AP0010-Cb	AP0010-C	FRgam	AP0010-Cb [France, Mayotte, S M]	France	Mayotte	M	S	wt
AP0011-Ca	AP0011-C	FRgam	AP0011-Ca [France, Mayotte, S M]	France	Mayotte	M	S	wt
AP0011-Cb	AP0011-C	FRgam	AP0011-Cb [France, Mayotte, S M]	France	Mayotte	M	S	wt
AP0014-Ca	AP0014-C	FRgam	AP0014-Ca [France, Mayotte, S M]	France	Mayotte	M	S	wt
AP0014-Cb	AP0014-C	FRgam	AP0014-Cb [France, Mayotte, S M]	France	Mayotte	M	S	wt
AP0017-Ca	AP0017-C	FRgam	AP0017-Ca [France, Mayotte, S F]	France	Mayotte	F	S	wt
AP0017-Cb	AP0017-C	FRgam	AP0017-Cb [France, Mayotte, S F]	France	Mayotte	F	S	wt
AP0018-Ca	AP0018-C	FRgam	AP0018-Ca [France, Mayotte, S M]	France	Mayotte	M	S	wt
AP0018-Cb	AP0018-C	FRgam	AP0018-Cb [France, Mayotte, S M]	France	Mayotte	M	S	wt
AP0019-Ca	AP0019-C	FRgam	AP0019-Ca [France, Mayotte, S M]	France	Mayotte	M	S	wt
AP0019-Cb	AP0019-C	FRgam	AP0019-Cb [France, Mayotte, S M]	France	Mayotte	M	S	wt
AP0020-Ca	AP0020-C	FRgam	AP0020-Ca [France, Mayotte, S M]	France	Mayotte	M	S	wt
AP0020-Cb	AP0020-C	FRgam	AP0020-Cb [France, Mayotte, S M]	France	Mayotte	M	S	wt
AP0021-Ca	AP0021-C	FRgam	AP0021-Ca [France, Mayotte, S F]	France	Mayotte	F	S	wt
AP0021-Cb	AP0021-C	FRgam	AP0021-Cb [France, Mayotte, S F]	France	Mayotte	F	S	wt
AP0022-Ca	AP0022-C	FRgam	AP0022-Ca [France, Mayotte, S F]	France	Mayotte	F	S	wt
AP0022-Cb	AP0022-C	FRgam	AP0022-Cb [France, Mayotte, S F]	France	Mayotte	F	S	wt
AP0023-Ca	AP0023-C	FRgam	AP0023-Ca [France, Mayotte, S F]	France	Mayotte	F	S	wt
AP0023-Cb	AP0023-C	FRgam	AP0023-Cb [France, Mayotte, S F]	France	Mayotte	F	S	wt
AP0024-Ca	AP0024-C	FRgam	AP0024-Ca [France, Mayotte, S F]	France	Mayotte	F	S	wt
AP0024-Cb	AP0024-C	FRgam	AP0024-Cb [France, Mayotte, S F]	France	Mayotte	F	S	wt
AP0025-Ca	AP0025-C	FRgam	AP0025-Ca [France, Mayotte, S M]	France	Mayotte	M	S	wt
AP0025-Cb	AP0025-C	FRgam	AP0025-Cb [France, Mayotte, S M]	France	Mayotte	M	S	wt
AP0030-Ca	AP0030-C	FRgam	AP0030-Ca [France, Mayotte, S F]	France	Mayotte	F	S	wt
AP0030-Cb	AP0030-C	FRgam	AP0030-Cb [France, Mayotte, S F]	France	Mayotte	F	S	wt
AP0031-Ca	AP0031-C	FRgam	AP0031-Ca [France, Mayotte, S M]	France	Mayotte	M	S	wt
AP0031-Cb	AP0031-C	FRgam	AP0031-Cb [France, Mayotte, S M]	France	Mayotte	M	S	wt
AP0032-Ca	AP0032-C	FRgam	AP0032-Ca [France, Mayotte, S M]	France	Mayotte	M	S	wt
AP0032-Cb	AP0032-C	FRgam	AP0032-Cb [France, Mayotte, S M]	France	Mayotte	M	S	wt
AP0033-Ca	AP0033-C	FRgam	AP0033-Ca [France, Mayotte, S F]	France	Mayotte	F	S	wt
AP0033-Cb	AP0033-C	FRgam	AP0033-Cb [France, Mayotte, S F]	France	Mayotte	F	S	wt
AP0034-Ca	AP0034-C	FRgam	AP0034-Ca [France, Mayotte, S M]	France	Mayotte	M	S	wt
AP0034-Cb	AP0034-C	FRgam	AP0034-Cb [France, Mayotte, S M]	France	Mayotte	M	S	wt
AP0035-Ca	AP0035-C	FRgam	AP0035-Ca [France, Mayotte, S M]	France	Mayotte	M	S	wt
AP0035-Cb	AP0035-C	FRgam	AP0035-Cb [France, Mayotte, S M]	France	Mayotte	M	S	wt
AQ0001-Ca	AQ0001-C	GQgam	AQ0001-Ca [Equatorial Guinea, Bioko, S F]	Equatorial Guinea	Bioko	F	S	wt
AQ0001-Cb	AQ0001-C	GQgam	AQ0001-Cb [Equatorial Guinea, Bioko, S F]	Equatorial Guinea	Bioko	F	S	wt
AQ0002-Ca	AQ0002-C	GQgam	AQ0002-Ca [Equatorial Guinea, Bioko, S F]	Equatorial Guinea	Bioko	F	S	wt
AQ0002-Cb	AQ0002-C	GQgam	AQ0002-Cb [Equatorial Guinea, Bioko, S F]	Equatorial Guinea	Bioko	F	S	wt
AQ0004-Ca	AQ0004-C	GQgam	AQ0004-Ca [Equatorial Guinea, Bioko, S F]	Equatorial Guinea	Bioko	F	S	wt
AQ0004-Cb	AQ0004-C	GQgam	AQ0004-Cb [Equatorial Guinea, Bioko, S F]	Equatorial Guinea	Bioko	F	S	wt
AQ0005-Ca	AQ0005-C	GQgam	AQ0005-Ca [Equatorial Guinea, Bioko, S F]	Equatorial Guinea	Bioko	F	S	wt
AQ0005-Cb	AQ0005-C	GQgam	AQ0005-Cb [Equatorial Guinea, Bioko, S F]	Equatorial Guinea	Bioko	F	S	wt
AQ0011-Ca	AQ0011-C	GQgam	AQ0011-Ca [Equatorial Guinea, Bioko, S F]	Equatorial Guinea	Bioko	F	S	wt
AQ0011-Cb	AQ0011-C	GQgam	AQ0011-Cb [Equatorial Guinea, Bioko, S F]	Equatorial Guinea	Bioko	F	S	wt
AQ0012-Ca	AQ0012-C	GQgam	AQ0012-Ca [Equatorial Guinea, Bioko, S F]	Equatorial Guinea	Bioko	F	S	wt
AQ0012-Cb	AQ0012-C	GQgam	AQ0012-Cb [Equatorial Guinea, Bioko, S F]	Equatorial Guinea	Bioko	F	S	wt
AQ0013-Ca	AQ0013-C	GQgam	AQ0013-Ca [Equatorial Guinea, Bioko, S F]	Equatorial Guinea	Bioko	F	S	wt
AQ0013-Cb	AQ0013-C	GQgam	AQ0013-Cb [Equatorial Guinea, Bioko, S F]	Equatorial Guinea	Bioko	F	S	wt
AQ0014-Ca	AQ0014-C	GQgam	AQ0014-Ca [Equatorial Guinea, Bioko, S F]	Equatorial Guinea	Bioko	F	S	wt
AQ0014-Cb	AQ0014-C	GQgam	AQ0014-Cb [Equatorial Guinea, Bioko, S F]	Equatorial Guinea	Bioko	F	S	C4
AQ0015-Ca	AQ0015-C	GQgam	AQ0015-Ca [Equatorial Guinea, Bioko, S F]	Equatorial Guinea	Bioko	F	S	wt
AQ0015-Cb	AQ0015-C	GQgam	AQ0015-Cb [Equatorial Guinea, Bioko, S F]	Equatorial Guinea	Bioko	F	S	wt
AR0001-Ca	AR0001-C	AOcol	AR0001-Ca [Angola, Luanda, M F]	Angola	Luanda	F	M	C1
AR0001-Cb	AR0001-C	AOcol	AR0001-Cb [Angola, Luanda, M F]	Angola	Luanda	F	M	C1
AR0007-Ca	AR0007-C	AOcol	AR0007-Ca [Angola, Luanda, M F]	Angola	Luanda	F	M	wt
AR0007-Cb	AR0007-C	AOcol	AR0007-Cb [Angola, Luanda, M F]	Angola	Luanda	F	M	wt
AR0008-Ca	AR0008-C	AOcol	AR0008-Ca [Angola, Luanda, M F]	Angola	Luanda	F	M	C1
AR0008-Cb	AR0008-C	AOcol	AR0008-Cb [Angola, Luanda, M F]	Angola	Luanda	F	M	wt
AR0009-Ca	AR0009-C	AOcol	AR0009-Ca [Angola, Luanda, M F]	Angola	Luanda	F	M	wt
AR0009-Cb	AR0009-C	AOcol	AR0009-Cb [Angola, Luanda, M F]	Angola	Luanda	F	M	wt
AR0010-Ca	AR0010-C	AOcol	AR0010-Ca [Angola, Luanda, M F]	Angola	Luanda	F	M	wt
AR0010-Cb	AR0010-C	AOcol	AR0010-Cb [Angola, Luanda, M F]	Angola	Luanda	F	M	C1
AR0011-Ca	AR0011-C	AOcol	AR0011-Ca [Angola, Luanda, M F]	Angola	Luanda	F	M	wt
AR0011-Cb	AR0011-C	AOcol	AR0011-Cb [Angola, Luanda, M F]	Angola	Luanda	F	M	C1
AR0012-Ca	AR0012-C	AOcol	AR0012-Ca [Angola, Luanda, M F]	Angola	Luanda	F	M	wt
AR0012-Cb	AR0012-C	AOcol	AR0012-Cb [Angola, Luanda, M F]	Angola	Luanda	F	M	C1
AR0013-Ca	AR0013-C	AOcol	AR0013-Ca [Angola, Luanda, M F]	Angola	Luanda	F	M	wt
AR0013-Cb	AR0013-C	AOcol	AR0013-Cb [Angola, Luanda, M F]	Angola	Luanda	F	M	wt
AR0014-Ca	AR0014-C	AOcol	AR0014-Ca [Angola, Luanda, M F]	Angola	Luanda	F	M	wt
AR0014-Cb	AR0014-C	AOcol	AR0014-Cb [Angola, Luanda, M F]	Angola	Luanda	F	M	wt
AR0015-Ca	AR0015-C	AOcol	AR0015-Ca [Angola, Luanda, M F]	Angola	Luanda	F	M	wt
AR0015-Cb	AR0015-C	AOcol	AR0015-Cb [Angola, Luanda, M F]	Angola	Luanda	F	M	C1
AR0016-Ca	AR0016-C	AOcol	AR0016-Ca [Angola, Luanda, M F]	Angola	Luanda	F	M	C1
AR0016-Cb	AR0016-C	AOcol	AR0016-Cb [Angola, Luanda, M F]	Angola	Luanda	F	M	wt
AR0017-Ca	AR0017-C	AOcol	AR0017-Ca [Angola, Luanda, M F]	Angola	Luanda	F	M	wt
AR0017-Cb	AR0017-C	AOcol	AR0017-Cb [Angola, Luanda, M F]	Angola	Luanda	F	M	wt
AR0018-Ca	AR0018-C	AOcol	AR0018-Ca [Angola, Luanda, M F]	Angola	Luanda	F	M	wt
AR0018-Cb	AR0018-C	AOcol	AR0018-Cb [Angola, Luanda, M F]	Angola	Luanda	F	M	C1
AR0019-Ca	AR0019-C	AOcol	AR0019-Ca [Angola, Luanda, M F]	Angola	Luanda	F	M	wt
AR0019-Cb	AR0019-C	AOcol	AR0019-Cb [Angola, Luanda, M F]	Angola	Luanda	F	M	C1
AR0020-Ca	AR0020-C	AOcol	AR0020-Ca [Angola, Luanda, M F]	Angola	Luanda	F	M	C1
AR0020-Cb	AR0020-C	AOcol	AR0020-Cb [Angola, Luanda, M F]	Angola	Luanda	F	M	C1
AR0021-Ca	AR0021-C	AOcol	AR0021-Ca [Angola, Luanda, M F]	Angola	Luanda	F	M	C1
AR0021-Cb	AR0021-C	AOcol	AR0021-Cb [Angola, Luanda, M F]	Angola	Luanda	F	M	C1
AR0022-Ca	AR0022-C	AOcol	AR0022-Ca [Angola, Luanda, M F]	Angola	Luanda	F	M	wt
AR0022-Cb	AR0022-C	AOcol	AR0022-Cb [Angola, Luanda, M F]	Angola	Luanda	F	M	wt
AR0023-Ca	AR0023-C	AOcol	AR0023-Ca [Angola, Luanda, M F]	Angola	Luanda	F	M	C1
AR0023-Cb	AR0023-C	AOcol	AR0023-Cb [Angola, Luanda, M F]	Angola	Luanda	F	M	C1
AR0024-Ca	AR0024-C	AOcol	AR0024-Ca [Angola, Luanda, M F]	Angola	Luanda	F	M	wt
AR0024-Cb	AR0024-C	AOcol	AR0024-Cb [Angola, Luanda, M F]	Angola	Luanda	F	M	wt
AR0026-Ca	AR0026-C	AOcol	AR0026-Ca [Angola, Luanda, M F]	Angola	Luanda	F	M	wt
AR0026-Cb	AR0026-C	AOcol	AR0026-Cb [Angola, Luanda, M F]	Angola	Luanda	F	M	wt
AR0027-Ca	AR0027-C	AOcol	AR0027-Ca [Angola, Luanda, M F]	Angola	Luanda	F	M	C1
AR0027-Cb	AR0027-C	AOcol	AR0027-Cb [Angola, Luanda, M F]	Angola	Luanda	F	M	wt
AR0034-Ca	AR0034-C	AOcol	AR0034-Ca [Angola, Luanda, M F]	Angola	Luanda	F	M	wt
AR0034-Cb	AR0034-C	AOcol	AR0034-Cb [Angola, Luanda, M F]	Angola	Luanda	F	M	wt
AR0035-Ca	AR0035-C	AOcol	AR0035-Ca [Angola, Luanda, M F]	Angola	Luanda	F	M	C1
AR0035-Cb	AR0035-C	AOcol	AR0035-Cb [Angola, Luanda, M F]	Angola	Luanda	F	M	C1
AR0036-Ca	AR0036-C	AOcol	AR0036-Ca [Angola, Luanda, M F]	Angola	Luanda	F	M	wt
AR0036-Cb	AR0036-C	AOcol	AR0036-Cb [Angola, Luanda, M F]	Angola	Luanda	F	M	wt
AR0038-Ca	AR0038-C	AOcol	AR0038-Ca [Angola, Luanda, M F]	Angola	Luanda	F	M	wt
AR0038-Cb	AR0038-C	AOcol	AR0038-Cb [Angola, Luanda, M F]	Angola	Luanda	F	M	C1
AR0040-Ca	AR0040-C	AOcol	AR0040-Ca [Angola, Luanda, M F]	Angola	Luanda	F	M	wt
AR0040-Cb	AR0040-C	AOcol	AR0040-Cb [Angola, Luanda, M F]	Angola	Luanda	F	M	wt
AR0042-Ca	AR0042-C	AOcol	AR0042-Ca [Angola, Luanda, M F]	Angola	Luanda	F	M	wt
AR0042-Cb	AR0042-C	AOcol	AR0042-Cb [Angola, Luanda, M F]	Angola	Luanda	F	M	wt
AR0043-Ca	AR0043-C	AOcol	AR0043-Ca [Angola, Luanda, M F]	Angola	Luanda	F	M	wt
AR0043-Cb	AR0043-C	AOcol	AR0043-Cb [Angola, Luanda, M F]	Angola	Luanda	F	M	wt
AR0044-Ca	AR0044-C	AOcol	AR0044-Ca [Angola, Luanda, M F]	Angola	Luanda	F	M	wt
AR0044-Cb	AR0044-C	AOcol	AR0044-Cb [Angola, Luanda, M F]	Angola	Luanda	F	M	wt
AR0045-Ca	AR0045-C	AOcol	AR0045-Ca [Angola, Luanda, M F]	Angola	Luanda	F	M	C1
AR0045-Cb	AR0045-C	AOcol	AR0045-Cb [Angola, Luanda, M F]	Angola	Luanda	F	M	C1
AR0046-Ca	AR0046-C	AOcol	AR0046-Ca [Angola, Luanda, M F]	Angola	Luanda	F	M	wt
AR0046-Cb	AR0046-C	AOcol	AR0046-Cb [Angola, Luanda, M F]	Angola	Luanda	F	M	wt
AR0047-Ca	AR0047-C	AOcol	AR0047-Ca [Angola, Luanda, M F]	Angola	Luanda	F	M	wt
AR0047-Cb	AR0047-C	AOcol	AR0047-Cb [Angola, Luanda, M F]	Angola	Luanda	F	M	wt
AR0048-Ca	AR0048-C	AOcol	AR0048-Ca [Angola, Luanda, M F]	Angola	Luanda	F	M	C1
AR0048-Cb	AR0048-C	AOcol	AR0048-Cb [Angola, Luanda, M F]	Angola	Luanda	F	M	wt
AR0049-Ca	AR0049-C	AOcol	AR0049-Ca [Angola, Luanda, M F]	Angola	Luanda	F	M	wt
AR0049-Cb	AR0049-C	AOcol	AR0049-Cb [Angola, Luanda, M F]	Angola	Luanda	F	M	wt
AR0050-Ca	AR0050-C	AOcol	AR0050-Ca [Angola, Luanda, M F]	Angola	Luanda	F	M	wt
AR0050-Cb	AR0050-C	AOcol	AR0050-Cb [Angola, Luanda, M F]	Angola	Luanda	F	M	wt
AR0051-Ca	AR0051-C	AOcol	AR0051-Ca [Angola, Luanda, M F]	Angola	Luanda	F	M	wt
AR0051-Cb	AR0051-C	AOcol	AR0051-Cb [Angola, Luanda, M F]	Angola	Luanda	F	M	wt
AR0052-Ca	AR0052-C	AOcol	AR0052-Ca [Angola, Luanda, M F]	Angola	Luanda	F	M	wt
AR0052-Cb	AR0052-C	AOcol	AR0052-Cb [Angola, Luanda, M F]	Angola	Luanda	F	M	wt
AR0053-Ca	AR0053-C	AOcol	AR0053-Ca [Angola, Luanda, M F]	Angola	Luanda	F	M	C1
AR0053-Cb	AR0053-C	AOcol	AR0053-Cb [Angola, Luanda, M F]	Angola	Luanda	F	M	wt
AR0054-Ca	AR0054-C	AOcol	AR0054-Ca [Angola, Luanda, M F]	Angola	Luanda	F	M	wt
AR0054-Cb	AR0054-C	AOcol	AR0054-Cb [Angola, Luanda, M F]	Angola	Luanda	F	M	wt
AR0057-Ca	AR0057-C	AOcol	AR0057-Ca [Angola, Luanda, M F]	Angola	Luanda	F	M	wt
AR0057-Cb	AR0057-C	AOcol	AR0057-Cb [Angola, Luanda, M F]	Angola	Luanda	F	M	wt
AR0059-Ca	AR0059-C	AOcol	AR0059-Ca [Angola, Luanda, M F]	Angola	Luanda	F	M	wt
AR0059-Cb	AR0059-C	AOcol	AR0059-Cb [Angola, Luanda, M F]	Angola	Luanda	F	M	C1
AR0060-Ca	AR0060-C	AOcol	AR0060-Ca [Angola, Luanda, M F]	Angola	Luanda	F	M	C1
AR0060-Cb	AR0060-C	AOcol	AR0060-Cb [Angola, Luanda, M F]	Angola	Luanda	F	M	wt
AR0061-Ca	AR0061-C	AOcol	AR0061-Ca [Angola, Luanda, M F]	Angola	Luanda	F	M	wt
AR0061-Cb	AR0061-C	AOcol	AR0061-Cb [Angola, Luanda, M F]	Angola	Luanda	F	M	wt
AR0062-Ca	AR0062-C	AOcol	AR0062-Ca [Angola, Luanda, M F]	Angola	Luanda	F	M	C1
AR0062-Cb	AR0062-C	AOcol	AR0062-Cb [Angola, Luanda, M F]	Angola	Luanda	F	M	wt
AR0063-Ca	AR0063-C	AOcol	AR0063-Ca [Angola, Luanda, M F]	Angola	Luanda	F	M	wt
AR0063-Cb	AR0063-C	AOcol	AR0063-Cb [Angola, Luanda, M F]	Angola	Luanda	F	M	wt
AR0064-Ca	AR0064-C	AOcol	AR0064-Ca [Angola, Luanda, M F]	Angola	Luanda	F	M	C1
AR0064-Cb	AR0064-C	AOcol	AR0064-Cb [Angola, Luanda, M F]	Angola	Luanda	F	M	wt
AR0065-Ca	AR0065-C	AOcol	AR0065-Ca [Angola, Luanda, M F]	Angola	Luanda	F	M	wt
AR0065-Cb	AR0065-C	AOcol	AR0065-Cb [Angola, Luanda, M F]	Angola	Luanda	F	M	wt
AR0066-Ca	AR0066-C	AOcol	AR0066-Ca [Angola, Luanda, M F]	Angola	Luanda	F	M	C1
AR0066-Cb	AR0066-C	AOcol	AR0066-Cb [Angola, Luanda, M F]	Angola	Luanda	F	M	C1
AR0069-Ca	AR0069-C	AOcol	AR0069-Ca [Angola, Luanda, M F]	Angola	Luanda	F	M	C1
AR0069-Cb	AR0069-C	AOcol	AR0069-Cb [Angola, Luanda, M F]	Angola	Luanda	F	M	wt
AR0070-Ca	AR0070-C	AOcol	AR0070-Ca [Angola, Luanda, M F]	Angola	Luanda	F	M	wt
AR0070-Cb	AR0070-C	AOcol	AR0070-Cb [Angola, Luanda, M F]	Angola	Luanda	F	M	wt
AR0071-Ca	AR0071-C	AOcol	AR0071-Ca [Angola, Luanda, M F]	Angola	Luanda	F	M	C1
AR0071-Cb	AR0071-C	AOcol	AR0071-Cb [Angola, Luanda, M F]	Angola	Luanda	F	M	wt
AR0072-Ca	AR0072-C	AOcol	AR0072-Ca [Angola, Luanda, M F]	Angola	Luanda	F	M	C1
AR0072-Cb	AR0072-C	AOcol	AR0072-Cb [Angola, Luanda, M F]	Angola	Luanda	F	M	wt
AR0073-Ca	AR0073-C	AOcol	AR0073-Ca [Angola, Luanda, M F]	Angola	Luanda	F	M	C1
AR0073-Cb	AR0073-C	AOcol	AR0073-Cb [Angola, Luanda, M F]	Angola	Luanda	F	M	wt
AR0074-Ca	AR0074-C	AOcol	AR0074-Ca [Angola, Luanda, M F]	Angola	Luanda	F	M	wt
AR0074-Cb	AR0074-C	AOcol	AR0074-Cb [Angola, Luanda, M F]	Angola	Luanda	F	M	wt
AR0075-Ca	AR0075-C	AOcol	AR0075-Ca [Angola, Luanda, M F]	Angola	Luanda	F	M	wt
AR0075-Cb	AR0075-C	AOcol	AR0075-Cb [Angola, Luanda, M F]	Angola	Luanda	F	M	wt
AR0076-Ca	AR0076-C	AOcol	AR0076-Ca [Angola, Luanda, M F]	Angola	Luanda	F	M	wt
AR0076-Cb	AR0076-C	AOcol	AR0076-Cb [Angola, Luanda, M F]	Angola	Luanda	F	M	C1
AR0077-Ca	AR0077-C	AOcol	AR0077-Ca [Angola, Luanda, M F]	Angola	Luanda	F	M	C1
AR0077-Cb	AR0077-C	AOcol	AR0077-Cb [Angola, Luanda, M F]	Angola	Luanda	F	M	C1
AR0078-Ca	AR0078-C	AOcol	AR0078-Ca [Angola, Luanda, M F]	Angola	Luanda	F	M	wt
AR0078-Cb	AR0078-C	AOcol	AR0078-Cb [Angola, Luanda, M F]	Angola	Luanda	F	M	wt
AR0079-Ca	AR0079-C	AOcol	AR0079-Ca [Angola, Luanda, M F]	Angola	Luanda	F	M	wt
AR0079-Cb	AR0079-C	AOcol	AR0079-Cb [Angola, Luanda, M F]	Angola	Luanda	F	M	wt
AR0080-Ca	AR0080-C	AOcol	AR0080-Ca [Angola, Luanda, M F]	Angola	Luanda	F	M	wt
AR0080-Cb	AR0080-C	AOcol	AR0080-Cb [Angola, Luanda, M F]	Angola	Luanda	F	M	C1
AR0081-Ca	AR0081-C	AOcol	AR0081-Ca [Angola, Luanda, M F]	Angola	Luanda	F	M	wt
AR0081-Cb	AR0081-C	AOcol	AR0081-Cb [Angola, Luanda, M F]	Angola	Luanda	F	M	C1
AR0082-Ca	AR0082-C	AOcol	AR0082-Ca [Angola, Luanda, M F]	Angola	Luanda	F	M	C1
AR0082-Cb	AR0082-C	AOcol	AR0082-Cb [Angola, Luanda, M F]	Angola	Luanda	F	M	wt
AR0083-Ca	AR0083-C	AOcol	AR0083-Ca [Angola, Luanda, M F]	Angola	Luanda	F	M	wt
AR0083-Cb	AR0083-C	AOcol	AR0083-Cb [Angola, Luanda, M F]	Angola	Luanda	F	M	C1
AR0084-Ca	AR0084-C	AOcol	AR0084-Ca [Angola, Luanda, M F]	Angola	Luanda	F	M	wt
AR0084-Cb	AR0084-C	AOcol	AR0084-Cb [Angola, Luanda, M F]	Angola	Luanda	F	M	wt
AR0085-Ca	AR0085-C	AOcol	AR0085-Ca [Angola, Luanda, M F]	Angola	Luanda	F	M	wt
AR0085-Cb	AR0085-C	AOcol	AR0085-Cb [Angola, Luanda, M F]	Angola	Luanda	F	M	C1
AR0086-Ca	AR0086-C	AOcol	AR0086-Ca [Angola, Luanda, M F]	Angola	Luanda	F	M	wt
AR0086-Cb	AR0086-C	AOcol	AR0086-Cb [Angola, Luanda, M F]	Angola	Luanda	F	M	wt
AR0087-Ca	AR0087-C	AOcol	AR0087-Ca [Angola, Luanda, M F]	Angola	Luanda	F	M	C1
AR0087-Cb	AR0087-C	AOcol	AR0087-Cb [Angola, Luanda, M F]	Angola	Luanda	F	M	wt
AR0088-Ca	AR0088-C	AOcol	AR0088-Ca [Angola, Luanda, M F]	Angola	Luanda	F	M	wt
AR0088-Cb	AR0088-C	AOcol	AR0088-Cb [Angola, Luanda, M F]	Angola	Luanda	F	M	wt
AR0089-Ca	AR0089-C	AOcol	AR0089-Ca [Angola, Luanda, M F]	Angola	Luanda	F	M	C5
AR0089-Cb	AR0089-C	AOcol	AR0089-Cb [Angola, Luanda, M F]	Angola	Luanda	F	M	C1
AR0090-Ca	AR0090-C	AOcol	AR0090-Ca [Angola, Luanda, M F]	Angola	Luanda	F	M	C1
AR0090-Cb	AR0090-C	AOcol	AR0090-Cb [Angola, Luanda, M F]	Angola	Luanda	F	M	C1
AR0092-Ca	AR0092-C	AOcol	AR0092-Ca [Angola, Luanda, M F]	Angola	Luanda	F	M	C1
AR0092-Cb	AR0092-C	AOcol	AR0092-Cb [Angola, Luanda, M F]	Angola	Luanda	F	M	C1
AR0093-Ca	AR0093-C	AOcol	AR0093-Ca [Angola, Luanda, M F]	Angola	Luanda	F	M	C1
AR0093-Cb	AR0093-C	AOcol	AR0093-Cb [Angola, Luanda, M F]	Angola	Luanda	F	M	C1
AR0095-Ca	AR0095-C	AOcol	AR0095-Ca [Angola, Luanda, M F]	Angola	Luanda	F	M	C1
AR0095-Cb	AR0095-C	AOcol	AR0095-Cb [Angola, Luanda, M F]	Angola	Luanda	F	M	wt
AR0096-Ca	AR0096-C	AOcol	AR0096-Ca [Angola, Luanda, M F]	Angola	Luanda	F	M	wt
AR0096-Cb	AR0096-C	AOcol	AR0096-Cb [Angola, Luanda, M F]	Angola	Luanda	F	M	C1
AR0097-Ca	AR0097-C	AOcol	AR0097-Ca [Angola, Luanda, M F]	Angola	Luanda	F	M	wt
AR0097-Cb	AR0097-C	AOcol	AR0097-Cb [Angola, Luanda, M F]	Angola	Luanda	F	M	C1
AR0098-Ca	AR0098-C	AOcol	AR0098-Ca [Angola, Luanda, M F]	Angola	Luanda	F	M	C1
AR0098-Cb	AR0098-C	AOcol	AR0098-Cb [Angola, Luanda, M F]	Angola	Luanda	F	M	wt
AR0099-Ca	AR0099-C	AOcol	AR0099-Ca [Angola, Luanda, M F]	Angola	Luanda	F	M	C1
AR0099-Cb	AR0099-C	AOcol	AR0099-Cb [Angola, Luanda, M F]	Angola	Luanda	F	M	C1
AR0100-Ca	AR0100-C	AOcol	AR0100-Ca [Angola, Luanda, M F]	Angola	Luanda	F	M	wt
AR0100-Cb	AR0100-C	AOcol	AR0100-Cb [Angola, Luanda, M F]	Angola	Luanda	F	M	wt
AS0001-Ca	AS0001-C	GAgam	AS0001-Ca [Gabon, Libreville, S F]	Gabon	Libreville	F	S	wt
AS0001-Cb	AS0001-C	GAgam	AS0001-Cb [Gabon, Libreville, S F]	Gabon	Libreville	F	S	wt
AS0002-Ca	AS0002-C	GAgam	AS0002-Ca [Gabon, Libreville, S F]	Gabon	Libreville	F	S	C2
AS0002-Cb	AS0002-C	GAgam	AS0002-Cb [Gabon, Libreville, S F]	Gabon	Libreville	F	S	C2
AS0003-Ca	AS0003-C	GAgam	AS0003-Ca [Gabon, Libreville, S F]	Gabon	Libreville	F	S	C2
AS0003-Cb	AS0003-C	GAgam	AS0003-Cb [Gabon, Libreville, S F]	Gabon	Libreville	F	S	C2
AS0004-Ca	AS0004-C	GAgam	AS0004-Ca [Gabon, Libreville, S F]	Gabon	Libreville	F	S	wt
AS0004-Cb	AS0004-C	GAgam	AS0004-Cb [Gabon, Libreville, S F]	Gabon	Libreville	F	S	wt
AS0005-Ca	AS0005-C	GAgam	AS0005-Ca [Gabon, Libreville, S F]	Gabon	Libreville	F	S	C2
AS0005-Cb	AS0005-C	GAgam	AS0005-Cb [Gabon, Libreville, S F]	Gabon	Libreville	F	S	wt
AS0006-Ca	AS0006-C	GAgam	AS0006-Ca [Gabon, Libreville, S F]	Gabon	Libreville	F	S	wt
AS0006-Cb	AS0006-C	GAgam	AS0006-Cb [Gabon, Libreville, S F]	Gabon	Libreville	F	S	C2
AS0007-Ca	AS0007-C	GAgam	AS0007-Ca [Gabon, Libreville, S F]	Gabon	Libreville	F	S	C4
AS0007-Cb	AS0007-C	GAgam	AS0007-Cb [Gabon, Libreville, S F]	Gabon	Libreville	F	S	wt
AS0008-Ca	AS0008-C	GAgam	AS0008-Ca [Gabon, Libreville, S F]	Gabon	Libreville	F	S	C2
AS0008-Cb	AS0008-C	GAgam	AS0008-Cb [Gabon, Libreville, S F]	Gabon	Libreville	F	S	wt
AS0009-Ca	AS0009-C	GAgam	AS0009-Ca [Gabon, Libreville, S F]	Gabon	Libreville	F	S	C2
AS0009-Cb	AS0009-C	GAgam	AS0009-Cb [Gabon, Libreville, S F]	Gabon	Libreville	F	S	C2
AS0010-Ca	AS0010-C	GAgam	AS0010-Ca [Gabon, Libreville, S F]	Gabon	Libreville	F	S	wt
AS0010-Cb	AS0010-C	GAgam	AS0010-Cb [Gabon, Libreville, S F]	Gabon	Libreville	F	S	C2
AS0011-Ca	AS0011-C	GAgam	AS0011-Ca [Gabon, Libreville, S F]	Gabon	Libreville	F	S	C2
AS0011-Cb	AS0011-C	GAgam	AS0011-Cb [Gabon, Libreville, S F]	Gabon	Libreville	F	S	C2
AS0012-Ca	AS0012-C	GAgam	AS0012-Ca [Gabon, Libreville, S F]	Gabon	Libreville	F	S	wt
AS0012-Cb	AS0012-C	GAgam	AS0012-Cb [Gabon, Libreville, S F]	Gabon	Libreville	F	S	wt
AS0013-Ca	AS0013-C	GAgam	AS0013-Ca [Gabon, Libreville, S F]	Gabon	Libreville	F	S	wt
AS0013-Cb	AS0013-C	GAgam	AS0013-Cb [Gabon, Libreville, S F]	Gabon	Libreville	F	S	C4
AS0014-Ca	AS0014-C	GAgam	AS0014-Ca [Gabon, Libreville, S F]	Gabon	Libreville	F	S	wt
AS0014-Cb	AS0014-C	GAgam	AS0014-Cb [Gabon, Libreville, S F]	Gabon	Libreville	F	S	wt
AS0015-Ca	AS0015-C	GAgam	AS0015-Ca [Gabon, Libreville, S F]	Gabon	Libreville	F	S	C2
AS0015-Cb	AS0015-C	GAgam	AS0015-Cb [Gabon, Libreville, S F]	Gabon	Libreville	F	S	wt
AS0016-Ca	AS0016-C	GAgam	AS0016-Ca [Gabon, Libreville, S F]	Gabon	Libreville	F	S	C2
AS0016-Cb	AS0016-C	GAgam	AS0016-Cb [Gabon, Libreville, S F]	Gabon	Libreville	F	S	C4
AS0017-Ca	AS0017-C	GAgam	AS0017-Ca [Gabon, Libreville, S F]	Gabon	Libreville	F	S	wt
AS0017-Cb	AS0017-C	GAgam	AS0017-Cb [Gabon, Libreville, S F]	Gabon	Libreville	F	S	wt
AS0018-Ca	AS0018-C	GAgam	AS0018-Ca [Gabon, Libreville, S F]	Gabon	Libreville	F	S	C2
AS0018-Cb	AS0018-C	GAgam	AS0018-Cb [Gabon, Libreville, S F]	Gabon	Libreville	F	S	C2
AS0019-Ca	AS0019-C	GAgam	AS0019-Ca [Gabon, Libreville, S F]	Gabon	Libreville	F	S	C2
AS0019-Cb	AS0019-C	GAgam	AS0019-Cb [Gabon, Libreville, S F]	Gabon	Libreville	F	S	C2
AS0020-Ca	AS0020-C	GAgam	AS0020-Ca [Gabon, Libreville, S F]	Gabon	Libreville	F	S	C2
AS0020-Cb	AS0020-C	GAgam	AS0020-Cb [Gabon, Libreville, S F]	Gabon	Libreville	F	S	wt
AS0021-Ca	AS0021-C	GAgam	AS0021-Ca [Gabon, Libreville, S F]	Gabon	Libreville	F	S	C2
AS0021-Cb	AS0021-C	GAgam	AS0021-Cb [Gabon, Libreville, S F]	Gabon	Libreville	F	S	wt
AS0022-Ca	AS0022-C	GAgam	AS0022-Ca [Gabon, Libreville, S F]	Gabon	Libreville	F	S	C2
AS0022-Cb	AS0022-C	GAgam	AS0022-Cb [Gabon, Libreville, S F]	Gabon	Libreville	F	S	wt
AS0024-Ca	AS0024-C	GAgam	AS0024-Ca [Gabon, Libreville, S F]	Gabon	Libreville	F	S	wt
AS0024-Cb	AS0024-C	GAgam	AS0024-Cb [Gabon, Libreville, S F]	Gabon	Libreville	F	S	wt
AS0025-Ca	AS0025-C	GAgam	AS0025-Ca [Gabon, Libreville, S F]	Gabon	Libreville	F	S	wt
AS0025-Cb	AS0025-C	GAgam	AS0025-Cb [Gabon, Libreville, S F]	Gabon	Libreville	F	S	C2
AS0026-Ca	AS0026-C	GAgam	AS0026-Ca [Gabon, Libreville, S F]	Gabon	Libreville	F	S	wt
AS0026-Cb	AS0026-C	GAgam	AS0026-Cb [Gabon, Libreville, S F]	Gabon	Libreville	F	S	C2
AS0027-Ca	AS0027-C	GAgam	AS0027-Ca [Gabon, Libreville, S F]	Gabon	Libreville	F	S	C2
AS0027-Cb	AS0027-C	GAgam	AS0027-Cb [Gabon, Libreville, S F]	Gabon	Libreville	F	S	C2
AS0028-Ca	AS0028-C	GAgam	AS0028-Ca [Gabon, Libreville, S F]	Gabon	Libreville	F	S	C4
AS0028-Cb	AS0028-C	GAgam	AS0028-Cb [Gabon, Libreville, S F]	Gabon	Libreville	F	S	wt
AS0029-Ca	AS0029-C	GAgam	AS0029-Ca [Gabon, Libreville, S F]	Gabon	Libreville	F	S	wt
AS0029-Cb	AS0029-C	GAgam	AS0029-Cb [Gabon, Libreville, S F]	Gabon	Libreville	F	S	C2
AS0030-Ca	AS0030-C	GAgam	AS0030-Ca [Gabon, Libreville, S F]	Gabon	Libreville	F	S	C2
AS0030-Cb	AS0030-C	GAgam	AS0030-Cb [Gabon, Libreville, S F]	Gabon	Libreville	F	S	wt
AS0032-Ca	AS0032-C	GAgam	AS0032-Ca [Gabon, Libreville, S F]	Gabon	Libreville	F	S	wt
AS0032-Cb	AS0032-C	GAgam	AS0032-Cb [Gabon, Libreville, S F]	Gabon	Libreville	F	S	wt
AS0033-Ca	AS0033-C	GAgam	AS0033-Ca [Gabon, Libreville, S F]	Gabon	Libreville	F	S	C2
AS0033-Cb	AS0033-C	GAgam	AS0033-Cb [Gabon, Libreville, S F]	Gabon	Libreville	F	S	C4
AS0034-Ca	AS0034-C	GAgam	AS0034-Ca [Gabon, Libreville, S F]	Gabon	Libreville	F	S	C2
AS0034-Cb	AS0034-C	GAgam	AS0034-Cb [Gabon, Libreville, S F]	Gabon	Libreville	F	S	C2
AS0035-Ca	AS0035-C	GAgam	AS0035-Ca [Gabon, Libreville, S F]	Gabon	Libreville	F	S	wt
AS0035-Cb	AS0035-C	GAgam	AS0035-Cb [Gabon, Libreville, S F]	Gabon	Libreville	F	S	C2
AS0036-Ca	AS0036-C	GAgam	AS0036-Ca [Gabon, Libreville, S F]	Gabon	Libreville	F	S	C2
AS0036-Cb	AS0036-C	GAgam	AS0036-Cb [Gabon, Libreville, S F]	Gabon	Libreville	F	S	wt
AS0037-Ca	AS0037-C	GAgam	AS0037-Ca [Gabon, Libreville, S F]	Gabon	Libreville	F	S	wt
AS0037-Cb	AS0037-C	GAgam	AS0037-Cb [Gabon, Libreville, S F]	Gabon	Libreville	F	S	C2
AS0039-Ca	AS0039-C	GAgam	AS0039-Ca [Gabon, Libreville, S F]	Gabon	Libreville	F	S	C2
AS0039-Cb	AS0039-C	GAgam	AS0039-Cb [Gabon, Libreville, S F]	Gabon	Libreville	F	S	wt
AS0040-Ca	AS0040-C	GAgam	AS0040-Ca [Gabon, Libreville, S F]	Gabon	Libreville	F	S	wt
AS0040-Cb	AS0040-C	GAgam	AS0040-Cb [Gabon, Libreville, S F]	Gabon	Libreville	F	S	wt
AS0041-Ca	AS0041-C	GAgam	AS0041-Ca [Gabon, Libreville, S F]	Gabon	Libreville	F	S	wt
AS0041-Cb	AS0041-C	GAgam	AS0041-Cb [Gabon, Libreville, S F]	Gabon	Libreville	F	S	C4
AS0042-Ca	AS0042-C	GAgam	AS0042-Ca [Gabon, Libreville, S F]	Gabon	Libreville	F	S	C4
AS0042-Cb	AS0042-C	GAgam	AS0042-Cb [Gabon, Libreville, S F]	Gabon	Libreville	F	S	wt
AS0044-Ca	AS0044-C	GAgam	AS0044-Ca [Gabon, Libreville, S F]	Gabon	Libreville	F	S	C2
AS0044-Cb	AS0044-C	GAgam	AS0044-Cb [Gabon, Libreville, S F]	Gabon	Libreville	F	S	C4
AS0045-Ca	AS0045-C	GAgam	AS0045-Ca [Gabon, Libreville, S F]	Gabon	Libreville	F	S	wt
AS0045-Cb	AS0045-C	GAgam	AS0045-Cb [Gabon, Libreville, S F]	Gabon	Libreville	F	S	wt
AS0046-Ca	AS0046-C	GAgam	AS0046-Ca [Gabon, Libreville, S F]	Gabon	Libreville	F	S	C2
[truncated: 285 more rows]
